# Supplementary material
Source: PubMed Central journal article supplement (PMC2925680)
Supplement: NIHMS214807-supplement-1_si_001.pdf [file NIHMS214807-supplement-1_si_001.pdf]

## Supporting Information

# A Library of 1,4-Disubstituted 1,2,3-Triazole Analogs of the Oxazolidinone RNA-Binding Agents.

*George Acquah-Harrison, Shu Zhou, Jennifer V. Hines and Stephen C. Bergmeier\**

*Department of Chemistry and Biochemistry, Ohio University, Athens, OH 45701, USA.*

Author to whom correspondence should be addressed:

Phone Number: 740-597-9649

Fax Number: 740-593-0148

Email: bergmeis@ohio.edu

### Table of Contents

|                                                                                                                       |           |
|-----------------------------------------------------------------------------------------------------------------------|-----------|
| <b>Biological data of 1,4-disubstituted 1,2,3-triazole members</b> .....                                              | <b>8</b>  |
| <b>Table 1.</b> FRET screening of 1,4-disubstituted 1,2,3-triazole binding affinity for model RNAs AM1A and C11U..... | <b>8</b>  |
| <b>Procedures for Precursors and selected Library Members</b> .....                                                   | <b>9</b>  |
| <b>General Procedures.</b> .....                                                                                      | <b>9</b>  |
| <b>General method A for glycidyl ester 6a-c synthesis.</b> .....                                                      | <b>9</b>  |
| <b>General method B for glycidyl carbamate 8a-b synthesis</b> .....                                                   | <b>10</b> |
| <b>General method A for the synthesis of propargylamine derivatives 4{1-7}.</b> .....                                 | <b>16</b> |
| <b>General method B for the synthesis of propargylamine derivatives 4{8-9}.</b> .....                                 | <b>17</b> |

|                                                                               |           |
|-------------------------------------------------------------------------------|-----------|
| General procedure for 1,4-disubstituted 1,2,3-triazole synthesis.....         | 20        |
| <b>Glycidyl esters 6a-c.....</b>                                              | <b>30</b> |
| Oxiran-2-ylmethyl octanoate (6a). <sup>1</sup> H NMR.....                     | 30        |
| Oxiran-2-ylmethyl benzoate (6b). <sup>1</sup> H NMR.....                      | 30        |
| Oxiran-2-ylmethyl benzoate (6b). <sup>13</sup> C NMR.....                     | 31        |
| Oxiran-2-ylmethyl cyclohexanecarboxylate (6c). <sup>1</sup> H NMR.....        | 31        |
| Oxiran-2-ylmethyl cyclohexanecarboxylate (6c). <sup>13</sup> C NMR.....       | 32        |
| <b>Glycidyl carbamates 8a-b.....</b>                                          | <b>32</b> |
| Oxiran-2-ylmethyl benzylcarbamate (8a). <sup>1</sup> H NMR.....               | 32        |
| Oxiran-2-ylmethyl benzylcarbamate (8a). <sup>13</sup> C NMR.....              | 33        |
| Oxiran-2-ylmethyl butylcarbamate (8b). <sup>1</sup> H NMR.....                | 33        |
| Oxiran-2-ylmethyl butylcarbamate (8b). <sup>13</sup> C NMR.....               | 34        |
| <b>Azide components 3{1-12}.....</b>                                          | <b>34</b> |
| 3-azido-2-hydroxypropyl octanoate 3{1}. <sup>1</sup> H NMR.....               | 34        |
| 3-azido-2-hydroxypropyl octanoate 3{1}. <sup>13</sup> C NMR.....              | 35        |
| 3-azido-2-hydroxypropyl benzoate 3{2}. <sup>1</sup> H NMR.....                | 35        |
| 3-azido-2-hydroxypropyl benzoate 3{2}. <sup>13</sup> C NMR.....               | 36        |
| 3-azido-2-hydroxypropyl cyclohexanecarboxylate 3{3}. <sup>1</sup> H NMR.....  | 36        |
| 3-azido-2-hydroxypropyl cyclohexanecarboxylate 3{3}. <sup>13</sup> C NMR..... | 37        |
| 3-azido-2-hydroxypropyl benzylcarbamate 3{4}. <sup>1</sup> H NMR.....         | 37        |
| 3-azido-2-hydroxypropyl benzylcarbamate 3{4}. <sup>13</sup> C NMR.....        | 38        |
| 3-azido-2-hydroxypropyl butylcarbamate 3{5}. <sup>1</sup> H NMR.....          | 38        |
| 3-azido-2-hydroxypropyl butylcarbamate 3{5}. <sup>13</sup> C NMR.....         | 39        |
| 2-azido-1-phenylethanol 3{6}. <sup>1</sup> H NMR.....                         | 39        |
| 2-azido-1-phenylethanol 3{6}. <sup>13</sup> C NMR.....                        | 40        |
| 2-azidohexan-2-ol 3{7}. <sup>1</sup> H NMR.....                               | 40        |
| 2-azidohexan-2-ol 3{7}. <sup>13</sup> C NMR.....                              | 41        |
| 1-azido-3-(benzyloxy)propan-2-ol 3{8}. <sup>1</sup> H NMR.....                | 41        |
| 1-azido-3-(benzyloxy)propan-2-ol 3{8}. <sup>13</sup> C NMR.....               | 42        |
| Trans-2-azidocyclohexanol 3{9}. <sup>1</sup> H NMR.....                       | 42        |
| Trans-2-azidocyclohexanol 3{9}. <sup>13</sup> C NMR.....                      | 43        |
| Trans-2-azidocyclohexyl benzoate 3{10}. <sup>1</sup> H NMR.....               | 43        |
| Trans-2-azidocyclohexyl benzoate 3{10}. <sup>13</sup> C NMR.....              | 44        |
| Trans-2-azidocyclohexyl 2-phenylacetate 3{11}. <sup>1</sup> H NMR.....        | 44        |
| Trans-2-azidocyclohexyl 2-phenylacetate 3{11}. <sup>13</sup> C NMR.....       | 45        |
| Trans-2-azidocyclohexyl 2-phenoxyacetate 3{12}. <sup>1</sup> H NMR.....       | 45        |
| Trans-2-azidocyclohexyl 2-phenoxyacetate 3{12}. <sup>13</sup> C NMR.....      | 46        |
| <b>Alkyne components 4{1-9}.....</b>                                          | <b>46</b> |
| N-butyl-N-(prop-2-ynyl)butan-1-amine 4{1}. <sup>1</sup> H NMR.....            | 46        |
| N-butyl-N-(prop-2-ynyl)butan-1-amine 4{1}. <sup>13</sup> C NMR.....           | 47        |
| N-methyl-N-(3-phenylpropyl)prop-2-yn-1-amine 4{2}. <sup>1</sup> H NMR.....    | 47        |
| N-methyl-N-(3-phenylpropyl)prop-2-yn-1-amine 4{2}. <sup>13</sup> C NMR.....   | 48        |
| N-methyl-N-phenethylprop-2-yn-1-amine 4{3}. <sup>1</sup> H NMR.....           | 48        |

|                                                                                                                                                |           |
|------------------------------------------------------------------------------------------------------------------------------------------------|-----------|
| N-methyl-N-phenethylprop-2-yn-1-amine 4{3}. <sup>13</sup> C NMR .....                                                                          | 49        |
| 4-(prop-2-ynyl)morpholine 4{4}. <sup>1</sup> H NMR .....                                                                                       | 49        |
| 4-(prop-2-ynyl)morpholine 4{4}. <sup>13</sup> C NMR .....                                                                                      | 50        |
| 4-phenyl-1-(prop-2-ynyl)piperidine 4{5}. <sup>1</sup> H NMR .....                                                                              | 50        |
| 4-phenyl-1-(prop-2-ynyl)piperidine 4{5}. <sup>13</sup> C NMR .....                                                                             | 51        |
| 1-phenyl-4-(prop-2-ynyl)piperazine 4{6}. <sup>1</sup> H NMR.....                                                                               | 51        |
| 1-phenyl-4-(prop-2-ynyl)piperazine 4{6}. <sup>13</sup> C NMR.....                                                                              | 52        |
| .....                                                                                                                                          | 52        |
| Ethyl 1-(prop-2-ynyl)piperidine-3-carboxylate 4{7}. <sup>1</sup> H NMR.....                                                                    | 52        |
| Ethyl 1-(prop-2-ynyl)piperidine-3-carboxylate 4{7}. <sup>13</sup> C NMR.....                                                                   | 53        |
| N-(cyclohexylmethyl)-N-methylprop-2-yn-1-amine 4{8}. <sup>1</sup> H NMR.....                                                                   | 53        |
| N-(cyclohexylmethyl)-N-methylprop-2-yn-1-amine 4{8}. <sup>13</sup> C NMR.....                                                                  | 54        |
| N,3-dimethyl-N-(prop-2-ynyl)butan-1-amine 4{9}. <sup>1</sup> H NMR .....                                                                       | 54        |
| N,3-dimethyl-N-(prop-2-ynyl)butan-1-amine 4{9}. <sup>13</sup> C NMR .....                                                                      | 55        |
| <b>1,4-disubstituted 1,2,3-triazole library .....</b>                                                                                          | <b>55</b> |
| 2-hydroxy-3-(4-((methyl(3-phenylpropyl)amino)methyl)-1H-1,2,3-triazol-1-yl)propyl<br>benzylcarbamate 2{4,2}. <sup>1</sup> H NMR.....           | 55        |
| 2-(4-((4-phenylpiperazin-1-yl)methyl)-1H-1,2,3-triazol-1-yl)cyclohexanol 2{9,6}. <sup>1</sup> H NMR.....                                       | 56        |
| Ethyl 1-((1-(2-hydroxyhexyl)-1H-1,2,3-triazol-4-yl)methyl)piperidine-3-carboxylate 2{7,7}. <sup>1</sup> H<br>NMR.....                          | 56        |
| 1-(4-(((cyclohexylmethyl)(methyl)amino)methyl)-1H-1,2,3-triazol-1-yl)hexan-2-ol 2{7,8}. <sup>1</sup> H NMR<br>.....                            | 57        |
| 1-(4-((4-phenylpiperazin-1-yl)methyl)-1H-1,2,3-triazol-1-yl)hexan-2-ol 2{7,6}. <sup>1</sup> H NMR .....                                        | 57        |
| Ethyl 1-((1-(2-hydroxycyclohexyl)-1H-1,2,3-triazol-4-yl)methyl)piperidine-3-carboxylate 2{9,7}.<br><sup>1</sup> H NMR.....                     | 58        |
| 2-(4-(((cyclohexylmethyl)(methyl)amino)methyl)-1H-1,2,3-triazol-1-yl)cyclohexanol 2{9,8}. <sup>1</sup> H<br>NMR.....                           | 58        |
| Ethyl 1-((1-(3-(benzyloxy)-2-hydroxypropyl)-1H-1,2,3-triazol-4-yl)methyl)piperidine-3-<br>carboxylate 2{8,7}. <sup>1</sup> H NMR.....          | 59        |
| .....                                                                                                                                          | 59        |
| 3-(4-(((dibutylamino)methyl)-1H-1,2,3-triazol-1-yl)-2-hydroxypropyl benzylcarbamate 2{4,1}. <sup>1</sup> H<br>NMR.....                         | 59        |
| Ethyl 1-((1-(3-(benzylcarbamoyloxy)-2-hydroxypropyl)-1H-1,2,3-triazol-4-yl)methyl)piperidine-<br>3-carboxylate 2{4,7}. <sup>1</sup> H NMR..... | 60        |
| 2-hydroxy-3-(4-((isopentyl(methyl)amino)methyl)-1H-1,2,3-triazol-1-yl)propyl benzylcarbamate<br>2{4,9}. <sup>1</sup> H NMR.....                | 60        |
| 3-(4-(((cyclohexylmethyl)(methyl) amino)methyl)-1H-1,2,3-triazol-1-yl)-2-hydroxypropyl<br>benzylcarbamate 2{4,8}. <sup>1</sup> H NMR.....      | 61        |
| 2-(4-((4-phenylpiperidin-1-yl)methyl)-1H-1,2,3-triazol-1-yl)cyclohexyl benzoate 2{10,5}. <sup>1</sup> H NMR<br>.....                           | 61        |
| 2-(4-(((cyclohexylmethyl)(methyl)amino)methyl)-1H-1,2,3-triazol-1-yl)cyclohexyl 2-<br>phenoxyacetate 2{12,8}. <sup>1</sup> H NMR.....          | 62        |
| 2-(4-((methyl(3-phenylpropyl)amino)methyl)-1H-1,2,3-triazol-1-yl)cyclohexyl 2-phenoxyacetate<br>2{12,2}. <sup>1</sup> H NMR .....              | 62        |
| 2-(4-((4-phenylpiperidin-1-yl)methyl)-1H-1,2,3-triazol-1-yl)cyclohexyl 2-phenoxyacetate 2{12,5}.<br><sup>1</sup> H NMR.....                    | 63        |
| 2-(4-(((dibutylamino)methyl)-1H-1,2,3-triazol-1-yl)cyclohexyl 2-phenoxyacetate 2{12,1}. <sup>1</sup> H NMR<br>.....                            | 63        |

|                                                                                                                                                                                    |           |
|------------------------------------------------------------------------------------------------------------------------------------------------------------------------------------|-----------|
| Ethyl 1-((1-(2-(2-phenoxyacetoxy)cyclohexyl)-1H-1,2,3-triazol-4-yl)methyl)piperidine-3-carboxylate 2{12,7}. <sup>1</sup> H NMR .....                                               | 64        |
| 2-(4-(((dibutylamino)methyl)-1H-1,2,3-triazol-1-yl)cyclohexyl 2-phenylacetate 2{11,1}. <sup>1</sup> H NMR                                                                          | 64        |
| 2-(4-(((cyclohexylmethyl)(methyl)amino)methyl)-1H-1,2,3-triazol-1-yl)cyclohexyl 2-phenylacetate 2{11,8}. <sup>1</sup> H NMR .....                                                  | 65        |
| 2-hydroxy-3-(4-((4-phenylpiperidin-1-yl)methyl)-1H-1,2,3-triazol-1-yl)propyl benzylcarbamate 2{4,5}. <sup>1</sup> H NMR.....                                                       | 65        |
| <b>HPLC chromatograms for 1,4-disubstituted 1,2,3-triazole library members.....</b>                                                                                                | <b>66</b> |
| 1,4-disubstituted 1,2,3-triazole member 2{1,1}. HPLC (CH <sub>3</sub> OH : H <sub>2</sub> O) R <sub>T</sub> 17.05 (93%).....                                                       | 66        |
| .....                                                                                                                                                                              | 66        |
| 1,4-disubstituted 1,2,3-triazole member 2{1,2}. HPLC (CH <sub>3</sub> OH : H <sub>2</sub> O) R <sub>T</sub> 4.97 (81%), gradient elution 55% to 95% over 9 min.....                | 66        |
| 1,4-disubstituted 1,2,3-triazole member 2{1,3}. HPLC (CH <sub>3</sub> OH : H <sub>2</sub> O) R <sub>T</sub> 19.11 (91%), gradient elution 55% to 95% over 26 min.....              | 67        |
| .....                                                                                                                                                                              | 67        |
| 1,4-disubstituted 1,2,3-triazole member 2{1,4}. HPLC (CH <sub>3</sub> OH : H <sub>2</sub> O) R <sub>T</sub> 15.34 (87%), gradient elution 55% to 95% over 21 min.....              | 67        |
| 1,4-disubstituted 1,2,3-triazole member 2{1,5}. HPLC (CH <sub>3</sub> OH : H <sub>2</sub> O) R <sub>T</sub> 19.20 (100%). .....                                                    | 68        |
| 1,4-disubstituted 1,2,3-triazole member 2{1,6}. HPLC (CH <sub>3</sub> OH : H <sub>2</sub> O) R <sub>T</sub> 16.94 (98%).....                                                       | 68        |
| 1,4-disubstituted 1,2,3-triazole member 2{1,7}. HPLC (CH <sub>3</sub> OH : H <sub>2</sub> O) R <sub>T</sub> 16.84 (97%), gradient elution 55% to 95% over 21 min.....              | 69        |
| 1,4-disubstituted 1,2,3-triazole member 2{1,8}. HPLC (CH <sub>3</sub> OH : H <sub>2</sub> O) R <sub>T</sub> 19.92 (95%).....                                                       | 69        |
| 1,4-disubstituted 1,2,3-triazole member 2{1,9}. HPLC (CH <sub>3</sub> OH : H <sub>2</sub> O) R <sub>T</sub> 17.57 (84%).....                                                       | 70        |
| 1,4-disubstituted 1,2,3-triazole member 2{2,1}. HPLC (1% AcOH in CH <sub>3</sub> OH : H <sub>2</sub> O) R <sub>T</sub> 13.95 (100%), gradient elution 55% to 95% over 21 min. .... | 70        |
| 1,4-disubstituted 1,2,3-triazole member 2{2,2}. HPLC (CH <sub>3</sub> OH : H <sub>2</sub> O) R <sub>T</sub> 13.31 (83%), gradient elution 55% to 95% over 21 min.....              | 71        |
| 1,4-disubstituted 1,2,3-triazole member 2{2,3}. HPLC (1% AcOH in CH <sub>3</sub> OH : H <sub>2</sub> O) R <sub>T</sub> 2.40 (93%), gradient elution 30% to 90% over 26 min. ....   | 71        |
| 1,4-disubstituted 1,2,3-triazole member 2{2,4}. HPLC (CH <sub>3</sub> OH : H <sub>2</sub> O) R <sub>T</sub> 10.20 (81%), gradient elution 55% to 95% over 21 min.....              | 72        |
| 1,4-disubstituted 1,2,3-triazole member 2{2,5}. HPLC (CH <sub>3</sub> OH : H <sub>2</sub> O) R <sub>T</sub> 10.02 (84%), gradient elution 55% to 95% over 21 min.....              | 72        |
| 1,4-disubstituted 1,2,3-triazole member 2{2,6}. HPLC (CH <sub>3</sub> OH : H <sub>2</sub> O) R <sub>T</sub> 10.37 (81%), gradient elution 55% to 95% over 21 min.....              | 73        |
| 1,4-disubstituted 1,2,3-triazole member 2{2,7}. HPLC (CH <sub>3</sub> OH : H <sub>2</sub> O) R <sub>T</sub> 11.84 (84%), gradient elution 55% to 95% over 21 min.....              | 73        |
| 1,4-disubstituted 1,2,3-triazole member 2{2,8}. HPLC (1% AcOH in CH <sub>3</sub> OH : H <sub>2</sub> O) R <sub>T</sub> 2.53 (82%), gradient elution 30% to 90% over 21 min. ....   | 74        |
| 1,4-disubstituted 1,2,3-triazole member 2{2,9}. HPLC (CH <sub>3</sub> OH : H <sub>2</sub> O) R <sub>T</sub> 9.69 (84%), gradient elution 55% to 95% over 21 min.....               | 74        |
| 1,4-disubstituted 1,2,3-triazole member 2{3,1}. HPLC (CH <sub>3</sub> OH : H <sub>2</sub> O) R <sub>T</sub> 14.13 (83%), gradient elution 55% to 95% over 21 min.....              | 75        |
| 1,4-disubstituted 1,2,3-triazole member 2{3,2}. HPLC (1% AcOH in CH <sub>3</sub> OH : H <sub>2</sub> O) R <sub>T</sub> 4.30 (100%), gradient elution 30% to 90% over 26 min. ....  | 75        |
| 1,4-disubstituted 1,2,3-triazole member 2{3,3}. HPLC (1% AcOH in CH <sub>3</sub> OH : H <sub>2</sub> O) R <sub>T</sub> 2.45 (100%), gradient elution 30% to 90% over 26 min. ....  | 76        |
| 1,4-disubstituted 1,2,3-triazole member 2{3,4}. HPLC (1% AcOH in CH <sub>3</sub> OH : H <sub>2</sub> O) R <sub>T</sub> 5.09 (86%), gradient elution 30% to 90% over 20 min. ....   | 76        |

|                                                                                                                                                                                           |           |
|-------------------------------------------------------------------------------------------------------------------------------------------------------------------------------------------|-----------|
| <b>1,4-disubstituted 1,2,3-triazole member 2{3,5}</b> . HPLC (CH <sub>3</sub> OH : H <sub>2</sub> O) R <sub>T</sub> 18.19 (90%).....                                                      | <b>77</b> |
| <b>1,4-disubstituted 1,2,3-triazole member 2{3,6}</b> . HPLC (CH <sub>3</sub> OH : H <sub>2</sub> O) R <sub>T</sub> 12.07 (82%), gradient elution 55% to 95% over 21 min.....             | <b>77</b> |
| <b>1,4-disubstituted 1,2,3-triazole member 2{3,7}</b> . HPLC (CH <sub>3</sub> OH : H <sub>2</sub> O) R <sub>T</sub> 6.59 (96%), gradient elution 55% to 95% over 9 min.....               | <b>78</b> |
| <b>1,4-disubstituted 1,2,3-triazole member 2{3,8}</b> . HPLC (1% AcOH in CH <sub>3</sub> OH : H <sub>2</sub> O) R <sub>T</sub> 9.95 (84%), gradient elution 55% to 95% over 21 min. ....  | <b>78</b> |
| <b>1,4-disubstituted 1,2,3-triazole member 2{3,9}</b> . HPLC (CH <sub>3</sub> OH : H <sub>2</sub> O) R <sub>T</sub> 15.64 (85%).....                                                      | <b>79</b> |
| <b>1,4-disubstituted 1,2,3-triazole member 2{4,1}</b> . HPLC (1% AcOH in CH <sub>3</sub> OH : H <sub>2</sub> O) R <sub>T</sub> 2.50 (100%), gradient elution 30% to 90% over 26 min. .... | <b>79</b> |
| <b>1,4-disubstituted 1,2,3-triazole member 2{4,2}</b> . HPLC (1% AcOH in CH <sub>3</sub> OH : H <sub>2</sub> O) R <sub>T</sub> 2.92 (98%), gradient elution 30% to 90% over 13 min. ....  | <b>80</b> |
| <b>1,4-disubstituted 1,2,3-triazole member 2{4,3}</b> . HPLC (CH <sub>3</sub> OH : H <sub>2</sub> O) R <sub>T</sub> 15.42 (95%).....                                                      | <b>80</b> |
| <b>1,4-disubstituted 1,2,3-triazole member 2{4,4}</b> . HPLC (CH <sub>3</sub> OH : H <sub>2</sub> O) R <sub>T</sub> 14.47 (84%), gradient elution 55% to 95% over 21 min.....             | <b>81</b> |
| <b>1,4-disubstituted 1,2,3-triazole member 2{4,5}</b> . HPLC (1% AcOH in CH <sub>3</sub> OH : H <sub>2</sub> O) R <sub>T</sub> 2.32 (100%), gradient elution 30% to 90% over 20 min. .... | <b>81</b> |
| <b>1,4-disubstituted 1,2,3-triazole member 2{4,6}</b> . HPLC (CH <sub>3</sub> OH : H <sub>2</sub> O) R <sub>T</sub> 10.20 (80%), gradient elution 55% to 95% over 21 min.....             | <b>82</b> |
| <b>1,4-disubstituted 1,2,3-triazole member 2{4,7}</b> . HPLC (CH <sub>3</sub> OH : H <sub>2</sub> O) R <sub>T</sub> 13.88 (97%), gradient elution 55% to 95% over 21 min.....             | <b>82</b> |
| <b>1,4-disubstituted 1,2,3-triazole member 2{4,8}</b> . HPLC (CH <sub>3</sub> OH : H <sub>2</sub> O) R <sub>T</sub> 11.89 (84%), gradient elution 55% to 95% over 21 min.....             | <b>83</b> |
| <b>1,4-disubstituted 1,2,3-triazole member 2{4,9}</b> . HPLC (1% AcOH in CH <sub>3</sub> OH : H <sub>2</sub> O) R <sub>T</sub> 9.05 (81%), gradient elution 55% to 95% over 20 min. ....  | <b>83</b> |
| <b>1,4-disubstituted 1,2,3-triazole member 2{5,1}</b> . HPLC (1% AcOH in CH <sub>3</sub> OH : H <sub>2</sub> O) R <sub>T</sub> 8.64 (96%), gradient elution 30% to 90% over 26 min. ....  | <b>84</b> |
| <b>1,4-disubstituted 1,2,3-triazole member 2{5,2}</b> . HPLC (1% AcOH in CH <sub>3</sub> OH : H <sub>2</sub> O) R <sub>T</sub> 9.90 (99%), gradient elution 30% to 90% over 26 min. ....  | <b>84</b> |
| <b>1,4-disubstituted 1,2,3-triazole member 2{5,3}</b> . HPLC (1% AcOH in CH <sub>3</sub> OH : H <sub>2</sub> O) R <sub>T</sub> 4.05 (94%), gradient elution 30% to 90% over 26 min. ....  | <b>85</b> |
| <b>1,4-disubstituted 1,2,3-triazole member 2{5,4}</b> . HPLC (1% AcOH in CH <sub>3</sub> OH : H <sub>2</sub> O) R <sub>T</sub> 2.39 (100%), gradient elution 30% to 90% over 26 min. .... | <b>85</b> |
| <b>1,4-disubstituted 1,2,3-triazole member 2{5,5}</b> . HPLC (1% AcOH in CH <sub>3</sub> OH : H <sub>2</sub> O) R <sub>T</sub> 2.49 (100%), gradient elution 30% to 90% over 26 min. .... | <b>86</b> |
| <b>1,4-disubstituted 1,2,3-triazole member 2{5,6}</b> . HPLC (CH <sub>3</sub> OH : H <sub>2</sub> O) R <sub>T</sub> 10.70 (80%), gradient elution 55% to 95% over 21 min.....             | <b>86</b> |
| <b>1,4-disubstituted 1,2,3-triazole member 2{5,7}</b> . HPLC (CH <sub>3</sub> OH : H <sub>2</sub> O) R <sub>T</sub> 13.57 (92%), gradient elution 55% to 95% over 21 min.....             | <b>87</b> |
| <b>1,4-disubstituted 1,2,3-triazole member 2{5,8}</b> . HPLC (CH <sub>3</sub> OH : H <sub>2</sub> O) R <sub>T</sub> 13.06 (85%).....                                                      | <b>87</b> |
| <b>1,4-disubstituted 1,2,3-triazole member 2{5,9}</b> . HPLC (CH <sub>3</sub> OH : H <sub>2</sub> O) R <sub>T</sub> 10.60 (84%).....                                                      | <b>88</b> |
| <b>1,4-disubstituted 1,2,3-triazole member 2{6,1}</b> . HPLC (CH <sub>3</sub> OH : H <sub>2</sub> O) R <sub>T</sub> 17.45 (94%).....                                                      | <b>88</b> |
| <b>1,4-disubstituted 1,2,3-triazole member 2{6,2}</b> . HPLC (1% AcOH in CH <sub>3</sub> OH : H <sub>2</sub> O) R <sub>T</sub> 2.50 (84%), gradient elution 30% to 90% over 21 min. ....  | <b>89</b> |
| <b>1,4-disubstituted 1,2,3-triazole member 2{6,3}</b> . HPLC (CH <sub>3</sub> OH : H <sub>2</sub> O) R <sub>T</sub> 15.19 (84%).....                                                      | <b>89</b> |
| <b>1,4-disubstituted 1,2,3-triazole member 2{6,4}</b> . HPLC (CH <sub>3</sub> OH : H <sub>2</sub> O) R <sub>T</sub> 9.54 (100%).....                                                      | <b>90</b> |
| <b>1,4-disubstituted 1,2,3-triazole member 2{6,5}</b> . HPLC (1% AcOH in CH <sub>3</sub> OH : H <sub>2</sub> O) R <sub>T</sub> 2.52 (89%), gradient elution 30% to 90% over 21 min. ....  | <b>90</b> |

|                                                                                                                                                                                           |            |
|-------------------------------------------------------------------------------------------------------------------------------------------------------------------------------------------|------------|
| <b>1,4-disubstituted 1,2,3-triazole member 2{6,6}</b> . HPLC (CH <sub>3</sub> OH : H <sub>2</sub> O) R <sub>T</sub> 9.76 (80%), gradient elution 55% to 95% over 21 min.....              | <b>91</b>  |
| <b>1,4-disubstituted 1,2,3-triazole member 2{6,7}</b> . HPLC (1% AcOH in CH <sub>3</sub> OH : H <sub>2</sub> O) R <sub>T</sub> 3.12 (98%), gradient elution 30% to 90% over 26 min. ....  | <b>91</b>  |
| <b>1,4-disubstituted 1,2,3-triazole member 2{6,8}</b> . HPLC (CH <sub>3</sub> OH : H <sub>2</sub> O) R <sub>T</sub> 17.21 (94%).....                                                      | <b>92</b>  |
| <b>1,4-disubstituted 1,2,3-triazole member 2{6,9}</b> . HPLC (CH <sub>3</sub> OH : H <sub>2</sub> O) R <sub>T</sub> 15.34 (95%).....                                                      | <b>92</b>  |
| <b>1,4-disubstituted 1,2,3-triazole member 2{7,1}</b> . HPLC (CH <sub>3</sub> OH : H <sub>2</sub> O) R <sub>T</sub> 15.91 (100%).....                                                     | <b>93</b>  |
| <b>1,4-disubstituted 1,2,3-triazole member 2{7,2}</b> . HPLC (CH <sub>3</sub> OH : H <sub>2</sub> O) R <sub>T</sub> 15.72 (86%).....                                                      | <b>93</b>  |
| <b>1,4-disubstituted 1,2,3-triazole member 2{7,3}</b> . HPLC (1% AcOH in CH <sub>3</sub> OH : H <sub>2</sub> O) R <sub>T</sub> 13.95 (99%), gradient elution 30% to 90% over 21 min.....  | <b>94</b>  |
| <b>1,4-disubstituted 1,2,3-triazole member 2{7,4}</b> . HPLC (1% AcOH in CH <sub>3</sub> OH : H <sub>2</sub> O) R <sub>T</sub> 9.05 (90%), gradient elution 30% to 90% over 14 min. ....  | <b>94</b>  |
| <b>1,4-disubstituted 1,2,3-triazole member 2{7,5}</b> . HPLC (1% AcOH in CH <sub>3</sub> OH : H <sub>2</sub> O) R <sub>T</sub> 2.54 (90%), gradient elution 30% to 90% over 21 min. ....  | <b>95</b>  |
| <b>1,4-disubstituted 1,2,3-triazole member 2{7,6}</b> . HPLC (CH <sub>3</sub> OH : H <sub>2</sub> O) R <sub>T</sub> 9.79 (84%), gradient elution 55% to 95% over 21 min.....              | <b>95</b>  |
| <b>1,4-disubstituted 1,2,3-triazole member 2{7,7}</b> . HPLC (CH <sub>3</sub> OH : H <sub>2</sub> O) R <sub>T</sub> 14.25 (99%), gradient elution 55% to 95% over 21 min.....             | <b>96</b>  |
| <b>1,4-disubstituted 1,2,3-triazole member 2{7,8}</b> . HPLC (CH <sub>3</sub> OH : H <sub>2</sub> O) R <sub>T</sub> 16.53 (96%).....                                                      | <b>96</b>  |
| <b>1,4-disubstituted 1,2,3-triazole member 2{7,9}</b> . HPLC (CH <sub>3</sub> OH : H <sub>2</sub> O) R <sub>T</sub> 14.96 (86%).....                                                      | <b>97</b>  |
| <b>1,4-disubstituted 1,2,3-triazole member 2{8,1}</b> . HPLC (CH <sub>3</sub> OH : H <sub>2</sub> O) R <sub>T</sub> 17.71 (92%).....                                                      | <b>97</b>  |
| <b>1,4-disubstituted 1,2,3-triazole member 2{8,2}</b> . HPLC (1% AcOH in CH <sub>3</sub> OH : H <sub>2</sub> O) R <sub>T</sub> 4.18 (81%), gradient elution 30% to 90% over 9 min.....    | <b>98</b>  |
| <b>1,4-disubstituted 1,2,3-triazole member 2{8,3}</b> . HPLC (CH <sub>3</sub> OH : H <sub>2</sub> O) R <sub>T</sub> 15.13 (84%).....                                                      | <b>98</b>  |
| <b>1,4-disubstituted 1,2,3-triazole member 2{8,4}</b> . HPLC (CH <sub>3</sub> OH : H <sub>2</sub> O) R <sub>T</sub> 13.99 (94%).....                                                      | <b>99</b>  |
| <b>1,4-disubstituted 1,2,3-triazole member 2{8,5}</b> . HPLC (CH <sub>3</sub> OH : H <sub>2</sub> O) R <sub>T</sub> 15.00 (98%).....                                                      | <b>99</b>  |
| <b>1,4-disubstituted 1,2,3-triazole member 2{8,6}</b> . HPLC (CH <sub>3</sub> OH : H <sub>2</sub> O) R <sub>T</sub> 10.37 (81%), gradient elution 55% to 95% over 21 min.....             | <b>100</b> |
| <b>1,4-disubstituted 1,2,3-triazole member 2{8,7}</b> . HPLC (CH <sub>3</sub> OH : H <sub>2</sub> O) R <sub>T</sub> 14.56 (98%), gradient elution 55% to 95% over 21 min.....             | <b>100</b> |
| <b>1,4-disubstituted 1,2,3-triazole member 2{8,8}</b> . HPLC (CH <sub>3</sub> OH : H <sub>2</sub> O) R <sub>T</sub> 19.70 (98%).....                                                      | <b>101</b> |
| <b>1,4-disubstituted 1,2,3-triazole member 2{8,9}</b> . HPLC (CH <sub>3</sub> OH : H <sub>2</sub> O) R <sub>T</sub> 18.19 (90%).....                                                      | <b>101</b> |
| <b>1,4-disubstituted 1,2,3-triazole member 2{9,1}</b> . HPLC (1% AcOH in CH <sub>3</sub> OH : H <sub>2</sub> O) R <sub>T</sub> 2.50 (100%), gradient elution 30% to 90% over 26 min. .... | <b>102</b> |
| <b>1,4-disubstituted 1,2,3-triazole member 2{9,2}</b> . HPLC (1% AcOH in CH <sub>3</sub> OH : H <sub>2</sub> O) R <sub>T</sub> 2.51 (89%), gradient elution 30% to 90% over 21 min. ....  | <b>102</b> |
| <b>1,4-disubstituted 1,2,3-triazole member 2{9,3}</b> . HPLC (1% AcOH in CH <sub>3</sub> OH : H <sub>2</sub> O) R <sub>T</sub> 2.51 (100%), gradient elution 30% to 90% over 26 min. .... | <b>103</b> |
| <b>1,4-disubstituted 1,2,3-triazole member 2{9,4}</b> . HPLC (CH <sub>3</sub> OH : H <sub>2</sub> O) R <sub>T</sub> 15.12 (82%).....                                                      | <b>103</b> |
| <b>1,4-disubstituted 1,2,3-triazole member 2{9,5}</b> . HPLC (1% AcOH in CH <sub>3</sub> OH : H <sub>2</sub> O) R <sub>T</sub> 2.51 (84%), gradient elution 30% to 90% over 21 min. ....  | <b>104</b> |
| <b>1,4-disubstituted 1,2,3-triazole member 2{9,6}</b> . HPLC (CH <sub>3</sub> OH : H <sub>2</sub> O) R <sub>T</sub> 8.85 (90%), gradient elution 55% to 95% over 21 min.....              | <b>104</b> |
| <b>1,4-disubstituted 1,2,3-triazole member 2{9,7}</b> . HPLC (CH <sub>3</sub> OH : H <sub>2</sub> O) R <sub>T</sub> 12.84 (98%), gradient elution 55% to 95% over 21 min.....             | <b>105</b> |
| <b>1,4-disubstituted 1,2,3-triazole member 2{9,8}</b> . HPLC (CH <sub>3</sub> OH : H <sub>2</sub> O) R <sub>T</sub> 18.94 (81%).....                                                      | <b>105</b> |
| <b>1,4-disubstituted 1,2,3-triazole member 2{9,9}</b> . HPLC (CH <sub>3</sub> OH : H <sub>2</sub> O) R <sub>T</sub> 14.20 (100%), gradient elution 55% to 95% over 21 min.....            | <b>106</b> |

|                                                                                                                                                                                            |            |
|--------------------------------------------------------------------------------------------------------------------------------------------------------------------------------------------|------------|
| <b>1,4-disubstituted 1,2,3-triazole member 2{10,1}</b> . HPLC (1% AcOH in CH <sub>3</sub> OH : H <sub>2</sub> O) R <sub>T</sub> 2.54 (83%), gradient elution 30% to 90% over 21 min.....   | <b>106</b> |
| <b>1,4-disubstituted 1,2,3-triazole member 2{10,2}</b> . HPLC (1% AcOH in CH <sub>3</sub> OH : H <sub>2</sub> O) R <sub>T</sub> 2.65 (100%), gradient elution 30% to 90% over 21 min. .... | <b>107</b> |
| <b>1,4-disubstituted 1,2,3-triazole member 2{10,3}</b> . HPLC (CH <sub>3</sub> OH : H <sub>2</sub> O) R <sub>T</sub> 14.43 (84%), gradient elution 55% to 95% over 21 min.....             | <b>107</b> |
| <b>1,4-disubstituted 1,2,3-triazole member 2{10,4}</b> . HPLC (CH <sub>3</sub> OH : H <sub>2</sub> O) R <sub>T</sub> 10.11 (84%), gradient elution 55% to 95% over 21 min.....             | <b>108</b> |
| <b>1,4-disubstituted 1,2,3-triazole member 2{10,5}</b> . HPLC (1% AcOH in CH <sub>3</sub> OH : H <sub>2</sub> O) R <sub>T</sub> 2.52 (100%), gradient elution 30% to 90% over 26 min. .... | <b>108</b> |
| <b>1,4-disubstituted 1,2,3-triazole member 2{10,6}</b> . HPLC (CH <sub>3</sub> OH : H <sub>2</sub> O) R <sub>T</sub> 11.85 (82%), gradient elution 55% to 95% over 21 min.....             | <b>109</b> |
| <b>1,4-disubstituted 1,2,3-triazole member 2{10,7}</b> . HPLC (CH <sub>3</sub> OH : H <sub>2</sub> O) R <sub>T</sub> 16.73 (94%), gradient elution 55% to 95% over 21 min.....             | <b>109</b> |
| <b>1,4-disubstituted 1,2,3-triazole member 2{10,8}</b> . HPLC (CH <sub>3</sub> OH : H <sub>2</sub> O) R <sub>T</sub> 14.47 (82%). ....                                                     | <b>110</b> |
| <b>1,4-disubstituted 1,2,3-triazole member 2{10,9}</b> . HPLC (1% AcOH in CH <sub>3</sub> OH : H <sub>2</sub> O) R <sub>T</sub> 3.40 (100%), gradient elution 30% to 90% over 20 min. .... | <b>110</b> |
| <b>1,4-disubstituted 1,2,3-triazole member 2{11,1}</b> . HPLC (CH <sub>3</sub> OH : H <sub>2</sub> O) R <sub>T</sub> 16.80 (86%). ....                                                     | <b>111</b> |
| <b>1,4-disubstituted 1,2,3-triazole member 2{11,2}</b> . HPLC (CH <sub>3</sub> OH : H <sub>2</sub> O) R <sub>T</sub> 14.34 (96%). ....                                                     | <b>111</b> |
| <b>1,4-disubstituted 1,2,3-triazole member 2{11,3}</b> . HPLC (CH <sub>3</sub> OH : H <sub>2</sub> O) R <sub>T</sub> 14.66 (86%). ....                                                     | <b>112</b> |
| <b>1,4-disubstituted 1,2,3-triazole member 2{11,4}</b> . HPLC (CH <sub>3</sub> OH : H <sub>2</sub> O) R <sub>T</sub> 16.15 (86%). ....                                                     | <b>112</b> |
| <b>1,4-disubstituted 1,2,3-triazole member 2{11,5}</b> . HPLC (CH <sub>3</sub> OH : H <sub>2</sub> O) R <sub>T</sub> 16.67 (98%). ....                                                     | <b>113</b> |
| <b>1,4-disubstituted 1,2,3-triazole member 2{11,6}</b> . HPLC (CH <sub>3</sub> OH : H <sub>2</sub> O) R <sub>T</sub> 15.32 (81%). ....                                                     | <b>113</b> |
| <b>1,4-disubstituted 1,2,3-triazole member 2{11,7}</b> . HPLC (CH <sub>3</sub> OH : H <sub>2</sub> O) R <sub>T</sub> 19.41 (100%). ....                                                    | <b>114</b> |
| <b>1,4-disubstituted 1,2,3-triazole member 2{11,8}</b> . HPLC (CH <sub>3</sub> OH : H <sub>2</sub> O) R <sub>T</sub> 19.88 (95%). ....                                                     | <b>114</b> |
| <b>1,4-disubstituted 1,2,3-triazole member 2{11,9}</b> . HPLC (CH <sub>3</sub> OH : H <sub>2</sub> O) R <sub>T</sub> 17.04 (95%). ....                                                     | <b>115</b> |
| <b>1,4-disubstituted 1,2,3-triazole member 2{12,1}</b> . HPLC (CH <sub>3</sub> OH : H <sub>2</sub> O) R <sub>T</sub> 20.38 (81%), gradient elution 55% to 95% over 35 min.....             | <b>115</b> |
| <b>1,4-disubstituted 1,2,3-triazole member 2{12,2}</b> . HPLC (CH <sub>3</sub> OH : H <sub>2</sub> O) R <sub>T</sub> 20.29 (97%), gradient elution 55% to 95% over 35 min.....             | <b>116</b> |
| <b>1,4-disubstituted 1,2,3-triazole member 2{12,3}</b> . HPLC (1% AcOH in CH <sub>3</sub> OH : H <sub>2</sub> O) R <sub>T</sub> 2.90 (93%), gradient elution 30% to 90% over 13 min.....   | <b>116</b> |
| <b>1,4-disubstituted 1,2,3-triazole member 2{12,4}</b> . HPLC (CH <sub>3</sub> OH : H <sub>2</sub> O) R <sub>T</sub> 12.17 (81%), gradient elution 55% to 95% over 21 min.....             | <b>117</b> |
| <b>1,4-disubstituted 1,2,3-triazole member 2{12,5}</b> . HPLC (CH <sub>3</sub> OH : H <sub>2</sub> O) R <sub>T</sub> 14.48 (98%), gradient elution 55% to 95% over 21 min.....             | <b>117</b> |
| <b>1,4-disubstituted 1,2,3-triazole member 2{12,6}</b> . HPLC (CH <sub>3</sub> OH : H <sub>2</sub> O) R <sub>T</sub> 11.41 (84%), gradient elution 55% to 95% over 21 min.....             | <b>118</b> |
| <b>1,4-disubstituted 1,2,3-triazole member 2{12,7}</b> . HPLC (CH <sub>3</sub> OH : H <sub>2</sub> O) R <sub>T</sub> 15.25 (96%), gradient elution 55% to 95% over 21 min.....             | <b>118</b> |
| <b>1,4-disubstituted 1,2,3-triazole member 2{12,8}</b> . HPLC (CH <sub>3</sub> OH : H <sub>2</sub> O) R <sub>T</sub> 13.92 (84%), gradient elution 55% to 95% over 21 min.....             | <b>119</b> |
| <b>1,4-disubstituted 1,2,3-triazole member 2{12,9}</b> . HPLC (CH <sub>3</sub> OH : H <sub>2</sub> O) R <sub>T</sub> 10.99 (82%), gradient elution 55% to 95% over 21 min.....             | <b>119</b> |
| <b>Table 2</b> . Mass of molecular ion peak (MW+H) of the 1,4-disubstituted 1,2,3-triazole library members .....                                                                           | <b>120</b> |

## Biological data of 1,4-disubstituted 1,2,3-triazole members

**Table 1.** FRET screening of 1,4-disubstituted 1,2,3-triazole binding affinity for model RNAs AM1A and C11U

| Compd                     | $\Delta F_{AM1A}(\%)$ | $\Delta F_{C11U}(\%)$ | Compd         | $\Delta F_{AM1A}(\%)$ | $\Delta F_{C11U}(\%)$ | Compd          | $\Delta F_{AM1A}(\%)$ | $\Delta F_{C11U}(\%)$ |
|---------------------------|-----------------------|-----------------------|---------------|-----------------------|-----------------------|----------------|-----------------------|-----------------------|
| <b>ANB-22<sup>b</sup></b> | 8.53                  | 19.53                 | <b>2{5,4}</b> | 16.79                 | 21.12                 | <b>2{9,1}</b>  | 6.34                  | 10.95                 |
| <b>ANB-40</b>             | 7.67                  | 13.38                 | <b>2{5,6}</b> | 11.30                 | 12.74                 | <b>2{9,3}</b>  | 6.34                  | 13.35                 |
| <b>2{1,1}</b>             | 11.66                 | 15.17                 | <b>2{5,7}</b> | 29.72                 | 25.65                 | <b>2{9,4}</b>  | 13.95                 | 23.19                 |
| <b>2{1,2}</b>             | -6.61                 | -7.73                 | <b>2{5,8}</b> | 14.51                 | 22.54                 | <b>2{9,5}</b>  | 5.86                  | 13.32                 |
| <b>2{1,6}</b>             | 32.93                 | 34.73                 | <b>2{5,9}</b> | 6.53                  | 15.14                 | <b>2{9,6}</b>  | 0.27                  | 2.96                  |
| <b>2{2,1}</b>             | 14.12                 | 13.46                 | <b>2{6,3}</b> | 14.94                 | 20.05                 | <b>2{9,7}</b>  | 9.17                  | 8.65                  |
| <b>2{2,2}</b>             | 5.10                  | 7.80                  | <b>2{6,4}</b> | 11.73                 | 15.73                 | <b>2{9,8}</b>  | 12.83                 | 16.15                 |
| <b>2{2,3}</b>             | 3.39                  | 3.59                  | <b>2{6,6}</b> | 4.48                  | 4.12                  | <b>2{9,9}</b>  | 5.33                  | 12.22                 |
| <b>2{2,4}</b>             | 19.50                 | 25.03                 | <b>2{6,7}</b> | 12.75                 | 13.34                 | <b>2{10,4}</b> | 22.60                 | 24.76                 |
| <b>2{2,6}</b>             | 5.85                  | 11.85                 | <b>2{6,8}</b> | 18.23                 | 14.55                 | <b>2{10,5}</b> | 6.08                  | 10.78                 |
| <b>2{2,7}</b>             | 18.92                 | 23.73                 | <b>2{6,9}</b> | 8.00                  | 14.12                 | <b>2{10,6}</b> | 20.05                 | 24.05                 |
| <b>2{2,8}</b>             | 15.65                 | 17.37                 | <b>2{7,1}</b> | 10.68                 | 11.57                 | <b>2{10,7}</b> | 23.00                 | 28.49                 |
| <b>2{2,9}</b>             | 15.23                 | 16.01                 | <b>2{7,2}</b> | 9.39                  | 14.36                 | <b>2{10,8}</b> | 0.50                  | 8.57                  |
| <b>2{3,1}</b>             | 7.02                  | 9.63                  | <b>2{7,3}</b> | 14.18                 | 13.82                 | <b>2{10,9}</b> | -16.24                | -11.39                |
| <b>2{3,4}</b>             | 11.70                 | 18.05                 | <b>2{7,4}</b> | 11.74                 | 23.19                 | <b>2{11,1}</b> | 8.46                  | 12.98                 |
| <b>2{3,7}</b>             | 28.48                 | 26.13                 | <b>2{7,5}</b> | 5.50                  | 14.99                 | <b>2{11,4}</b> | 16.09                 | 20.19                 |
| <b>2{3,8}</b>             | -4.36                 | -2.69                 | <b>2{7,6}</b> | 3.48                  | 9.97                  | <b>2{11,7}</b> | 17.95                 | 18.22                 |
| <b>2{3,9}</b>             | -2.50                 | 3.28                  | <b>2{7,7}</b> | 6.87                  | 15.90                 | <b>2{11,8}</b> | 6.99                  | 11.15                 |
| <b>2{4,1}</b>             | 20.43                 | 24.49                 | <b>2{7,8}</b> | 6.03                  | 19.98                 | <b>2{12,1}</b> | 9.64                  | 16.31                 |
| <b>2{4,2}</b>             | 2.51                  | 9.71                  | <b>2{7,9}</b> | 6.07                  | 12.98                 | <b>2{12,2}</b> | 7.34                  | 8.04                  |
| <b>2{4,3}</b>             | 19.92                 | 27.38                 | <b>2{8,1}</b> | 24.09                 | 29.09                 | <b>2{12,3}</b> | 7.93                  | 12.85                 |
| <b>2{4,5}</b>             | 13.01                 | 25.07                 | <b>2{8,2}</b> | 15.07                 | 17.68                 | <b>2{12,4}</b> | 13.47                 | 22.72                 |
| <b>2{4,6}</b>             | 9.94                  | 14.39                 | <b>2{8,3}</b> | 18.43                 | 19.55                 | <b>2{12,5}</b> | 5.24                  | 10.51                 |
| <b>2{4,7}</b>             | 25.51                 | 22.32                 | <b>2{8,4}</b> | 14.54                 | 28.75                 | <b>2{12,6}</b> | 10.16                 | 13.94                 |
| <b>2{4,8}</b>             | 16.43                 | 22.17                 | <b>2{8,5}</b> | 16.07                 | 20.17                 | <b>2{12,7}</b> | 25.78                 | 26.08                 |
| <b>2{4,9}</b>             | 16.21                 | 21.38                 | <b>2{8,6}</b> | 9.89                  | 10.52                 | <b>2{12,8}</b> | 6.97                  | 14.61                 |
| <b>2{5,1}</b>             | 21.65                 | 32.76                 | <b>2{8,8}</b> | 19.60                 | 23.21                 | <b>2{12,9}</b> | 12.25                 | 19.17                 |

<sup>a</sup> the relative fluorescence intensity change  $\Delta F$  was calculated by  $\Delta F = [(F - F_0)/F_0] * 100$ , where F is the fluorescence intensity with ligand and  $F_0$  is without ligand at 585 nm upon excitation at 467 nm.<sup>b</sup> All of the compounds were tested at a final concentration of 10  $\mu$ M.



## Procedures for Precursors and selected Library Members

### General Procedures.

All reagents and starting materials were purchased from commercial suppliers. All reactions were conducted under an atmosphere of argon unless otherwise noted. Poly(4-vinylpyridine), cross-linked 2% cross-linked with divinylbenzene powder was purchased from Aldrich and used as a scavenger for copper ions. Workup of 1,2,3-triazole compounds were carried out using Isolute SPE phase separators purchased from Biotage. Purification of desired products were carried out using flash chromatography on silica gel (230-400 mesh) purchased from Silicycle. Triethylamine was distilled from calcium hydride prior to use. THF and DCM were dried over a column of dried alumina under an atmosphere of nitrogen.  $^1\text{H}$  and  $^{13}\text{C}$ -NMR spectra were garnered on a Bruker AG 300 MHz spectrometer in  $\text{CDCl}_3$  and referenced to TMS. HPLC data were obtained on Shimadzu using Supelco discovery C8 column (15cm x 4.6 mm, 5  $\mu\text{m}$ ), eluting at 1 mL/min with a gradient elution starting at 55% of MeOH- $\text{H}_2\text{O}$  going to 95% over 26 minutes as the mobile phase eluant unless otherwise stated. Retention times are reported in minutes. Mass verifications were carried out on a Shimadzu 2010A LC/MS using APCI probe. IR data were acquired on a Shimadzu Advantage FTIR-8400. Melting points were obtained on a Mel-temp II, from laboratory devices, USA.

### General method A for glycidyl ester 6a-c synthesis.

To a solution of glycidol **5** (100 mol%) in  $\text{CH}_2\text{Cl}_2$  (1.35 M) at 0 °C was added DMAP (120 mol%). The reaction mixture was stirred for 30 minutes and the acid chloride (120 mol%) was added. The reaction was warmed to room temperature and stirring was continued at room temperature under argon atmosphere for 4 h. The reaction mixture was poured through a silica

gel pad, washed with CH<sub>2</sub>Cl<sub>2</sub> (100 mL), filtered, concentrated and chromatographed (25% EtOAc in hexanes) to provide the desired glycidyl esters **6a-c**.

**General method B for glycidyl carbamate 8a-b synthesis.**

To a solution of allyl alcohol **7** (100 mol%) in CH<sub>2</sub>Cl<sub>2</sub> (1.72 M) at 0 °C was added Et<sub>3</sub>N (300 mol%) and DMAP (2 mol%). The reaction mixture was stirred at 0 °C for 30 minutes and the required isocyanate (120 mol%) was added. The reaction was warmed to rt and stirring was continued for 4 h. The reaction mixture was washed with 1 M HCl (3x), saturated NaHCO<sub>3</sub> (3x), H<sub>2</sub>O (3x), brine (2x), dried over MgSO<sub>4</sub>, filtered, concentrated, and chromatographed (50% EtOAc in hexanes) to provide the allyl carbamate. Without further purification, the allyl carbamate was used in the next step of the reaction. To a solution of allyl carbamate (100 mol%) in CH<sub>2</sub>Cl<sub>2</sub> (0.53 M) at 0 °C was added mCPBA (120 mol%). The reaction mixture was gradually warmed to room temperature and stirred 16 h. The reaction mixture was diluted with Et<sub>2</sub>O, washed with 1 M NaOH (3x), dried over MgSO<sub>4</sub>, filtered, concentrated, and chromatographed (50% EtOAc in hexanes) to provide carbamoyl epoxides **8a** and **8b**.

**Oxiran-2-ylmethyl octanoate (6a).**

Glycidol **5** (1.1 g, 15 mmol) was reacted with octanoyl chloride (3.1 mL, 2.9 g, 18 mmol) following general method A for glycidyl esters to afford 2.7 g (91%) of the ester **6a** as pale yellow oil that matched analytical data previously reported.<sup>1</sup> <sup>1</sup>H NMR (CDCl<sub>3</sub>, 300 MHz) δ 3.92 (dd, *J* = 3.1, 12.3, 1H), 3.42 (dd, *J* = 6.3, 12.3, 1H), 2.72-2.69 (m, 1H), 2.33 (t, *J* = 4.9, 1H), 2.15 (dd, *J* = 2.6, 5.0, 1H), 1.87 (t, *J* = 7.4, 2H), 1.23-1.09 (m, 2H), 0.93-0.73 (m, 8H), 0.42 (t, *J* = 6.8, 3H).

**Oxiran-2-ylmethyl benzoate (6b).**

Glycidol **5** (1.1 g, 15 mmol) was reacted with benzoyl chloride (2.5 g, 18 mmol) following general method A for glycidyl esters to afford 2.4 g (90%) of the ester **6b** as yellow oil that matched analytical data previously reported.<sup>2</sup> <sup>1</sup>H NMR (CDCl<sub>3</sub>, 300 MHz) δ 8.07 (d, *J* = 7.2, 2H), 7.57 (t, *J* = 7.2, 1H), 7.45 (t, *J* = 7.1, 2H), 4.65 (dd, *J* = 1.0, 3.1, 1H), 4.19 (dd, *J* = 6.2, 12.3, 1H), 3.37-3.31 (m, 1H), 2.98 (t, *J* = 4.9, 1H), 2.74-2.72 (m, 1H). <sup>13</sup>C NMR (CDCl<sub>3</sub>, 75 MHz) δ 166.3, 133.2, 129.7, 128.4, 65.4, 49.5, 44.7.

**Oxiran-2-ylmethyl cyclohexanecarboxylate (6c).**

Glycidol **5** (1.1 g, 15 mmol) was reacted with cyclohexanecarbonyl chloride (2.6 g, 18 mmol) following general method A for glycidyl esters to afford 2.6 g (93%) of the ester **6c** as colorless oil that matched analytical data previously reported.<sup>3</sup> <sup>1</sup>H NMR (CDCl<sub>3</sub>, 300 MHz) δ 4.21 (dd, *J* = 3, 12.3, 1H), 3.74 (dd, *J* = 6.1, 12.3, 1H), 3.02-2.99 (m, 1H), 2.64 (t, *J* = 4.6, 1H), 2.46 (dd, *J* = 2.6, 4.9, 1H), 1.74 (d, *J* = 12.4, 2H), 1.67-1.42 (m, 3H), 1.40-1.21 (m, 2H), 1.21-0.99 (m, 3H). <sup>13</sup>C NMR (CDCl<sub>3</sub>, 75 MHz) δ 175.2, 64.3, 49.1, 44.2, 42.8, 28.8, 25.57, 25.19.

**Oxiran-2-ylmethyl benzylcarbamate (8a).**

Benzyl carbamate (1.13 g, 6.1 mmol) prepared from allyl alcohol **7** was reacted with mCPBA (1.26 g, 7.3 mmol) following general method B for glycidyl carbamates to afford 1.0 g (80%) of the carbamate **8a** as a yellow oil that matched analytical data previously reported.<sup>4</sup> <sup>1</sup>H NMR (CDCl<sub>3</sub>, 300 MHz) δ 7.36-7.26 (m, 5H); 5.20 (s, 1H), 4.45 (dd, *J* = 2.9, 12.2, 1H), 4.36 (d, *J* = 6.0, 2H), 3.90 (dd, *J* = 6.3, 12.2, 1H), 3.21-3.17 (m, 1H), 2.82 (t, *J* = 4.6, 1H), 2.62 (dd, *J* = 2.4, 4.4, 1H). <sup>13</sup>C NMR (CDCl<sub>3</sub>, 75 MHz) δ 156.1, 138.3, 128.7, 127.6, 127.5, 65.6, 49.8, 45.2, 44.6.

**Oxiran-2-ylmethyl butylcarbamate (8b).**

Butyl carbamate (1.60 g, 10.5 mmol) prepared from allyl alcohol **7** was reacted with mCPBA (2.17 g, 12.6 mmol) following general method B for glycidyl carbamates to afford 1.5 g (82%) of

the carbamate **8b** as yellow oil.  $^1\text{H}$  NMR ( $\text{CDCl}_3$ , 300 MHz)  $\delta$  5.00 (s, 1H); 4.42 (dd,  $J = 2.7$ , 12.2, 1H), 3.87 (dd,  $J = 6.3$ , 12.2, 1H), 3.21-3.14 (m, 3H), 2.83 (t,  $J = 4.7$ , 1H), 2.64 (dd,  $J = 2.6$ , 4.8, 1H), 1.54-1.44 (m, 2H), 1.41-1.28 (m, 2H), 0.92 (t,  $J = 7.2$ , 3H).  $^{13}\text{C}$  NMR ( $\text{CDCl}_3$ , 75 MHz)  $\delta$  156.2, 65.3, 49.9, 44.6, 40.8, 32.0, 19.9, 13.7.

**General method A for the synthesis of azide components 3{1-3}, 3{4-5} & 3{6-9}.**

To a mixture of epoxide (100 mol%) and  $\text{NH}_4\text{Cl}$  (200 mol%) in MeOH and  $\text{H}_2\text{O}$  (0.28 M, 8:1) was added  $\text{NaN}_3$  (800 mol%) and the reaction mixture was stirred at room temperature for 24 h. The reaction mixture was concentrated to 1/10 its volume, diluted with  $\text{H}_2\text{O}$  and extracted with EtOAc (3x). The combined organic layers were washed with brine (2x), dried over  $\text{MgSO}_4$ , filtered, concentrated, and chromatographed (35% EtOAc in hexanes) to provide azide compounds 3{1-3}, 3{4-5} & 3{6-9}.

**General method B for the synthesis of azide components 3{10-12}.**

To a solution of *trans*-2-azidocyclohexanol 3{9} (100 mol%) in  $\text{CH}_2\text{Cl}_2$  (0.71 M) at 0 °C was added  $\text{Et}_3\text{N}$  (300 mol%) and DMAP (2 mol%). The reaction mixture was stirred for 30 minutes and the acid chloride (120 mol%) was added. The reaction was gradually warmed to room temperature and stirred for 16 h under an argon atmosphere. The reaction mixture was washed with 1 M HCl (3x), saturated  $\text{NaHCO}_3$  (3x),  $\text{H}_2\text{O}$  (3x), brine (2x), dried over  $\text{MgSO}_4$ , filtered, concentrated, and chromatographed (25% EtOAc in hexanes) to provide compounds 3{10-12}.

**3-azido-2-hydroxypropyl octanoate 3{1}.**

Glycidyl octanoate **6a** (1.13 g, 5.6 mmol) was reacted with  $\text{NaN}_3$  (3.6 g, 56 mmol) following the general method A for azide compounds syntheses to afford 1.1 g (77%) of the azide 3{1} as a pale yellow oil.  $^1\text{H}$  NMR ( $\text{CDCl}_3$ , 300 MHz)  $\delta$  4.15 (dd,  $J = 5.2$ , 12.2, 1H), 4.10 (dd,  $J = 5.2$ , 12.2, 1H), 4.04-3.97 (m, 1H), 3.41 (dd,  $J = 5.9$ , 12.8, 1H), 3.35 (dd,  $J = 5.9$ , 12.8, 1H), 3.03 (d,  $J$

= 5.0, 1H), 2.33 (t,  $J = 7.5$ , 2H), 1.66-1.56 (m, 2H), 1.35-1.21 (m, 8H), 0.86 (t,  $J = 6.9$ , 3H).  $^{13}\text{C}$  NMR ( $\text{CDCl}_3$ , 75 MHz)  $\delta$  174.8, 69.6, 66.1, 54.1, 34.7, 32.3, 29.7, 29.5, 25.5, 23.2, 14.7. IR ( $\text{CDCl}_3$ ) 2100  $\text{cm}^{-1}$ .

**3-azido-2-hydroxypropyl benzoate 3{2}**.

Glycidyl benzoate **6b** (1.1 g, 6.2 mmol) was reacted with  $\text{NaN}_3$  (4.0 g, 62 mmol) following the general method A for azide compounds syntheses to afford 1.0 g (81%) of the azide **3{2}** as an orange-yellow oil that matched analytical data previously reported.<sup>5</sup>  $^1\text{H}$  NMR ( $\text{CDCl}_3$ , 300 MHz)  $\delta$  8.04 (d,  $J = 7.3$ , 2H), 7.58 (t,  $J = 7.2$ , 1H), 7.44 (t,  $J = 7.9$ , 2H), 4.44 (dd,  $J = 5.3$ , 20.5, 1H), 4.36 (dd,  $J = 5.3$ , 20.5, 1H), 4.21-4.12 (m, 1H), 3.51 (dd,  $J = 5.5$ , 13.0, 1H), 3.46 (dd,  $J = 5.5$ , 13.0, 1H), 3.22 (d,  $J = 4.4$ , 1H).  $^{13}\text{C}$  NMR ( $\text{CDCl}_3$ , 75 MHz)  $\delta$  166.8, 133.5, 129.7, 129.4, 128.5, 69.1, 66.1, 53.56. IR ( $\text{CDCl}_3$ ) 2106  $\text{cm}^{-1}$ .

**3-azido-2-hydroxypropyl cyclohexanecarboxylate 3{3}**.

Glycidyl cyclohexanecarboxylate **6c** (1.13 g, 6.1 mmol) was reacted with  $\text{NaN}_3$  (4 g, 61 mmol) following the general method A for azide compounds syntheses to afford 1.12 g (81%) of the azide **3{3}** as a pale yellow oil.  $^1\text{H}$  NMR ( $\text{CDCl}_3$ , 300 MHz)  $\delta$  4.11 (dd,  $J = 5.4$ , 20.4, 1H), 4.03 (dd,  $J = 5.4$ , 20.4, 1H), 3.99-3.89 (m, 1H); 3.36 (dd,  $J = 5.0$ , 12.7, 1H), 3.29 (dd,  $J = 5.0$ , 12.7, 1H), 3.00 (d,  $J = 5.0$ , 1H), 2.28 (tt,  $J = 3.6$ , 11.2, 1H), 1.90-1.79 (m, 2H), 1.75-1.53 (m, 3H), 1.45-1.10 (m, 5H),  $^{13}\text{C}$  NMR ( $\text{CDCl}_3$ , 75 MHz)  $\delta$  176.3, 69.0, 65.3, 53.5, 43.0, 29.0, 25.6, 25.3. IR ( $\text{CDCl}_3$ ) 2100  $\text{cm}^{-1}$ .

**3-azido-2-hydroxypropyl benzylcarbamate 3{4}**.

Glycidyl benzylcarbamate **8a** (0.97 g, 3.8 mmol) was reacted with  $\text{NaN}_3$  (2.5 g, 38 mmol) following the general method A for azide compounds syntheses to afford 0.87 g (77%) of the azide **3{4}** as an orange-yellow oil.  $^1\text{H}$  NMR ( $\text{CDCl}_3$ , 300 MHz)  $\delta$  7.40-7.23 (m, 5H), 5.27 (s,

1H), 4.36 (d,  $J = 5.2$ , 2H), 4.19 (dd,  $J = 4.3, 12.1$ , 1H), 4.14 (dd,  $J = 4.3, 12.1$ , 1H), 4.02-3.89 (m, 1H), 3.37-3.20 (m, 3H).  $^{13}\text{C}$  NMR ( $\text{CDCl}_3$ , 75 MHz)  $\delta$  156.5, 137.7, 128.5, 127.4, 127.3, 69.3, 66.4, 53.1, 44.95. IR ( $\text{CDCl}_3$ ) 2100  $\text{cm}^{-1}$ .

### **3-azido-2-hydroxypropyl butylcarbamate 3{5}**

Glycidyl butylcarbamate **8b** (0.93 g, 4.3 mmol) was reacted with  $\text{NaN}_3$  (2.8 g, 43 mmol) following the general method A for azide compounds syntheses to afford 0.91 g (81%) of the carbamate **3{5}** as an orange-yellow oil.  $^1\text{H}$  NMR ( $\text{CDCl}_3$ , 300 MHz)  $\delta$  4.90 (bs, 1H), 4.20-4.09 (m, 2H), 4.04-3.95 (m, 1H), 3.43-3.29 (m, 3H), 3.18 (q,  $J = 6.5$ , 2H), 1.50-1.43 (m, 2H), 1.42-1.28 (m, 2H), 0.93 (t,  $J = 7.3$ , 3H),  $^{13}\text{C}$  NMR ( $\text{CDCl}_3$ , 75 MHz)  $\delta$  155.3, 68.1, 64.9, 51.9, 39.4, 30.4, 18.3, 12.1. IR ( $\text{CDCl}_3$ ) 2100  $\text{cm}^{-1}$ .

### **2-azido-1-phenylethanol 3{6}**.

Styrene oxide **9a** (1.2 g, 10 mmol) was reacted with  $\text{NaN}_3$  (6.5 g, 100 mmol) following the general method A for azide compounds syntheses to afford 1.5 g (92%) of the azide **3{6}** as a yellow oil that matched analytical data previously reported.<sup>6</sup>  $^1\text{H}$  NMR ( $\text{CDCl}_3$ , 500 MHz)  $\delta$  7.43-7.31 (m, 5H), 4.66 (t,  $J = 6.5$ , 1H), 3.75 (t,  $J = 6.0$ , 2H), 2.08 (t,  $J = 6.0$ , 1H);  $^{13}\text{C}$  NMR ( $\text{CDCl}_3$ , 75 MHz)  $\delta$  135.5, 128.1, 127.9, 126.4, 67.1, 65.7. IR ( $\text{CDCl}_3$ ) 2100  $\text{cm}^{-1}$

### **1-azidohexan-2-ol 3{7}**.

2-Butyloxirane **9b** (1.0 g, 10 mmol) was reacted with  $\text{NaN}_3$  (6.5 g, 100 mmol) following the general method A for azide compounds syntheses to afford 1.35 g (94%) of the azide **3{7}** as a colorless oil that matched analytical data previously reported.<sup>7</sup>  $^1\text{H}$  NMR ( $\text{CDCl}_3$ , 300 MHz)  $\delta$  3.84-3.68 (m, 1H), 3.38 (dd,  $J = 3.4, 12.4$ , 1H), 3.25 (dd,  $J = 7.4, 12.4$ , 1H), 2.00 (s, 1H), 1.56-1.25 (m, 6H), 0.92 (t,  $J = 6.9$ , 3H).  $^{13}\text{C}$  NMR ( $\text{CDCl}_3$ , 75 MHz)  $\delta$  70.3, 56.6, 33.5, 27.1, 22.1, 13.4. IR ( $\text{CDCl}_3$ ) 2100  $\text{cm}^{-1}$ .

**1-azido-3-(benzyloxy)propan-2-ol 3{8}.**

Benzyl glycidylether **9c** (1.6 g, 10 mmol) was reacted with NaN<sub>3</sub> (6.5 g, 100 mmol) following the general method A for azide compounds syntheses to afford 1.95 g (93%) of the azide **3{8}** as a pale yellow oil that matched analytical data previously reported.<sup>8</sup> <sup>1</sup>H NMR (CDCl<sub>3</sub>, 300 MHz) δ 7.39-7.27 (m, 5H), 4.55 (s, 2H), 4.01-3.89 (m, 1H), 3.53 (dd, *J* = 4.4, 9.6, 1H), 3.48 (dd, *J* = 4.4, 9.6, 1H), 3.39 (dd, *J* = 6.0, 12.9, 1H), 3.34 (dd, *J* = 6.0, 12.9, 1H), 2.56 (d, *J* = 3.9, 1H). <sup>13</sup>C NMR (CDCl<sub>3</sub>, 75 MHz) δ 136.1, 127.1, 126.5, 126.5, 72.1, 69.8, 68.2, 52.0. IR (CDCl<sub>3</sub>) 2096 cm<sup>-1</sup>.

**Trans-2-azidocyclohexanol 3{9}.**

Cyclohexene oxide **9d** (1.0 g, 10 mmol) was reacted with NaN<sub>3</sub> following the general method A for azide compounds syntheses to afford 1.38 g (98%) of the azide **3{9}** as a white solid that matched analytical data previously reported.<sup>8</sup> <sup>1</sup>H NMR (CDCl<sub>3</sub>, 300 MHz) δ 3.37-3.26 (m, 1H), 3.18-3.05 (m, 1H), 2.22 (d, *J* = 3.5, 1H), 2.05-1.90 (m, 2H), 1.74-1.60 (m, 2H); 1.36-1.11 (m, 4H). <sup>13</sup>C NMR (CDCl<sub>3</sub>, 75 MHz) δ 72.4, 65.9, 31.9, 28.6, 23.1, 22.7. IR (CDCl<sub>3</sub>) 2096 cm<sup>-1</sup>.

**Trans-2-azidocyclohexyl benzoate 3{10}.**

2-Azido cyclohexanol **3{9}** (1.1 g, 11.3 mmol) was acylated with benzoyl chloride (2.0 g, 13.6 mmol) following general method B for azide synthesis to afford 2.1 g (92%) of the azide **3{10}** as a white solid that matched analytical data previously reported.<sup>9</sup> <sup>1</sup>H NMR (CDCl<sub>3</sub>, 300 MHz) δ 8.10 (d, *J* = 7.9, 2H), 7.58 (t, *J* = 7.2, 1H), 7.45 (t, *J* = 7.5, 2H), 5.00-4.89 (m, 1H), 3.63-3.51 (m, 1H), 2.29-2.05 (m, 2H), 1.83-1.72 (m, 2H), 1.54-1.27 (m, 4H). <sup>13</sup>C NMR (CDCl<sub>3</sub>, 75 MHz) δ 165.8, 133.1, 130.1, 129.7, 128.4, 76.0, 63.4, 30.5, 30.4, 23.8, 23.5. IR (CDCl<sub>3</sub>) 2100 cm<sup>-1</sup>. m.p 112-115 °C.

**Trans-2-azidocyclohexyl 2-phenylacetate 3{11}.**

2-Azido cyclohexanol 3{9} (0.5 g, 3.5 mmol) was acylated with phenylacetyl chloride (0.65 g, 4.2 mmol) following general method B for azide synthesis to afford 0.80 g, (88%) of the azide 3{11} as colorless oil. <sup>1</sup>H NMR (CDCl<sub>3</sub>, 300 MHz) δ 7.32-7.23 (m, 5H), 4.73-4.65 (m, 1H), 3.65 (s, 2H), 3.41-3.32 (m, 1H), 2.05-1.98 (m, 2H), 1.73-1.67 (m, 2H), 1.41-1.21 (m, 4H). <sup>13</sup>C NMR (CDCl<sub>3</sub>, 75 MHz) δ 170.9, 133.9, 129.3, 128.6, 127.1, 75.8, 63.1, 41.5, 30.4, 30.3, 23.7, 23.4. IR (CDCl<sub>3</sub>) 2100 cm<sup>-1</sup>

**Trans-2-azidocyclohexyl 2-phenoxyacetate 3{12}.**

2-Azido cyclohexanol 3{9} (0.51 g, 3.6 mmol) was acylated with phenoxyacetyl chloride (0.75 g, 4.4 mmol) following general method B for azide synthesis to afford 0.90 g (91%) of the azide 3{12} as colorless oil. <sup>1</sup>H NMR (CDCl<sub>3</sub>, 300 MHz) δ 7.31 (t, *J* = 7.6, 2H), 7.01 (t, *J* = 7.4, 1H), 6.94 (d, *J* = 8.0, 2H), 4.86-4.78 (m, 1H), 4.70 (d, *J* = 16.2, 1H), 4.64 (d, *J* = 16.2, 1H), 3.45-3.34 (m, 1H), 2.11-1.98 (m, 2H), 1.79-1.65 (m, 2H); 1.45-1.18 (m, 4H). <sup>13</sup>C NMR (CDCl<sub>3</sub>, 75 MHz) δ 168.3, 157.8, 129.6, 121.7, 114.7, 76.4, 65.3, 63.0, 30.4, 30.2, 23.7, 23.4. IR (CDCl<sub>3</sub>) 2096 cm<sup>-1</sup>.

**General method A for the synthesis of propargylamine derivatives 4{1-7}.**

To a solution of propargyl bromide **10** (120 mol%) in THF (0.84 M) was added a secondary amine **11** (100 mol%). The reaction mixture was stirred for 5 minutes and K<sub>2</sub>CO<sub>3</sub> (200 mol%) was added. The reaction mixture was heated at reflux for 24 h under an argon atmosphere. The reaction mixture was filtered, concentrated and chromatographed (50% EtOAc in hexane) to afford the propargyl amine derived alkynes 4{1-7}.



**General method B for the synthesis of propargylamine derivatives 4{8-9}.**

To a solution of N-methyl propargylamine **12** (100 mol%) in MeOH (1.45 M) was added alkyl bromide **13** (120 mol%). The reaction mixture was stirred for 5 minutes and K<sub>2</sub>CO<sub>3</sub> (200 mol%) was added. The reaction was heated at reflux for 24 h under an argon atmosphere. The reaction mixture was filtered, concentrated and chromatographed (50% EtOAc in hexane) to afford the propargyl amine derived alkyne **4{8}** and **4{9}**.

**N-butyl-N-(prop-2-ynyl)butan-1-amine 4{1}.**

Propargyl bromide **10** (1.1 g, 9.29 mmol) was reacted with dibutylamine **11a** (1.0 g, 7.74 mmol) following general method A for propargylamine synthesis to afford 0.93 g (72%) of the alkyne **4{1}** as an orange-yellow oil that matched analytical data previously reported.<sup>10</sup> <sup>1</sup>H NMR (CDCl<sub>3</sub>, 300 MHz) δ 3.40 (d, *J* = 2.3, 2H), 2.45 (t, *J* = 7.1, 4H), 2.15 (t, *J* = 2.3, 1H), 1.49-1.26 (m, 8H), 0.92 (t, *J* = 7.1, 6H). <sup>13</sup>C NMR (CDCl<sub>3</sub>, 75 MHz) δ 78.2, 71.7, 52.7, 41.0, 29.0, 19.9, 13.3.

**N-methyl-N-(3-phenylpropyl)prop-2-yn-1-amine 4{2}.**

Propargyl bromide **10** (1.0 g, 14.5 mmol) was reacted with N-methyl-3-phenylpropylamine **11b** (3.4 g, 17.4 mmol) following general method A for propargylamine synthesis to afford 2.2 g, (80%) of the alkyne **4{2}** as a reddish brown oil. <sup>1</sup>H NMR (CDCl<sub>3</sub>, 300 MHz) δ 7.29-7.24 (m, 2H), 7.19-7.14 (m, 3H), 3.34 (d, *J* = 2.4, 2H), 2.64 (t, *J* = 7.6, 2H), 2.44 (t, *J* = 7.2, 2H), 2.31 (s, 3H), 2.19 (t, *J* = 2.4, 1H), 1.84-1.74 (m, 2H). <sup>13</sup>C NMR (CDCl<sub>3</sub>, 75 MHz) δ 139.9, 126.2, 126.1, 123.5, 76.4, 70.7, 52.9, 43.3, 39.5, 31.3, 27.0.

**N-methyl-N-phenethylprop-2-yn-1-amine 4{3}.**

Propargyl bromide **10** (1.1 g, 8.88 mmol) was reacted with N-methyl-2-phenylethanamine **11c** (1.0 g, 7.40 mmol) following general method A for propargylamine synthesis to afford 0.96 g, (75%) of the alkyne **4{3}** as a reddish brown oil. <sup>1</sup>H NMR (CDCl<sub>3</sub>, 300 MHz) δ 7.28-7.14 (m,

5H), 3.37 (d,  $J = 2.4$ , 2H), 2.78-2.72 (m, 2H), 2.69-2.63 (m, 2H), 2.35 (s, 3H), 2.21 (t,  $J = 2.4$ , 1H).  $^{13}\text{C}$  NMR ( $\text{CDCl}_3$ , 75 MHz)  $\delta$  140.2, 128.7, 128.4, 126.1, 78.5, 73.3, 57.4, 45.6, 41.8, 34.3.

#### **4-(prop-2-ynyl)morpholine 4{4}.**

Compound 4{4} was prepared by following the method of Verron.<sup>11</sup> Propargyl bromide **10** (1.6 g, 13.8 mmol) was dissolved in THF (10 mL). To this reaction was added  $\text{K}_2\text{CO}_3$  (3.2 g, 23.0 mmol) followed by morpholine **11d** (1.0 g, 11.5 mmol). The reaction mixture was refluxed for 6 h. The reaction mixture was washed with  $\text{CH}_3\text{OH}$  (30 mL) and the washed concentrated to afford a white solid. The solid was suspended in  $\text{CH}_2\text{Cl}_2$  (30 mL) for 20 min then filtered, concentrated to provide the crude 4-prop-2-ynyl-morpholine. Kugelrohr distillation of the crude product afforded 1.2 g, (84%) of 4-prop-2-ynyl-morpholine 4{4} as a colorless oil that matched analytical data previously reported.<sup>11</sup>  $^1\text{H}$  NMR ( $\text{CDCl}_3$ , 300 MHz)  $\delta$  3.72 (t,  $J = 4.8$ , 4H), 3.27 (d,  $J = 2.4$ , 2H), 2.55 (t,  $J = 4.9$ , 4H), 2.26 (t,  $J = 2.4$ , 1H).  $^{13}\text{C}$  NMR ( $\text{CDCl}_3$ , 75 MHz)  $\delta$  78.4, 73.4, 66.8, 52.2, 47.2.

#### **4-phenyl-1-(prop-2-ynyl)piperidine 4{5}.**

Propargyl bromide **10** (1.0 g, 6.2 mmol) was reacted with 4-phenylpiperidine **11e** (0.89 g, 7.44 mmol) following general method A for propargylamine synthesis to afford 0.98 g, (80%) of the alkyne 4{5} as a white solid that matched analytical data previously reported.<sup>12</sup>  $^1\text{H}$  NMR ( $\text{CDCl}_3$ , 300 MHz)  $\delta$  7.36-7.19 (m, 5H), 3.38 (d,  $J = 2.8$ , 2H), 3.08-3.00 (m, 2H), 2.59-2.47 (m, 1H), 2.37 (dt,  $J = 3.5$ , 11.5, 2H), 2.29 (t,  $J = 3.5$ , 1H), 1.95-1.80 (m, 4H).  $^{13}\text{C}$  NMR ( $\text{CDCl}_3$ , 75 MHz)  $\delta$  145.8, 128.0, 126.5, 125.8, 78.7, 72.6, 52.6, 46.9, 41.8, 33.0. m.p 62-65 °C

#### **1-phenyl-4-(prop-2-ynyl)piperazine 4{6}.**

Propargyl bromide **10** (0.88 g, 7.4 mmol) was refluxed with 4-phenylpiperazine **11f** (1.0 g, 6.2 mmol) following general method A for propargylamine synthesis to afford 0.97 g (78%) of the

alkyne **4{6}** as a yellow solid that matched analytical data previously reported.<sup>13</sup> <sup>1</sup>H NMR (CDCl<sub>3</sub>, 300 MHz) δ 7.29-7.34 (m, 2H), 6.93 (d, *J* = 8.8, 2H), 6.86 (t, *J* = 7.3, 1H), 3.36 (d, *J* = 2.5, 2H), 3.24 (t, *J* = 5.0, 4H), 2.74 (t, *J* = 5.2, 4H), 2.27 (t, *J* = 2.4, 1H). <sup>13</sup>C NMR (CDCl<sub>3</sub>, 75 MHz) δ 150.9, 128.8, 119.4, 115.8, 78.3, 73.0, 51.6, 48.7, 46.6. m.p 45-47 °C.

**Ethyl 1-(prop-2-ynyl)piperidine-3-carboxylate 4{7}.**

Propargyl bromide **10** (0.91 g, 7.7 mmol) was reacted with ethyl nipecotate **11g** (1.0 g, 6.4 mmol) following general method A for propargylamine synthesis to afford 0.86 g (69%) of the alkyne **4{7}** as a yellow oil. <sup>1</sup>H NMR (CDCl<sub>3</sub>, 300 MHz) δ 4.13 (q, *J* = 7.1, 2H), 3.33 (d, *J* = 2.4, 2H), 3.01 (db, 1H), 2.81-2.74 (m, 1H), 2.64-2.24 (m, 1H), 2.78 (t, *J* = 10.7, 1H), 2.26-2.17 (m, 2H), 1.97-1.90 (m, 1H), 1.81-1.72 (m, 1H), 1.68-1.52 (m, 1H), 1.50-1.41 (m, 1H), 1.26 (t, *J* = 7.1, 3H). <sup>13</sup>C NMR (CDCl<sub>3</sub>, 75 MHz) δ 173.5, 78.3, 72.7, 59.9, 53.9, 51.8, 46.8, 41.4, 26.0, 24.0, 13.7.

**N-(cyclohexylmethyl)-N-methylprop-2-yn-1-amine 4{8}.**

N-methylpropargylamine **12** (1.0 g, 14.5 mmol) was reacted with (bromomethyl)cyclohexane **13a** (3.1 g, 17.4 mmol) following general method B for propargylamine synthesis to afford 1.74 g, (74%) of the alkyne **4{8}** as a reddish brown oil. <sup>1</sup>H NMR (CDCl<sub>3</sub>, 300 MHz) δ 2.97 (d, *J* = 3.0, 2H), 1.93 (s, 3H), 1.89-1.85 (m, 3H), 1.49 (m, 5H), 1.11-1.04 (m, 1H), 0.98-0.76 (m, 3H), 0.61-0.44 (m, 2H). <sup>13</sup>C NMR (CDCl<sub>3</sub>, 75 MHz) δ 78.7, 72.8, 62.5, 45.8, 42.0, 35.5, 31.6, 26.7, 26.0.

**N,3-dimethyl-N-(prop-2-ynyl)butan-1-amine 4{9}.**

N-methyl propargylamine **12** (1.0 g, 14.5 mmol) was reacted with 1-bromo-3-methylbutane **13b** following general method B for propargylamine synthesis to afford 1.54 g (77%) of the alkyne **4{9}** as a reddish brown oil. <sup>1</sup>H NMR (CDCl<sub>3</sub>, 300 MHz) δ 3.34 (d, *J* = 2.4, 2H), 2.42 (t, *J* = 7.6,

2H), 2.30 (s, 3H), 2.20 (t,  $J = 2.4$ , 1H), 1.68-1.53 (m, 1H), 1.39-1.30 (m, 2H), 0.91 (d,  $J = 6.6$ , 6H).  $^{13}\text{C}$  NMR ( $\text{CDCl}_3$ , 75 MHz)  $\delta$  77.8, 71.9, 53.0, 44.6, 40.9, 35.7, 25.4, 21.7.

### **General procedure for 1,4-disubstituted 1,2,3-triazole synthesis.**

To a solution of azide compound (1.0 equiv) in  $t\text{BuOH}/\text{H}_2\text{O}$  mixture (1:1, 0.2 M) at 25 °C was added propargylamine derived alkyne (1.1 equiv). To this reaction mixture was added  $\text{CuSO}_4 \cdot 5\text{H}_2\text{O}$  (1.0 M in  $\text{H}_2\text{O}$ , 1.0 equiv) followed by sodium ascorbate (1.0 M in  $\text{H}_2\text{O}$ , 2.0 equiv). The reaction mixture was stirred at room temperature for 24 h, then concentrated to a fourth its volume and diluted with  $\text{CH}_2\text{Cl}_2$  (2 mL). A mixture of  $\text{NH}_4\text{OH}/\text{H}_2\text{O}$  (1:1= 2 mL) was added and the mixture filtered through a biotage phase separator. The  $\text{CH}_2\text{Cl}_2$  filtrate was concentrated, charged onto silica plug and washed with 50% EtOAc in hexanes as forerun eluant. This was followed by 5%  $\text{CH}_3\text{OH}$  in  $\text{CH}_2\text{Cl}_2$  to afford the desired 1,4-disubstituted 1,2,3-triazole **2**.

### **2-hydroxy-3-(4-((methyl(3-phenylpropyl)amino)methyl)-1H-1,2,3-triazol-1-yl)propyl benzylcarbamate 2{4,2}.**

Azide **3{4}** (25 mg, 0.100 mmol) and the alkyne **4{2}** (19 mg, 0.100 mmol) were reacted following the general method for triazole synthesis to provide 41 mg (94%) of the 1,2,3-triazole **2{4,2}** as a thick oil.  $^1\text{H}$  NMR ( $\text{CDCl}_3$ , 300 MHz)  $\delta$  7.46 (s, 1H), 7.21-7.11 (m, 7H), 7.06-7.01 (m, 3H), 5.72 (t,  $J = 6.9$ , 1H), 4.5 (dd,  $J = 3, 13.4$ , 1H), 4.40-4.28 (m, 3H), 4.27-4.16 (m, 2H), 4.16-4.03 (m, 2H), 3.62 (s, 2H), 2.61 (t,  $J = 7.5$ , 2H), 2.42 (t,  $J = 7.5$ , 2H), 2.21 (s, 3H), 1.90-1.72 (m, 2H). HPLC (1% AcOH in  $\text{CH}_3\text{OH} : \text{H}_2\text{O}$ )  $R_T$  2.92 (97%), MS (APCI) : M+H expected 437.53, obtained 438.95.

### **2-(4-((4-phenylpiperazin-1-yl)methyl)-1H-1,2,3-triazol-1-yl)cyclohexanol 2{9,6}.**

Azide **3{9}** (15 mg, 0.106 mmol) and the alkyne **4{6}** (21 mg, 0.106 mmol) were reacted following the general method for triazole synthesis to provide 34 mg (95%) of the 1,2,3-triazole

**2{9,6}** as a thick oil. <sup>1</sup>H NMR (CDCl<sub>3</sub>, 300 MHz) δ 7.60 (s, 1H), 7.29-7.24 (m, 2H), 6.93-6.84 (m, 3H), 5.31 (s, 1H), 4.18-4.14 (m, 1H), 4.01-3.98 (m, 1H), 3.72 (s, 2H), 3.20 (t, *J* = 4.7, 4H), 2.70 (t, *J* = 5.0, 4H), 2.22-2.18 (m, 2H), 1.94-1.86 (m, 3H), 1.48-1.42 (m, 3H). HPLC (1% AcOH in CH<sub>3</sub>OH : H<sub>2</sub>O) R<sub>T</sub> 2.51 (84%), MS (APCI) : M+H expected 341.45, obtained 341.90.

**Ethyl 1-((1-(2-hydroxyhexyl)-1*H*-1,2,3-triazol-4-yl)methyl)piperidine-3-carboxylate 2{7,7}**.

Azide **3{7}** (15 mg, 0.105 mmol) and the alkyne **4{7}** (20 mg, 0.106 mmol) were reacted following the general method for triazole synthesis to provide 32 mg (91%) of the 1,2,3-triazole **2{7,7}** as a thick oil. <sup>1</sup>H NMR (CDCl<sub>3</sub>, 300 MHz) δ 7.68 (s, 1H), 4.48-4.41 (dt, *J* = 3.1, 13.8, 1H), 4.27-4.02 (m, 5H), 3.76 (d, *J* = 14.2, 1H), 3.70 (d, *J* = 14.2, 1H), 3.03 (d, *J* = 10.9, 1H), 2.86 (d, *J* = 10.4, 1H), 2.62-2.57 (m, 1H), 2.32 (t, *J* = 10.7, 1H), 2.18 (t, *J* = 10.7, 1H), 1.98-1.91 (m, 1H), 1.72-1.69 (m, 1H), 1.68-1.58 (m, 1H), 1.50-1.43 (m, 4H), 1.42-1.37 (m, 3H), 1.23 (t, *J* = 7.2, 3H), 0.90 (t, *J* = 6.9, 3H). HPLC (CH<sub>3</sub>OH : H<sub>2</sub>O) R<sub>T</sub> 14.25 (99%), gradient elution 55% to 95% CH<sub>3</sub>OH over 26 min. MS (APCI) : M+H expected 338.45, obtained 339.30.

**1-(4-((cyclohexylmethyl)(methylamino)methyl)-1*H*-1,2,3-triazol-1-yl)hexan-2-ol 2{7,8}**.

Azide **3{7}** (15 mg, 0.105 mmol) and the alkyne **4{8}** (17 mg, 0.105 mmol) were reacted following the general method for triazole synthesis to provide 30 mg (93%) of the 1,2,3-triazole **2{7,8}** as a thick oil. <sup>1</sup>H NMR (CDCl<sub>3</sub>, 300 MHz) δ 7.47 (s, 1H), 4.24-4.17 (m, 1H), 4.01 (dd, *J* = 7.8, 13.8, 1H), 3.89-3.74 (m, 1H), 3.52 (s, 2H), 2.11-2.05 (bs, 5H), 1.73 (s, 1H), 1.55-1.43 (m, 5H), 3.00-2.00 (m, 3H), 1.13-1.08 (m, 3H), 1.03-0.88 (m, 3H), 0.69-0.62 (m, 5H). HPLC (CH<sub>3</sub>OH : H<sub>2</sub>O) R<sub>T</sub> 16.53 (95%), gradient elution 55% to 95% CH<sub>3</sub>OH over 26 min. MS (APCI) : M+H expected 308.26, obtained 309.25.

**1-(4-((4-phenylpiperazin-1-yl)methyl)-1*H*-1,2,3-triazol-1-yl)hexan-2-ol 2{7,6}.**

Azide **3{7}** (15 mg, 0.105 mmol) and the alkyne **4{6}** (21 mg, 0.105 mmol) were reacted following the general method for triazole synthesis to provide 35 mg (96%) of the 1,2,3-triazole **2{7,6}** as a thick oil. <sup>1</sup>H NMR (CDCl<sub>3</sub>, 300 MHz) δ 7.70 (s, 1H), 7.29-7.24 (m, 2H), 6.93-6.84 (m, 3H), 4.46 (dd, *J* = 2.5, 14.0, 1H), 4.24 (dd, *J* = 8, 14, 1H), 4.10-4.00 (m, 1H), 3.76 (s, 2H), 3.42 (s, 2H), 3.23-3.17 (bs, 4H), 2.67-1.80 (bs, 4H), 1.53-1.28 (m, 6H), 0.92 (t, *J* = 7, 3H). HPLC (CH<sub>3</sub>OH : H<sub>2</sub>O) R<sub>T</sub> 9.79 (84%). MS (APCI) : M+H expected 343.47, obtained 344.90.

**Ethyl 1-((1-(2-hydroxycyclohexyl)-1*H*-1,2,3-triazol-4-yl)methyl)piperidine-3-carboxylate 2{9,7}.**

Azide **3{9}** (15 mg, 0.106 mmol) and the alkyne **4{7}** (21 mg, 0.106 mmol) were reacted following the general method for triazole synthesis to provide 33 mg (92%) of the 1,2,3-triazole **2{9,7}** as a thick oil. <sup>1</sup>H NMR (CDCl<sub>3</sub>, 300 MHz) δ 7.60 (s, 1H), 4.20-4.07 (m, 3H), 3.99-3.91 (m, 1H), 3.79 (s, 1H), 3.69-3.66 (m, 2H), 3.01 (d, *J* = 10.8, 1H), 2.82 (d, *J* = 11.0, 1H), 2.63-2.54 (m, 1H), 2.34-2.25 (m, 1H), 2.23-2.07 (m, 3H), 1.94-1.80 (m, 4H), 1.75-1.68 (m, 1H), 1.66-1.53 (m, 1H), 1.51-1.34 (m, 4H), 1.23 (t, *J* = 7.0, 3H). HPLC (CH<sub>3</sub>OH : H<sub>2</sub>O) R<sub>T</sub> 12.84 (98%). MS (APCI) : M+H expected 336.43, obtained 337.90.

**2-(4-((cyclohexylmethyl)(methyl)amino)methyl)-1*H*-1,2,3-triazol-1-yl)cyclohexanol 2{9,8}.**

Azide **3{9}** (15 mg, 0.106 mmol) and the alkyne **4{8}** (18 mg, 0.106 mmol) were reacted following the general method for triazole synthesis to provide 30 mg (92%) of the 1,2,3-triazole **2{9,8}** as a thick oil. <sup>1</sup>H NMR (CDCl<sub>3</sub>, 300 MHz) δ 7.61 (s, 1H), 4.25-4.10 (m, 3H), 4.02-3.90 (m, 1H), 3.69 (s, 2H), 2.26 (s, 3H), 2.22-2.15 (m, 4H), 1.95-1.82 (m, 3H), 1.80-1.60 (m, 5H), 1.53-1.35 (m, 4H), 1.30-1.10 (m, 3H), 0.92-0.76 (m, 2H). HPLC (CH<sub>3</sub>OH : H<sub>2</sub>O) R<sub>T</sub> 18.94

(81%), gradient elution 55% to 95% CH<sub>3</sub>OH over 26 min. MS (APCI) : M+H expected 306.24, obtained 307.90.

**Ethyl 1-((1-(3-(benzyloxy)-2-hydroxypropyl)-1*H*-1,2,3-triazol-4-yl)methyl)piperidine-3-carboxylate 2{8,7}**.

Azide **3{8}** (15 mg, 0.072 mmol) and the alkyne **4{7}** (14 mg, 0.072 mmol) were reacted following the general method for triazole synthesis to provide 26 mg (91%) of the 1,2,3-triazole **2{8,7}** as a thick oil. <sup>1</sup>H NMR (CDCl<sub>3</sub>, 300 MHz) δ 7.56 (s, 1H), 7.32-7.22 (m, 5H), 4.49-4.47 (m, 3H), 4.37-4.29 (m, 1H), 4.20-4.10 (m, 1H), 4.08-4.05 (q, *J* = 4.5, 2H), 3.70-3.60 (s, 2H), 3.48-3.30 (m, 3H), 2.95 (d, *J* = 9.6, 1H), 2.75 (d, *J* = 9.6, 1H), 2.54 (t, *J* = 10.4, 1H), 2.27-2.21 (m, 1H), 2.18-2.03 (m, 2H), 1.86 (d, *J* = 11.1, 1H), 1.69-1.37 (m, 3H), 1.16 (t, *J* = 7.1, 4H). HPLC (CH<sub>3</sub>OH : H<sub>2</sub>O) R<sub>T</sub> 14.56 (98%), gradient elution 55% to 95% CH<sub>3</sub>OH over 26 min. MS (APCI) : M+H expected 402.49, obtained 403.25.

**3-(4-((dibutylamino)methyl)-1*H*-1,2,3-triazol-1-yl)-2-hydroxypropyl benzylcarbamate 2{4,1}**.

Azide **3{4}** (20 mg, 0.080 mmol) and the alkyne **4{1}** (13 mg, 0.080 mmol) were reacted following the general method for triazole synthesis to provide 31 mg (92%) of the 1,2,3-triazole **2{4,1}** as a thick oil. <sup>1</sup>H NMR (CDCl<sub>3</sub>, 300 MHz) δ 7.59 (s, 1H), 7.35-7.28 (m, 5H), 5.56 (t, *J* = 5.6, 1H), 4.41 (dd, *J* = 3.3, 13.6, 1H), 4.40-4.30 (m, 3H), 4.28-4.10 (m, 4H), 3.72 (s, 2H), 2.41 (t, *J* = 7.2, 4H), 1.48-1.43 (m, 4H), 1.41-1.27 (m, 4H), 0.90 (t, *J* = 7.2, 6H). HPLC (CH<sub>3</sub>OH : H<sub>2</sub>O) R<sub>T</sub> 16.53 (95%). MS (APCI) : M+H expected 417.55, obtained 418.35.

**Ethyl 1-((1-(3-(benzylcarbamoyloxy)-2-hydroxypropyl)-1*H*-1,2,3-triazol-4-yl)methyl)piperidine-3-carboxylate 2{4,7}**.

Azide **3{4}** (20 mg, 0.080 mmol) and the alkyne **4{7}** (16 mg, 0.080 mmol) were reacted following the general method for triazole synthesis to provide 34 mg (96%) of the 1,2,3-triazole **2{4,7}** as a thick oil. <sup>1</sup>H NMR (CDCl<sub>3</sub>, 300 MHz) δ 7.66 (s, 1H), 7.33-7.27 (m, 5H), 5.79 (t, *J* = 5.4, 1H), 4.50 (dt, *J* = 2.8, 13.7, 1H), 4.40-4.30 (m, 3H), 4.28-4.18 (m, 2H), 4.16-4.06 (m, 4H), 3.64 (d, *J* = 14.2, 1H), 3.60 (d, *J* = 14.2, 1H), 2.95 (d, *J* = 10.8, 1H), 2.75 (d, *J* = 11.1, 1H), 2.59-2.50 (m, 1H), 2.25 (t, *J* = 10.2, 1H), 2.09 (t, *J* = 10.2, 1H), 1.92-1.87 (m, 1H), 1.73-1.67 (m, 1H), 1.51-1.37 (m, 2H), 1.23 (t, *J* = 7.2, 3H). HPLC (CH<sub>3</sub>OH : H<sub>2</sub>O) R<sub>T</sub> 13.88 (97%), gradient elution 55% to 95% CH<sub>3</sub>OH over 26 min. MS (APCI) : M+H expected 445.51, obtained 446.25.

**2-Hydroxy-3-(4-((isopentyl(methyl)amino)methyl)-1*H*-1,2,3-triazol-1-yl)propyl benzylcarbamate 2{4,9}**.

Azide **3{4}** (20 mg, 0.080 mmol) and the alkyne **4{9}** (11 mg, 0.080 mmol) were reacted following the general method for triazole synthesis to provide 29 mg (92%) of the 1,2,3-triazole **2{4,9}** as a thick oil. <sup>1</sup>H NMR (CDCl<sub>3</sub>, 300 MHz) δ 7.81 (s, 1H), 7.35-7.28 (m, 6H), 5.50 (t, *J* = 5.4, 1H), 4.54 (dd, *J* = 3.0, 13.6, 1H), 4.40-4.36 (m, 3H), 4.30-4.24 (m, 1H), 4.20 (d, *J* = 4.1, 1H), 4.12 (dd, *J* = 5.2, 11.6, 1H), 3.79 (s, 2H), 2.57-2.51 (m, 2H), 2.32 (s, 3H), 1.65-1.55 (m, 1H), 1.51-1.43 (m, 2H), 0.91 (t, *J* = 6.6, 6H). HPLC (CH<sub>3</sub>OH : H<sub>2</sub>O) R<sub>T</sub> 3.25 (82%), gradient elution 55% to 95% CH<sub>3</sub>OH over 26 min. MS (APCI) : M+H expected 389.49, obtained 390.30.

**3-(4-(((cyclohexylmethyl)(methyl) amino)methyl)-1*H*-1,2,3-triazol-1-yl)-2-hydroxypropyl benzylcarbamate 2{4,8}**.

Azide **3{4}** (20 mg, 0.080 mmol) and the alkyne **4{8}** (13 mg, 0.080 mmol) were reacted following the general method for triazole synthesis to provide 30 mg (90%) of the 1,2,3-triazole **2{4,8}** as a thick oil. <sup>1</sup>H NMR (CDCl<sub>3</sub>, 300 MHz) δ 7.51 (s, 1H), 7.26-7.19 (m, 5H), 5.39 (t, *J* = 5.4, 1H), 4.43 (dd, *J* = 3.3, 13.7, 1H), 4.34 (m, 3H), 4.18-4.13 (m, 1H), 4.11 (d, *J* = 3.7, 1H),



4.07 (dd,  $J = 4.0, 13.3$ , 1H), 3.53 (s, 2H), 2.11 (s, 3H), 2.07 (d,  $J = 7.2$ , 2H), 1.70-1.59 (m, 5H), 1.46-1.36 (m, 1H), 1.18-1.09 (m, 4H), 0.79-0.68 (m, 2H). HPLC (CH<sub>3</sub>OH : H<sub>2</sub>O) R<sub>T</sub> 11.89 (84%). MS (APCI) : M+H expected 415.53, obtained 416.95.

**2-(4-((4-phenylpiperidin-1-yl)methyl)-1H-1,2,3-triazol-1-yl)cyclohexyl benzoate 2{10,5}**.

Azide **3{10}** (20 mg, 0.082 mmol) and the alkyne **4{5}** (16 mg, 0.082 mmol) were reacted following the general method for triazole synthesis to provide 33 mg (90%) of the 1,2,3-triazole **2{10,5}** as a thick oil. <sup>1</sup>H NMR (CDCl<sub>3</sub>, 300 MHz) δ 7.88-7.85 (m, 2H), 7.49 (tt,  $J = 0.9, 7.5$ , 1H), 7.39-7.27 (m, 4H), 7.23-7.15 (m, 3H), 7.58 (s, 1H), 5.38-5.29 (m, 1H), 4.79-4.70 (m, 1H), 3.68 (s, 2H), 2.89-2.84 (m, 2H), 2.39-2.23 (m, 3H), 2.09-1.94 (m, 5H), 1.72-1.51 (m, 7H). HPLC (CH<sub>3</sub>OH : H<sub>2</sub>O) R<sub>T</sub> 2.52 (100%). MS (APCI) : M+H expected 444.25, obtained 445.30.

**2-(4-(((cyclohexylmethyl)(methyl)amino)methyl)-1H-1,2,3-triazol-1-yl)cyclohexyl 2-phenoxyacetate 2{12,8}**.

Azide **3{12}** (20 mg, 0.073 mmol) and the alkyne **4{8}** (12 mg, 0.073 mmol) were reacted following the general method for triazole synthesis to provide 30 mg (93%) of the 1,2,3-triazole **2{12,8}** as a thick oil. <sup>1</sup>H NMR (CDCl<sub>3</sub>, 300 MHz) δ 7.46 (s, 1H), 7.29-7.23 (m, 2H), 6.97 (tt,  $J = 0.9, 7.4$ , 1H), 6.75-6.71 (m, 2H), 5.27-5.18 (m, 1H), 4.60-4.51 (m, 1H), 4.48 (d,  $J = 16.3$ , 1H), 4.39 (d,  $J = 16.3$ , 1H), 3.63 (m, 2H), 2.29-2.21 (m, 2H), 2.16 (s, 3H), 2.12 (d,  $J = 7.1$ , 2H), 2.00-1.91 (m, 3H), 1.79-1.60 (m, 5H), 1.59-1.40 (m, 4H), 1.29-1.11 (m, 3H), 0.89-0.74 (m, 2H). HPLC (CH<sub>3</sub>OH : H<sub>2</sub>O) R<sub>T</sub> 13.92 (84%), gradient elution 55% to 95% CH<sub>3</sub>OH over 26 min. MS (APCI) : M+H expected 440.28, obtained 441.90.

**2-(4-((methyl(3-phenylpropyl)amino)methyl)-1H-1,2,3-triazol-1-yl)cyclohexyl 2-phenoxyacetate 2{12,2}**.

Azide **3{12}** (20 mg, 0.073 mmol) and the alkyne **4{2}** (14 mg, 0.073 mmol) were reacted following the general method for triazole synthesis to provide 32 mg (95%) of the 1,2,3-triazole

**2{12,2}** as a thick oil. <sup>1</sup>H NMR (CDCl<sub>3</sub>, 300 MHz) δ 7.44 (s, 1H), 7.28-7.17 (m, 7H), 6.97 (t, *J* = 7.2, 1H), 6.73 (d, *J* = 8.1, 2H), 5.28-5.17 (m, 1H), 4.52-4.42 (m, 4H), 3.68 (s, 2H), 2.62 (t, *J* = 7.8, 2H), 2.41 (t, *J* = 7.2, 2H), 2.21 (s, 3H), 1.94-1.83 (m, 7H), 1.53-1.47 (m, 4H). HPLC (CH<sub>3</sub>OH : H<sub>2</sub>O) R<sub>T</sub> 20.29 (97%), gradient elution 55% to 95% CH<sub>3</sub>OH over 26 min. MS (APCI) : M+H expected 462.58, obtained 463.00.

**2-(4-((4-phenylpiperidin-1-yl)methyl)-1*H*-1,2,3-triazol-1-yl)cyclohexyl 2-phenoxyacetate 2{12,5}**.

Azide **3{12}** (20 mg, 0.073 mmol) and the alkyne **4{5}** (15 mg, 0.073 mmol) were reacted following the general method for triazole synthesis to provide 32 mg (91%) of the 1,2,3-triazole **2{12,5}** as a thick oil. <sup>1</sup>H NMR (CDCl<sub>3</sub>, 300 MHz) δ 7.53 (s, 1H), 7.32-7.17 (m, 7H), 6.97 (tt, *J* = 0.9, 7.5, 1H), 6.76-6.72 (m, 2H), 5.29-5.20 (m, 1H), 4.62-4.53 (m, 1H), 4.49 (d, *J* = 16.3, 1H), 4.40 (d, *J* = 16.3, 1H), 3.70 (s, 2H), 3.04-2.99 (m, 2H), 2.49-2.41 (m, 1H), 2.32-2.22 (m, 2H), 2.19-2.09 (m, 2H), 2.03-1.09 (m, 3H), 1.82-1.76 (m, 4H), 1.60-1.48 (m, 3H). HPLC (CH<sub>3</sub>OH : H<sub>2</sub>O) R<sub>T</sub> 14.48 (98%). MS (APCI) : M+H expected 474.59, obtained 475.85.

**2-(4-((dibutylamino)methyl)-1*H*-1,2,3-triazol-1-yl)cyclohexyl 2-phenoxyacetate 2{12,1}**.

Azide **3{12}** (20 mg, 0.073 mmol) and the alkyne **4{1}** (12 mg, 0.073 mmol) were reacted following the general method for triazole synthesis to provide 30 mg (91%) of the 1,2,3-triazole **2{12,1}** as a thick oil. <sup>1</sup>H NMR (CDCl<sub>3</sub>, 300 MHz) δ 7.46 (s, 1H), 7.26-7.21 (m, 2H), 6.98-6.90 (m, 1H), 6.72 (d, *J* = 8.3, 2H), 5.24-5.16 (m, 1H), 4.67-4.49 (m, 1H), 4.45 (d, *J* = 16.2, 1H), 4.36 (d, *J* = 16.2, 1H), 3.72 (s, 2H), 2.38 (t, *J* = 7.2, 4H), 2.25-2.21 (m, 2H), 1.98-1.89 (m, 3H), 1.51-1.38 (m, 7H), 1.31-1.19 (m, 5H), 0.86 (t, *J* = 7.2, 6H). HPLC (CH<sub>3</sub>OH : H<sub>2</sub>O) R<sub>T</sub> 20.38 (81%), gradient elution 55% to 95% CH<sub>3</sub>OH over 26 min. MS (APCI) : M+H expected 442.59, obtained 444.30.

**Ethyl 1-((1-(2-(2-phenoxyacetoxy)cyclohexyl)-1*H*-1,2,3-triazol-4-yl)methyl)piperidine-3-carboxylate 2{12,7}**.

Azide **3{12}** (20 mg, 0.073 mmol) and the alkyne **4{7}** (14 mg, 0.073 mmol) were reacted following the general method for triazole synthesis to provide 31 mg (92%) of the 1,2,3-triazole **2{12,7}** as a thick oil. <sup>1</sup>H NMR (CDCl<sub>3</sub>, 300 MHz) δ 7.49 (d, *J* = 6, 1H), 7.29-7.23 (m, 2H), 6.98 (tt, *J* = 0.9, 6.4, 1H), 6.73 (dd, *J* = 0.8, 7.9, 2H), 5.23 (m, 1H), 4.58-4.53 (m, 1H), 4.48 (d, *J* = 16.3, 1H), 4.39 (d, *J* = 16.3, 1H), 4.16-4.06 (m, 2H), 3.70 (d, *J* = 14.2, 1H), 3.63 (d, *J* = 14.2, 1H), 2.95 (t, *J* = 8.1, 1H), 2.76-2.70 (m, 1H), 2.58-2.50 (m, 1H), 2.30-2.22 (m, 3H), 2.19-1.81 (m, 6H), 1.71-1.65 (m, 1H), 1.60-1.37 (m, 5H), 1.23 (t, *J* = 7.2, 3H). HPLC (CH<sub>3</sub>OH : H<sub>2</sub>O) R<sub>T</sub> 15.25 (96%), gradient elution 55% to 95% CH<sub>3</sub>OH over 26 min. MS (APCI) : M+H expected 470.56, obtained 470.80

**2-(4-((dibutylamino)methyl)-1*H*-1,2,3-triazol-1-yl)cyclohexyl 2-phenylacetate 2{11,1}**.

Azide **3{11}** (25 mg, 0.096 mmol) and the alkyne **4{1}** (16 mg, 0.096 mmol) were reacted following the general method for triazole synthesis to provide 38 mg (93%) of the 1,2,3-triazole **2{11,1}** as a thick oil. <sup>1</sup>H NMR (CDCl<sub>3</sub>, 300 MHz) δ 7.10 (s, 1H), 7.07-6.99 (m, 3H), 6.86-6.82 (m, 2H), 4.92-4.83 (m, 1H), 4.35-4.24 (m, 1H), 3.47 (s, 2H), 3.20 (s, 2H), 2.14 (t, *J* = 7.2, 3H), 2.10-1.92 (m, 2H), 1.72-1.64 (m, 3H), 1.29-1.16 (m, 7H), 1.11-0.99 (m, 5H), 0.69 (t, *J* = 7.2, 6H). HPLC (CH<sub>3</sub>OH : H<sub>2</sub>O) R<sub>T</sub> 16.80 (86%), gradient elution 55% to 95% CH<sub>3</sub>OH over 26 min. MS (APCI) : M+H expected 426.59, obtained 430.00.

**2-(4-(((cyclohexylmethyl)(methyl)amino)methyl)-1*H*-1,2,3-triazol-1-yl)cyclohexyl 2-phenylacetate 2{11,8}**.

Azide **3{11}** (25 mg, 0.096 mmol) and the alkyne **4{8}** (16 mg, 0.096 mmol) were reacted following the general method for triazole synthesis to provide 38 mg (93%) of the 1,2,3-triazole **2{11,8}** as a thick oil. <sup>1</sup>H NMR (CDCl<sub>3</sub>, 300 MHz) δ 7.56 (s, 1H), 7.09-7.00 (m, 3H), 6.90-6.84 (m, 2H), 4.93-4.84 (m, 1H), 4.36-4.27 (m, 1H), 3.39 (s, 2H), 3.22 (s, 2H), 2.10-1.90 (m, 7H),

1.79-1.65 (m, 3H), 1.64-1.40 (m, 6H), 1.33-1.21 (m, 4H), 1.10-0.90 (m, 4H), 0.68-0.54 (m, 2H).

HPLC (CH<sub>3</sub>OH : H<sub>2</sub>O) R<sub>T</sub> 16.53 (95%). MS (APCI) : M+H expected 424.58, obtained 423.40.

**2-hydroxy-3-(4-((4-phenylpiperidin-1-yl)methyl)-1H-1,2,3-triazol-1-yl)propyl benzylcarbamate 2{4,5}.**

Azide 3{4} (20 mg, 0.080 mmol) and the alkyne 4{5} (16 mg, 0.080 mmol) were reacted following the general method for triazole synthesis to provide 33 mg (92%) of the 1,2,3-triazole 2{4,5} as a thick oil. <sup>1</sup>H NMR (CDCl<sub>3</sub>, 300 MHz) δ 7.69 (s, 1H), 7.33-7.24 (m, 7H), 7.22-7.19 (m, 3H), 5.71 (t, *J* = 6.8, 1H), 4.53 (dd, *J* = 3.0, 13.6, 1H), 4.39-4.21 (m, 5H), 4.20-4.10 (m, 2H), 3.03 (d, *J* = 11.4, 2H), 2.53-2.43 (m, 1H), 2.20-2.10 (m, 2H), 1.83-1.72 (m, 4H). HPLC (CH<sub>3</sub>OH : H<sub>2</sub>O) R<sub>T</sub> 2.33 (100%). MS (APCI) : M+H expected 449.55, obtained 450.35.

**Reference:**

1. Gajewiak, J.; Prestwich, G. D.; *Tetrahedron Lett.* **2006**, *47*, 7607-7609.
2. Liu, G.; Liu, C-P.; Sun, L.; Wen, Q-W.; Xue, J-T.; Li, M-Q. *Shandong Huagong* **2008**, *37*, 1-3.
3. Macchia, B.; balsamo, A.; lapucci, A.; Macchia, F.; Martinelli, A.; Ammon, H.; Prasad, S.; Breschi, M. C.; Ducci, M.; Martinotti, E. *J. Med. Chem.* **1987**, *30*, 616-622.
4. Rousseau, J.; Rousseau, C.; Lynikaite, B.; Sackus, A.; de Leon, C.; Rollin, P.; Tatibouet, A. *Tetrahedron* **2009**, *65*, 8571-8581.
5. Konno, H.; Toshiro, E.; Hinoda, N. *Synthesis* **2003**, *14*, 2161-2164.
6. Schrittwieser, J. H.; Lavandera, L.; Seisser, B.; Mautner, B.; Kroutil, W. *Eur. J. Org. Chem.* **2009**, *14*, 2293-2298.
7. Kiasat, A. R.; Badri, R.; Zargari, B.; Sayyuh, S. *J. Org. Chem.* **2008**, *73*, 8382-8385.
8. Zhao, P.; Yang, Z-J.; Zhang, L-R.; Zhang, L-H. *Tetrahedron, Lett.* **2008**, *49*, 2951-2955.
9. Lattanzi, A.; Della Sala, G. *Eur. J. Org. Chem.* **2009**, *12*, 1845-1848.
10. Demizu, Y.; Matsumoto, K.; Onomura, O.; Matsumura, Y. *Tetrahedron Lett.* **2009**, *48*, 7605-7609.
11. Preiss, T.; Henkelman, J.; Wulff-Doering, J.; Joachim, S. S. *Ger. Offen.* **1998** (DE 19636078).
12. Verron, J.; Malherbe, P.; Prinssen, E.; Thomas, A. W.; Nock, N.; Masciadri, R. *Tetrahedron Lett.* **2006**, *48*, 377-380.

13. Cantet, A-C.; Carreyre, H.; Gesson, J-P.; Jouannetaud, M-P.; Renoux, B. *J. Org. Chem.* **2008**, *73*, 2875-2878.
14. Torregrosa, J. L.; Baboulene, M.; Speziale, V.; lattes, A. *J. Organometallic Chem.* **1983**, *244*, 311-317.

## Glycidyl esters 6a-c

### Oxiran-2-ylmethyl octanoate (6a). <sup>1</sup>H NMR

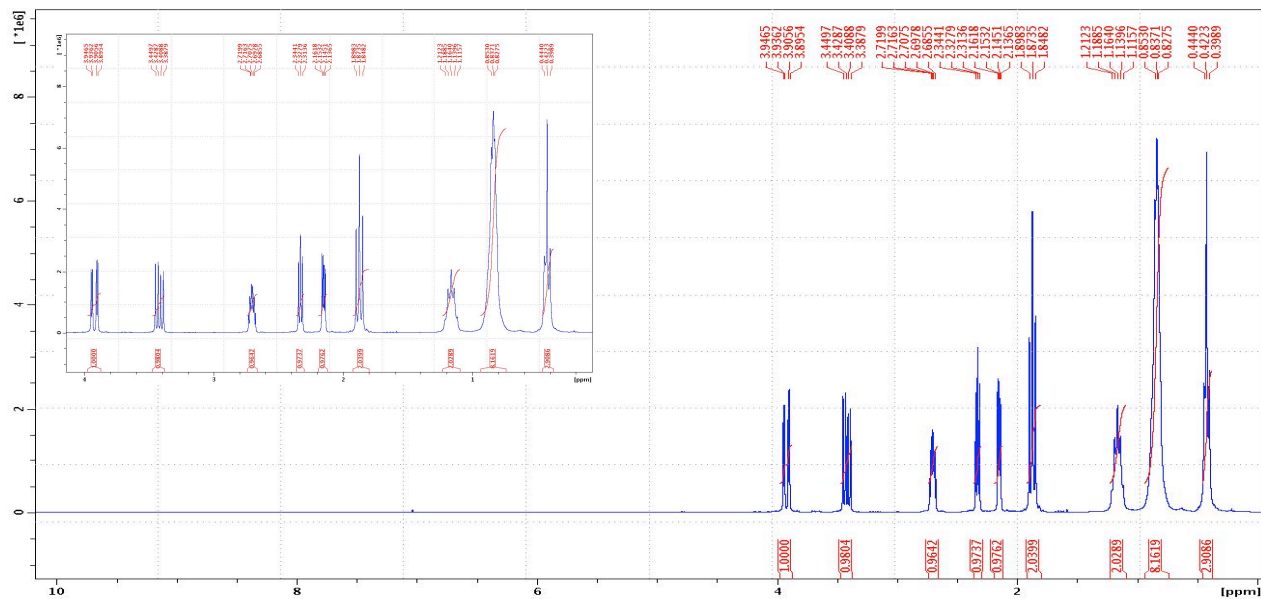

### Oxiran-2-ylmethyl benzoate (6b). <sup>1</sup>H NMR

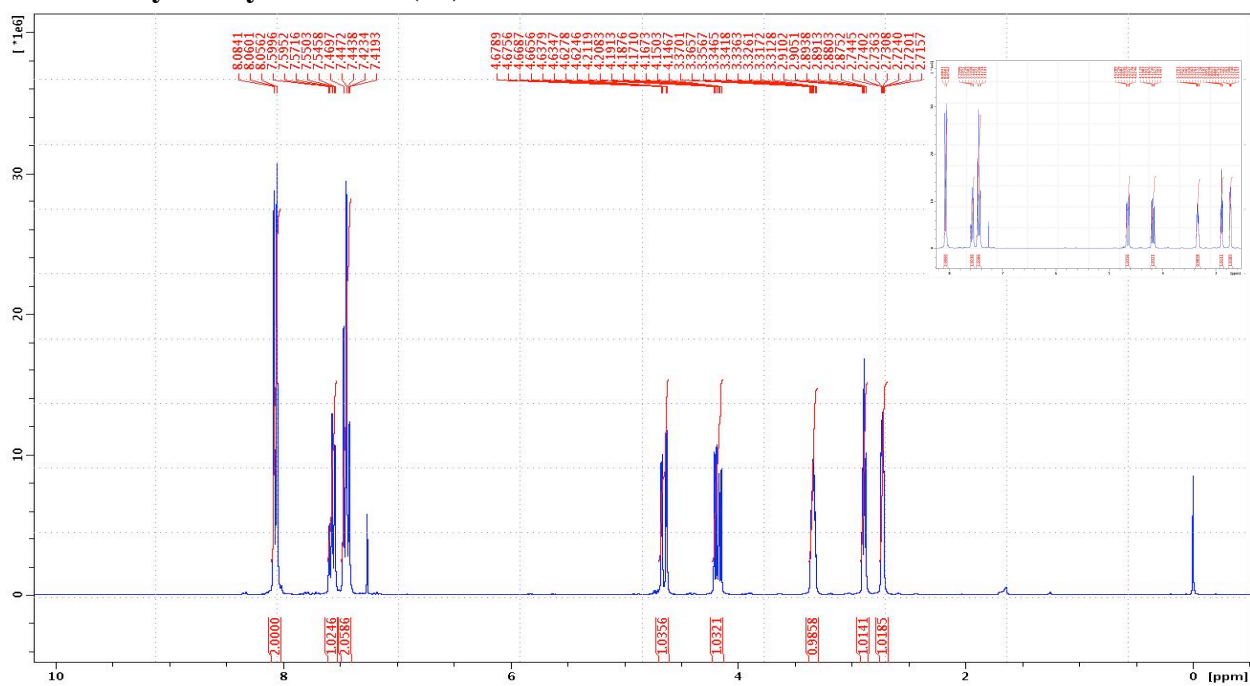

### Oxiran-2-ylmethyl benzoate (6b). $^{13}\text{C}$ NMR

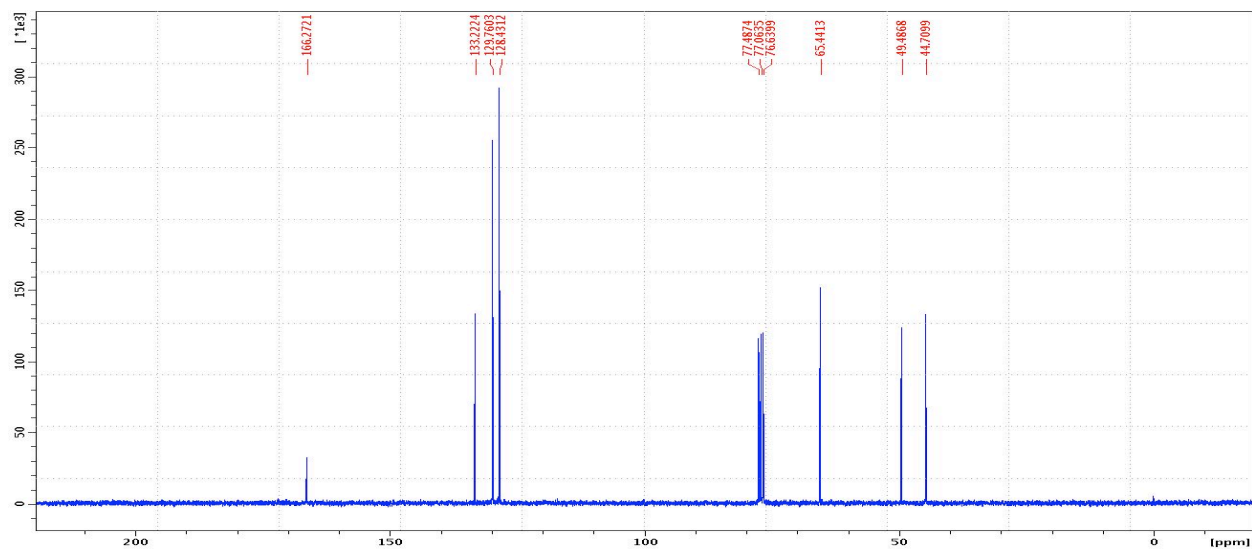

### Oxiran-2-ylmethyl cyclohexanecarboxylate (6c). $^1\text{H}$ NMR

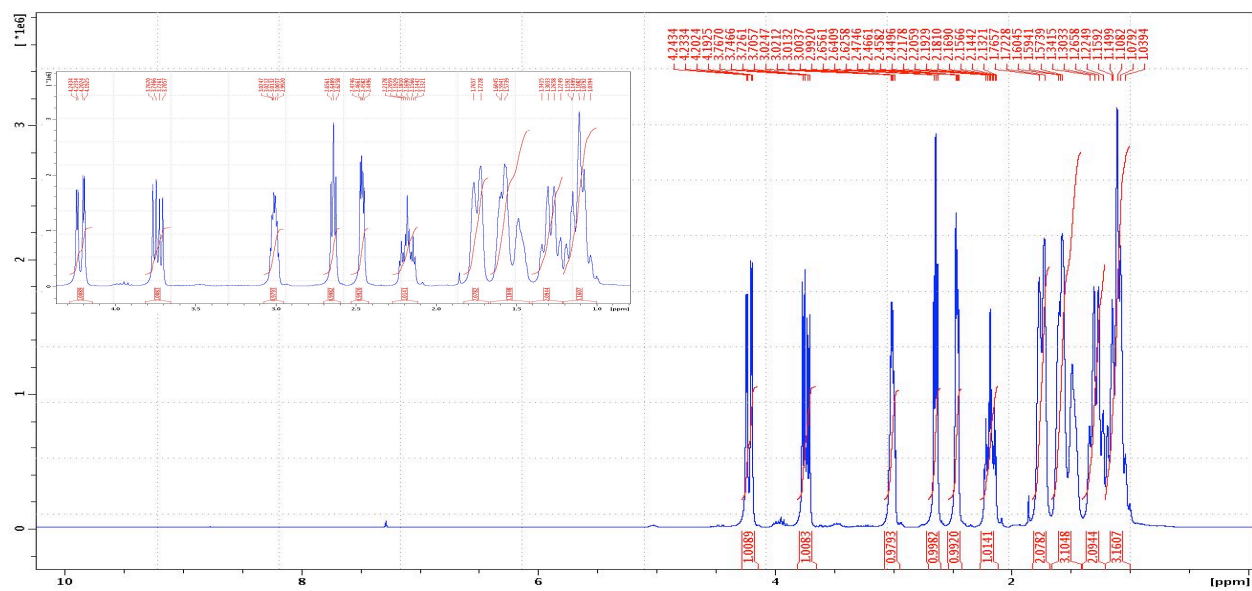

### Oxiran-2-ylmethyl cyclohexanecarboxylate (6c). <sup>13</sup>C NMR

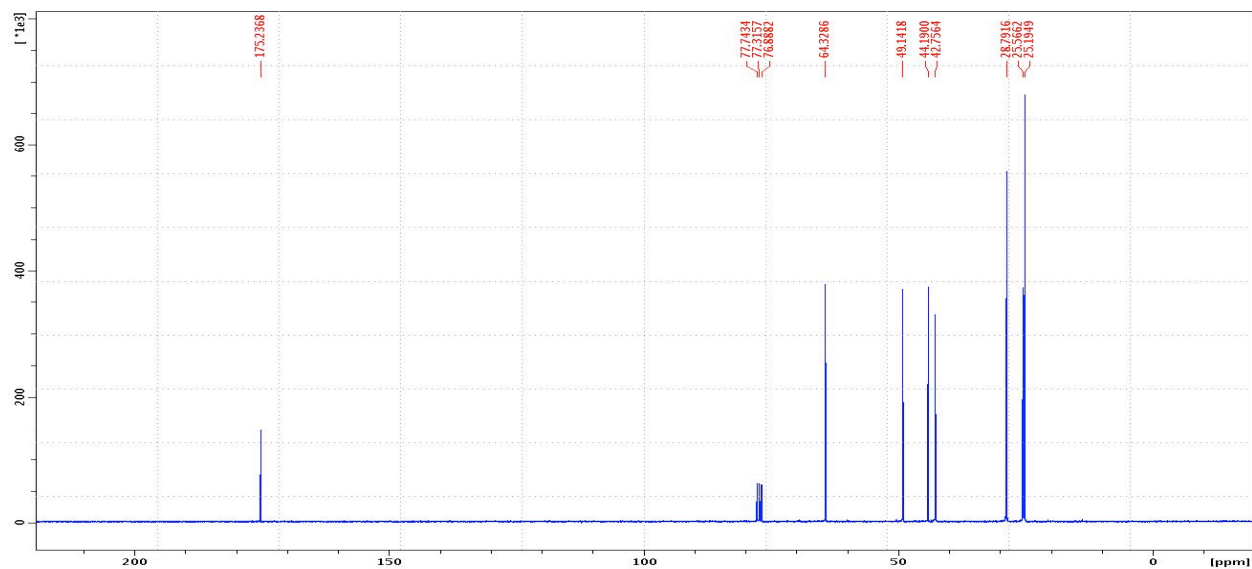

### Glycidyl carbamates 8a-b

### Oxiran-2-ylmethyl benzylcarbamate (8a). <sup>1</sup>H NMR

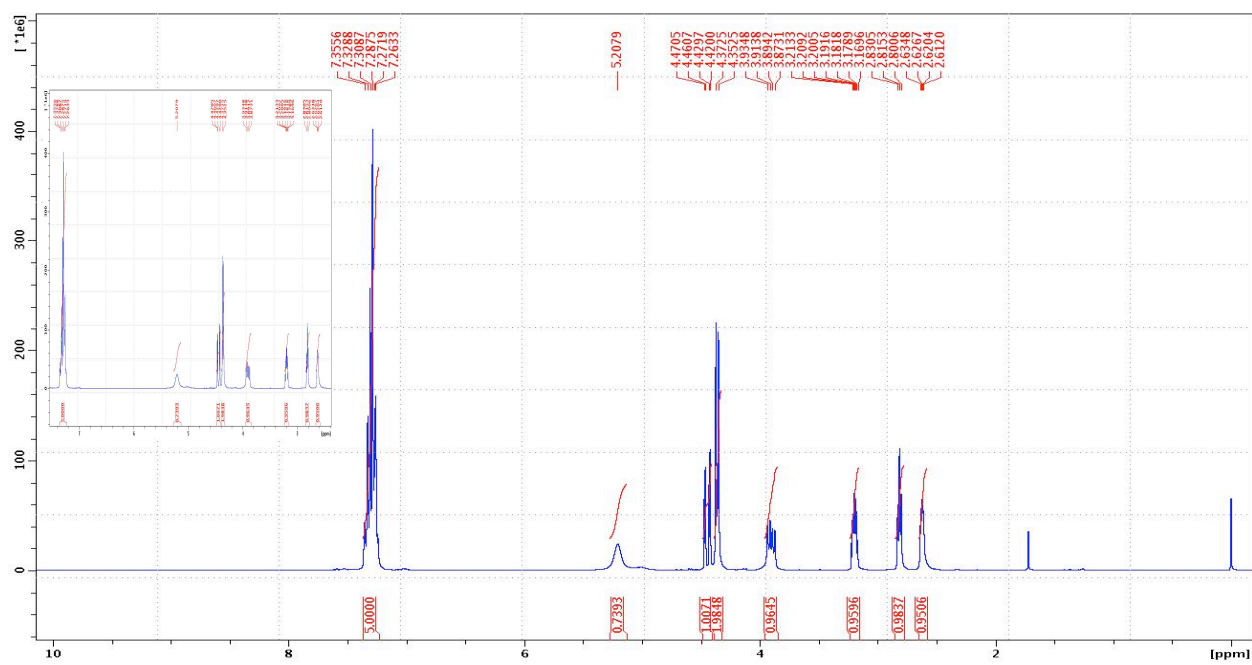



### Oxiran-2-ylmethyl benzylcarbamate (8a). <sup>13</sup>C NMR

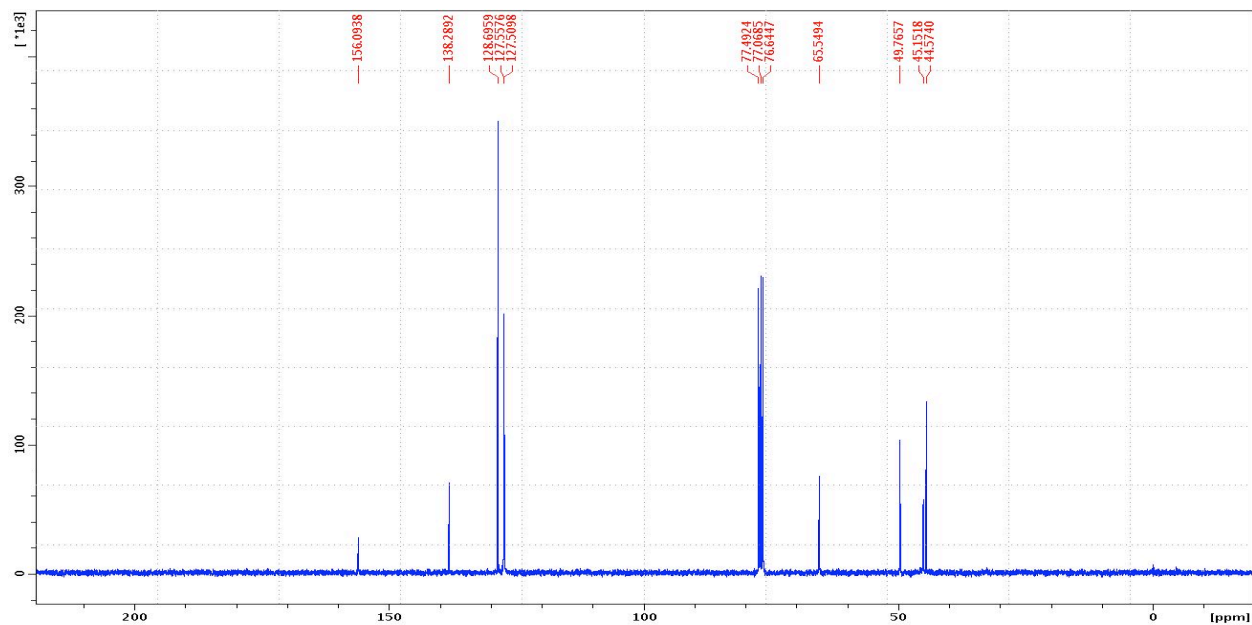

### Oxiran-2-ylmethyl butylcarbamate (8b). <sup>1</sup>H NMR

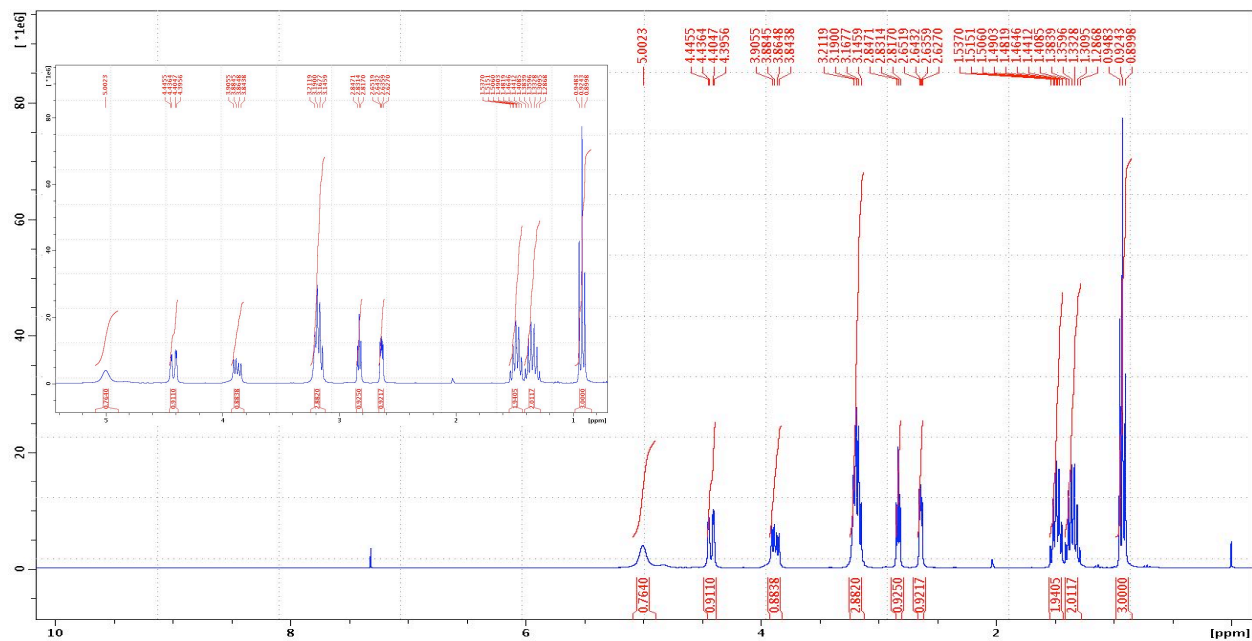

## Oxiran-2-ylmethyl butylcarbamate (8b). $^{13}\text{C}$ NMR

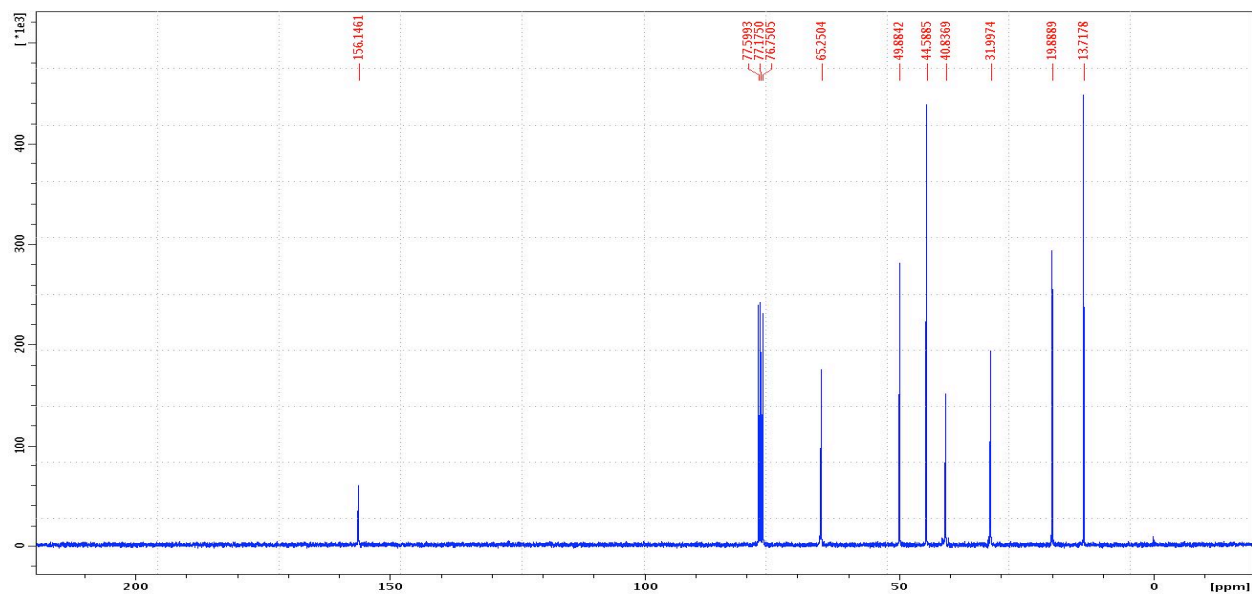

## Azide components 3{1-12}

### 3-azido-2-hydroxypropyl octanoate 3{1}. $^1\text{H}$ NMR

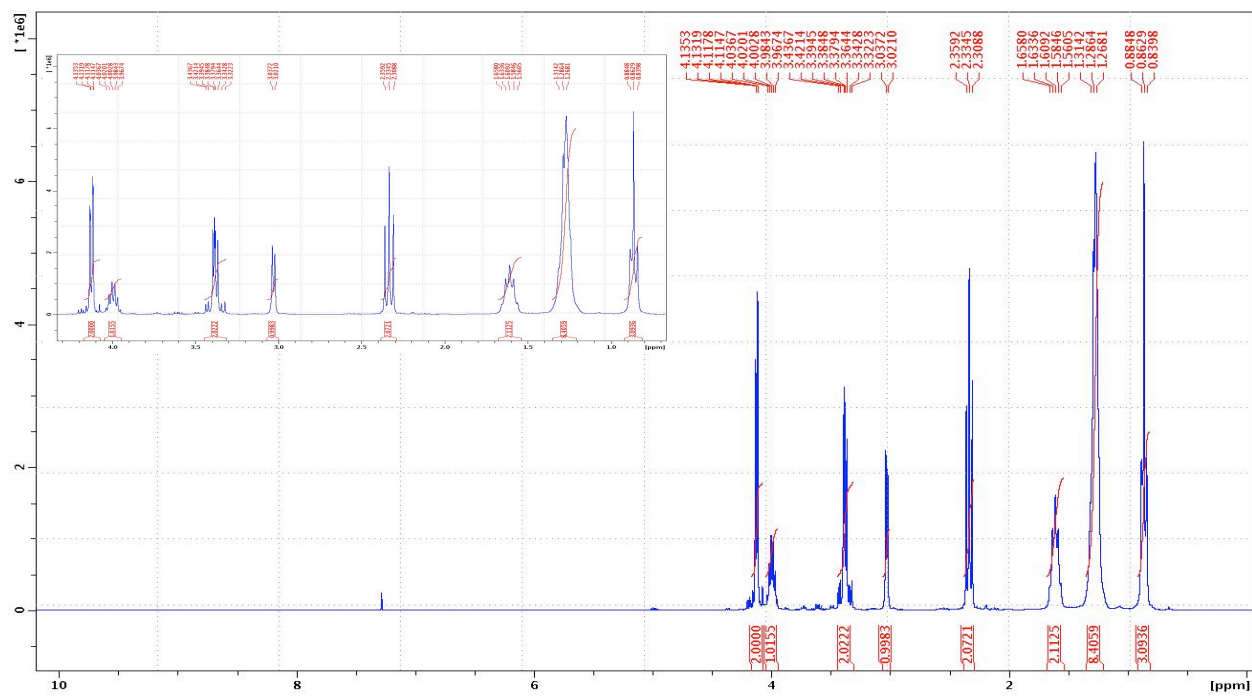

### 3-azido-2-hydroxypropyl octanoate 3{1}. <sup>13</sup>C NMR

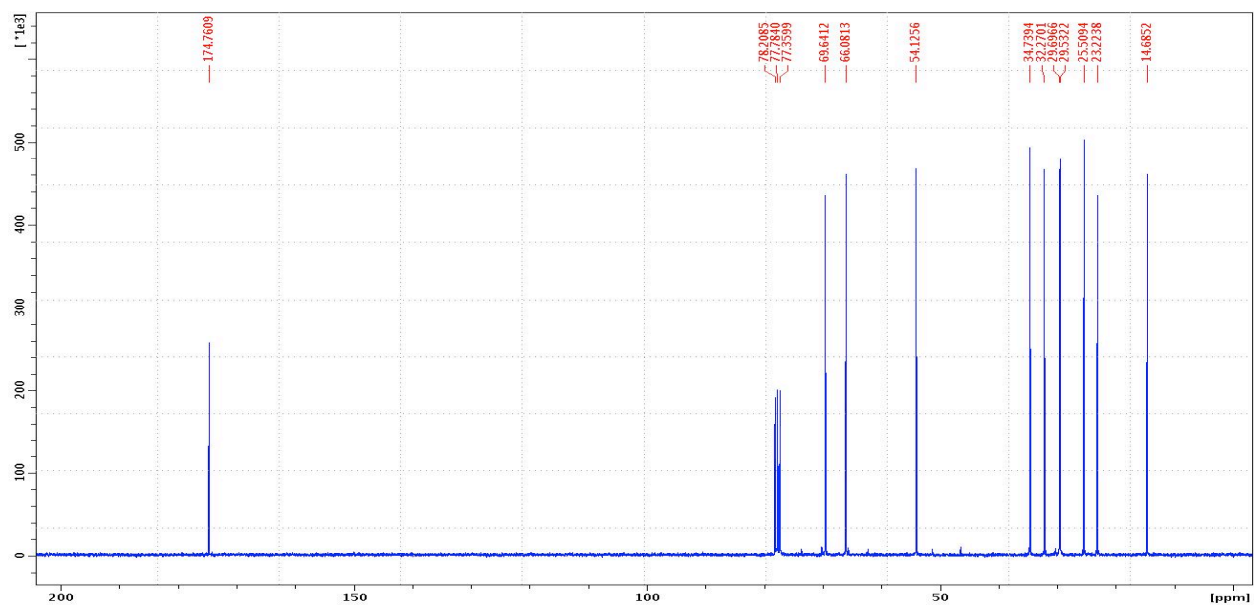

### 3-azido-2-hydroxypropyl benzoate 3{2}. <sup>1</sup>H NMR

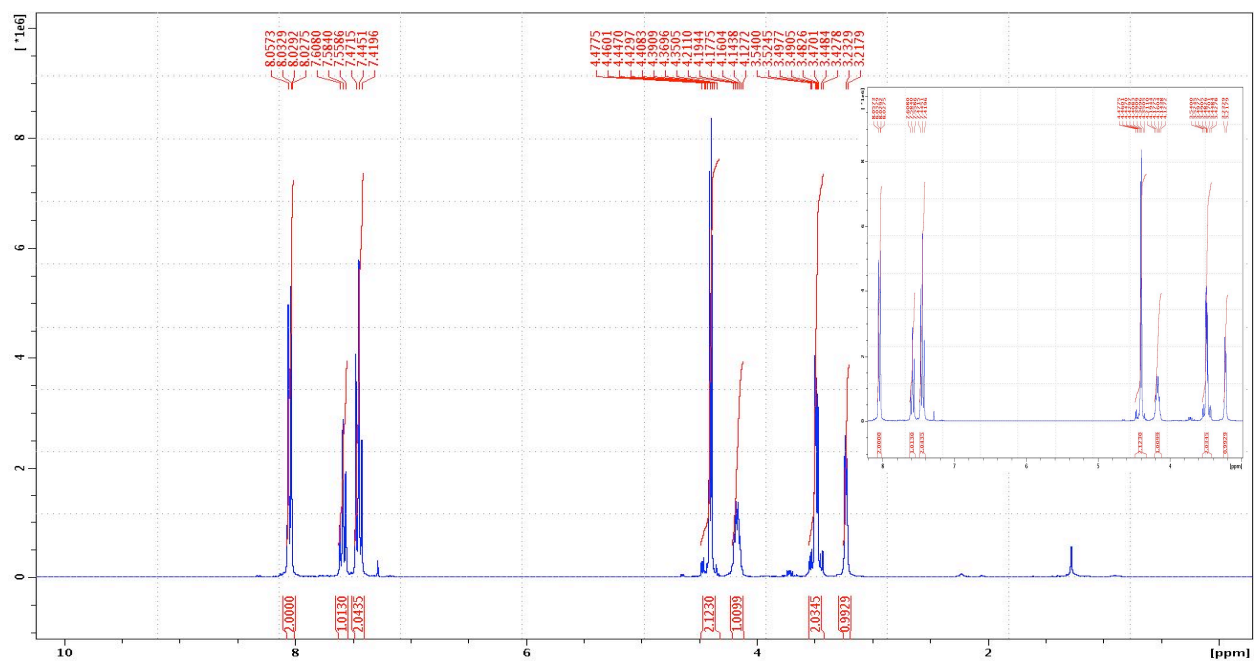

### 3-azido-2-hydroxypropyl benzoate 3{2}. <sup>13</sup>C NMR

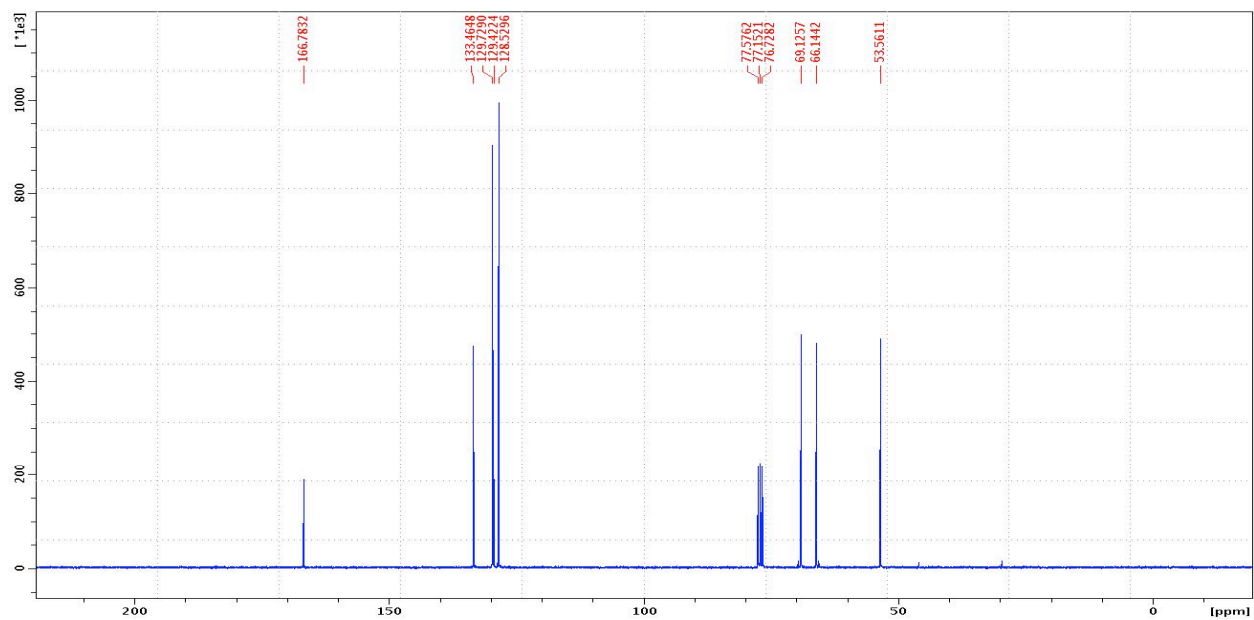

### 3-azido-2-hydroxypropyl cyclohexanecarboxylate 3{3}. <sup>1</sup>H NMR

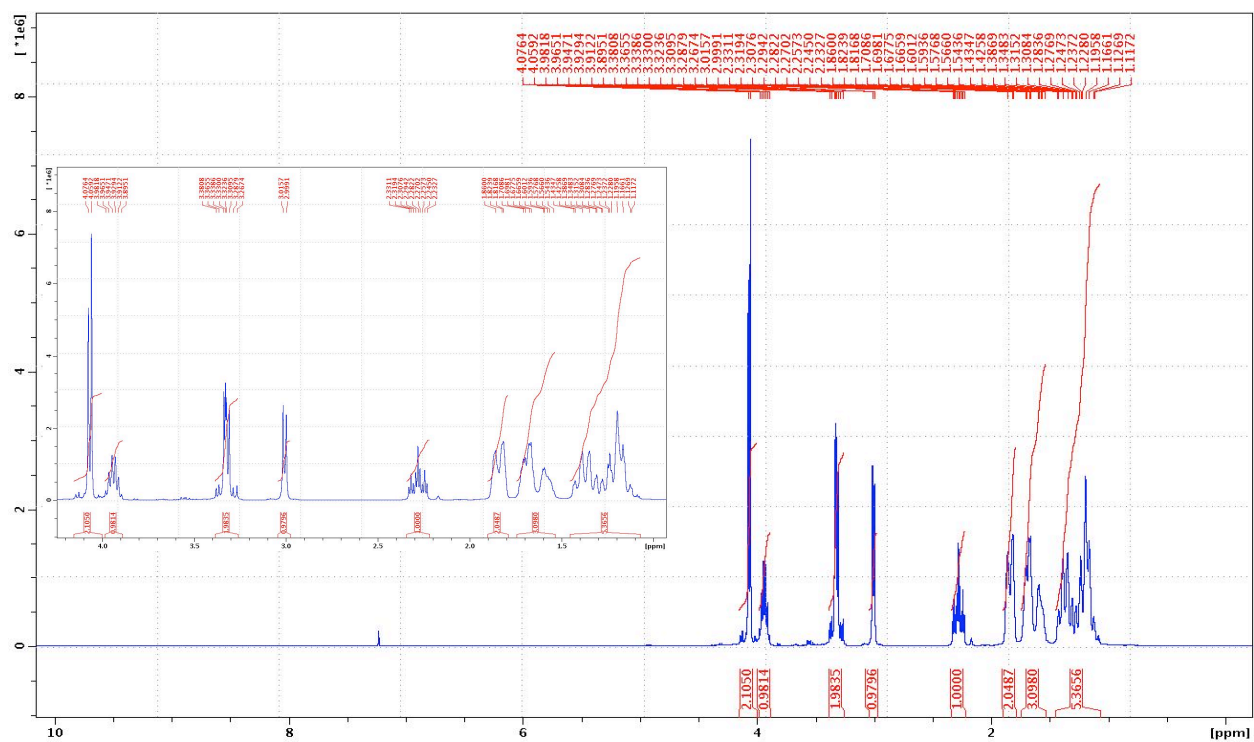

### 3-azido-2-hydroxypropyl cyclohexanecarboxylate 3{3}. <sup>13</sup>C NMR

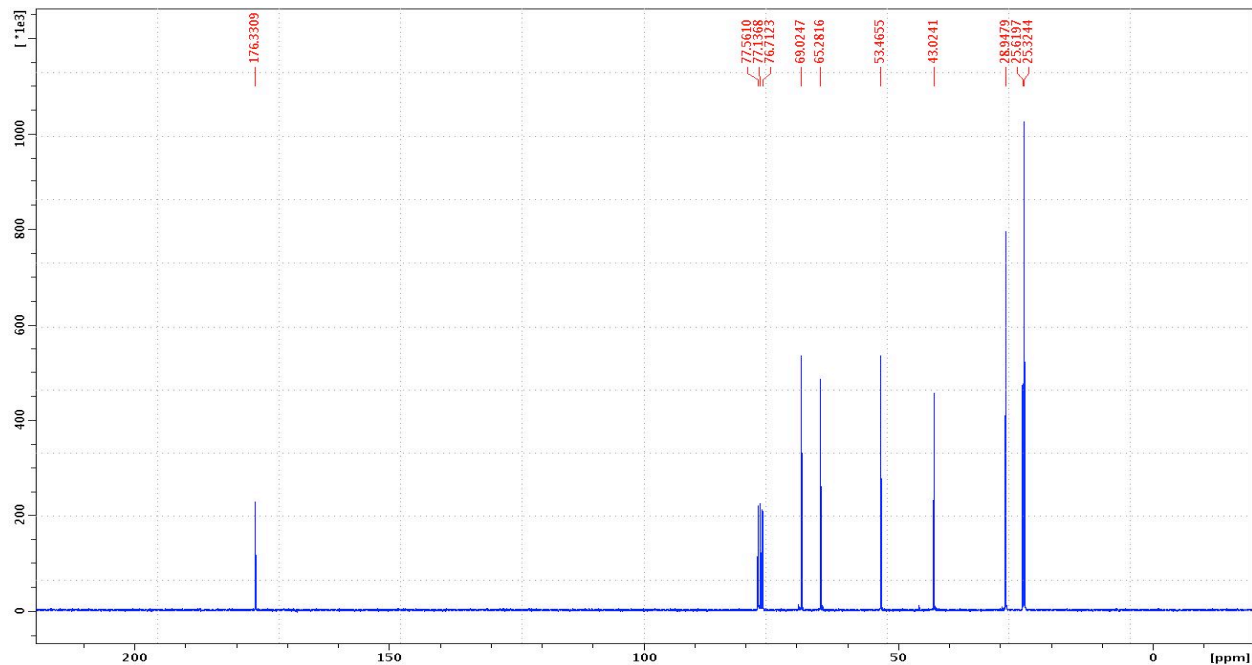

### 3-azido-2-hydroxypropyl benzylcarbamate 3{4}. <sup>1</sup>H NMR

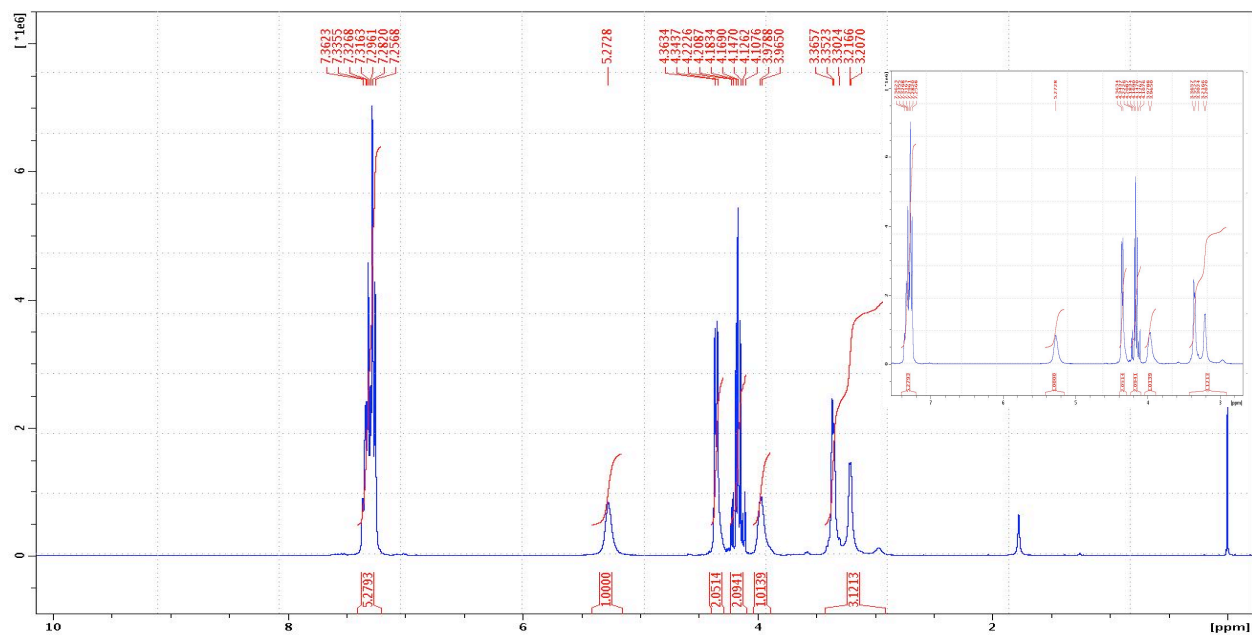

**3-azido-2-hydroxypropyl benzylcarbamate 3{4}. <sup>13</sup>C NMR**

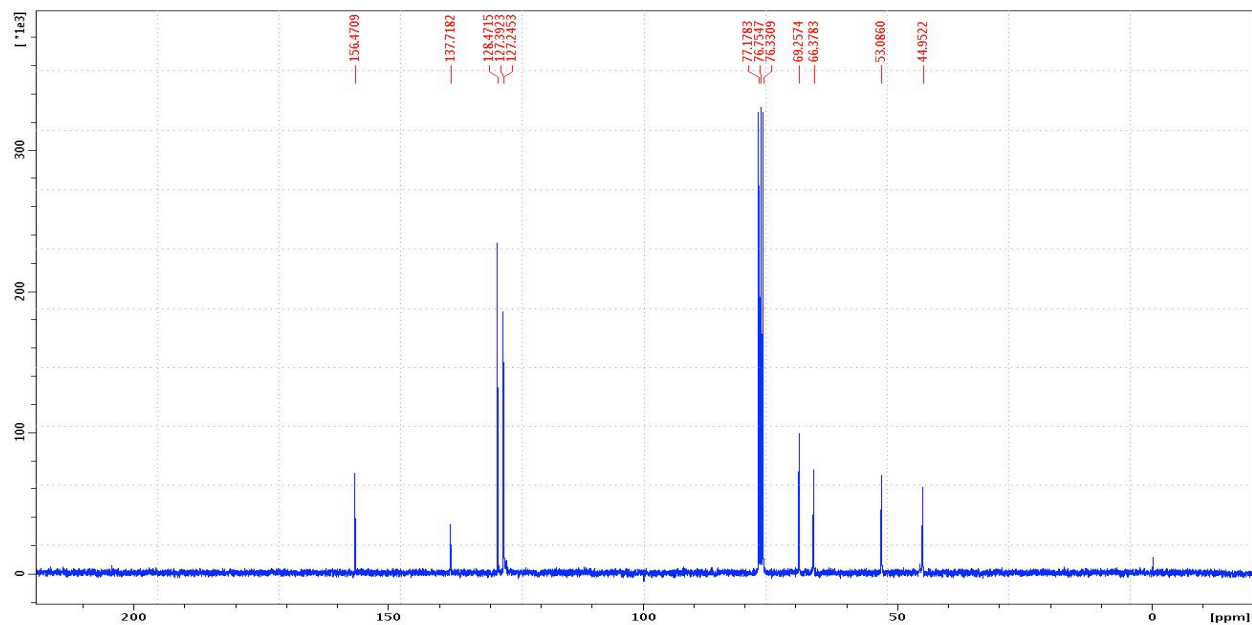

**3-azido-2-hydroxypropyl butylcarbamate 3{5}. <sup>1</sup>H NMR**

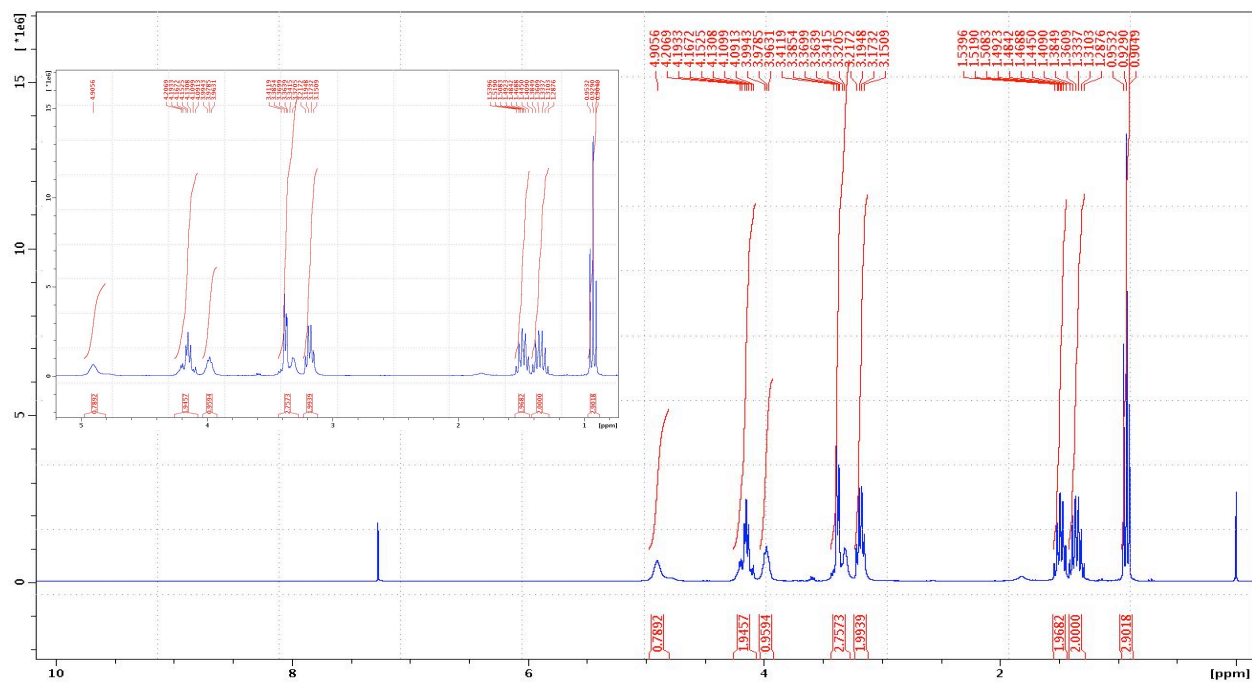

### 3-azido-2-hydroxypropyl butylcarbamate 3{5}. <sup>13</sup>C NMR

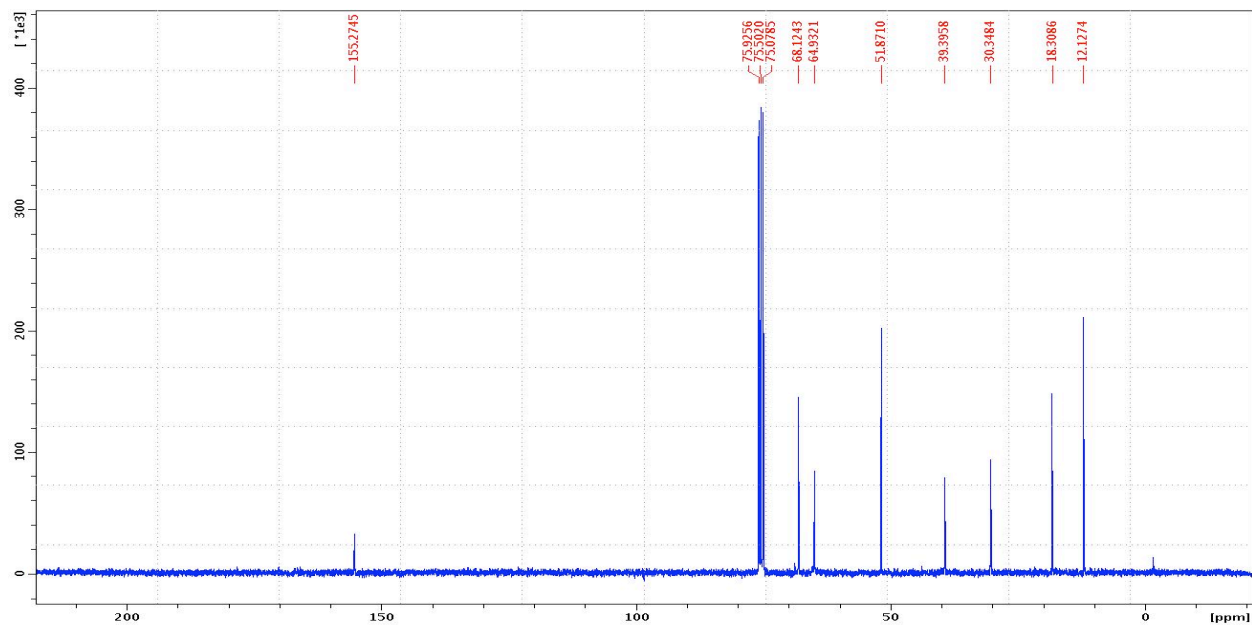

### 2-azido-1-phenylethanol 3{6}. <sup>1</sup>H NMR

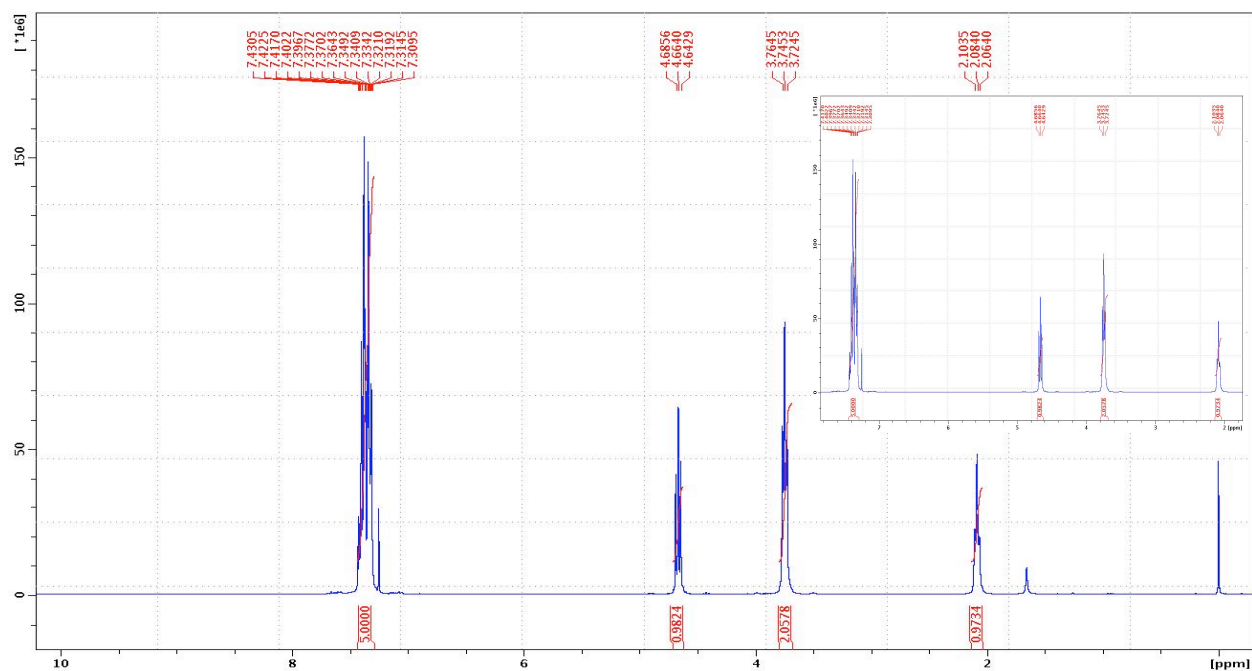

**2-azido-1-phenylethanol 3{6}. <sup>13</sup>C NMR**

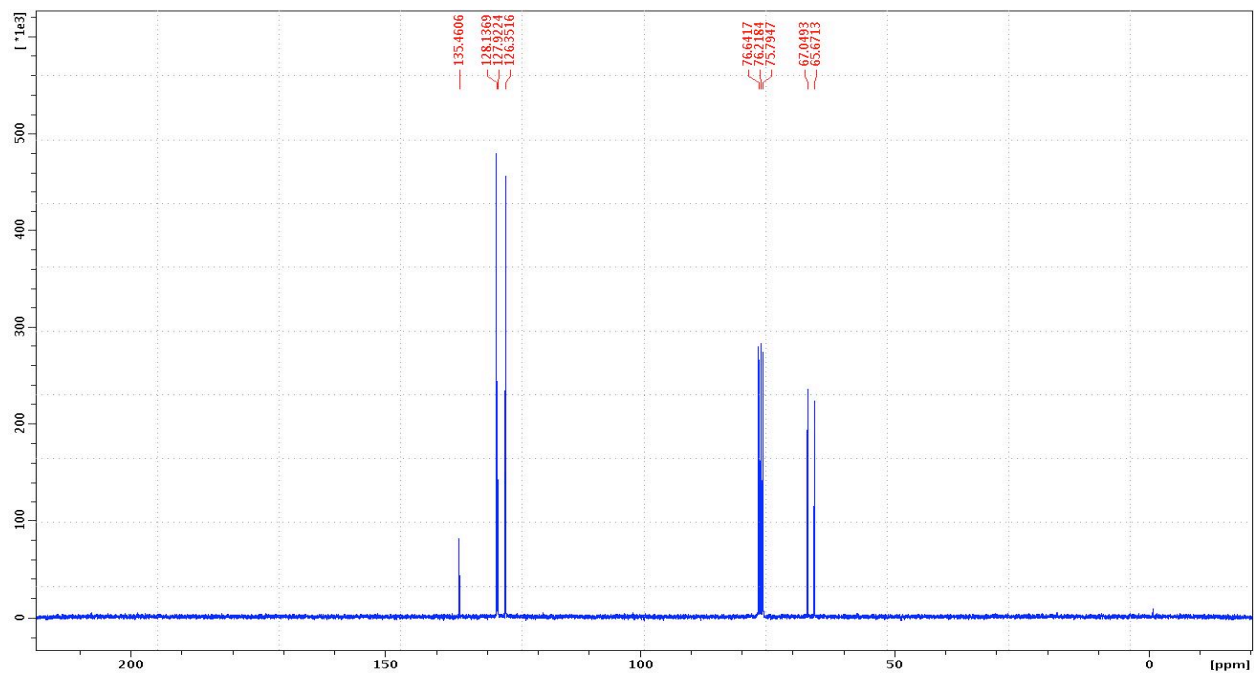

**2-azidohexan-2-ol 3{7}. <sup>1</sup>H NMR**

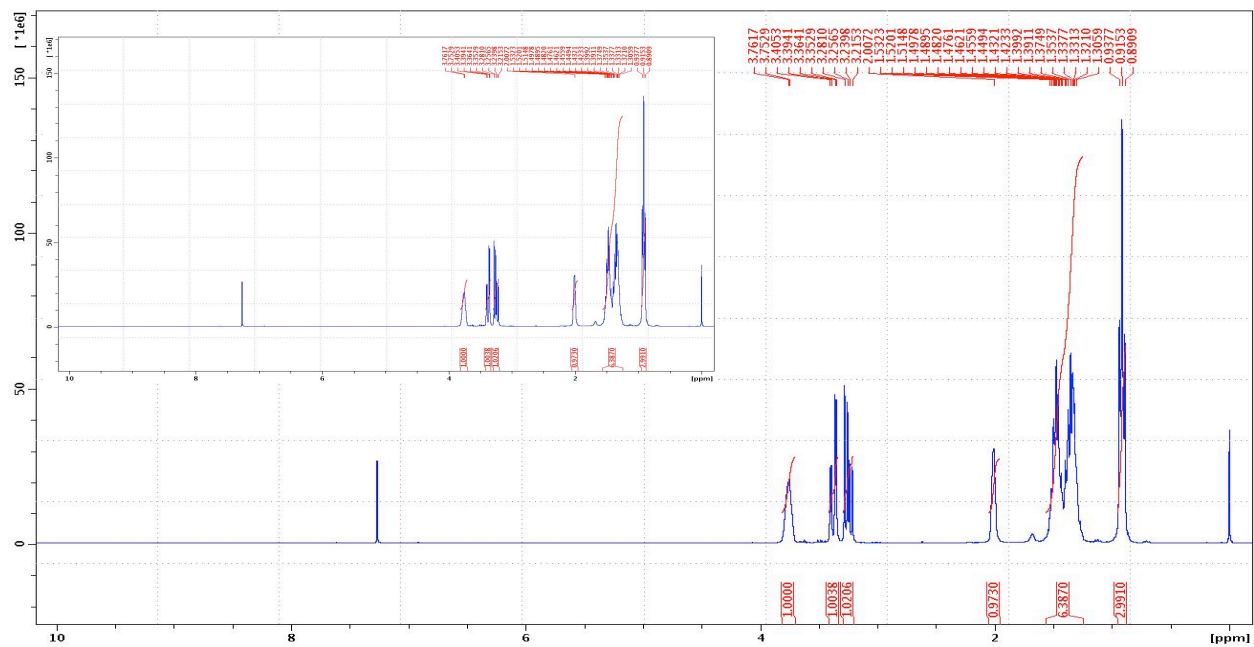



## 2-azidohexan-2-ol 3{7}. <sup>13</sup>C NMR

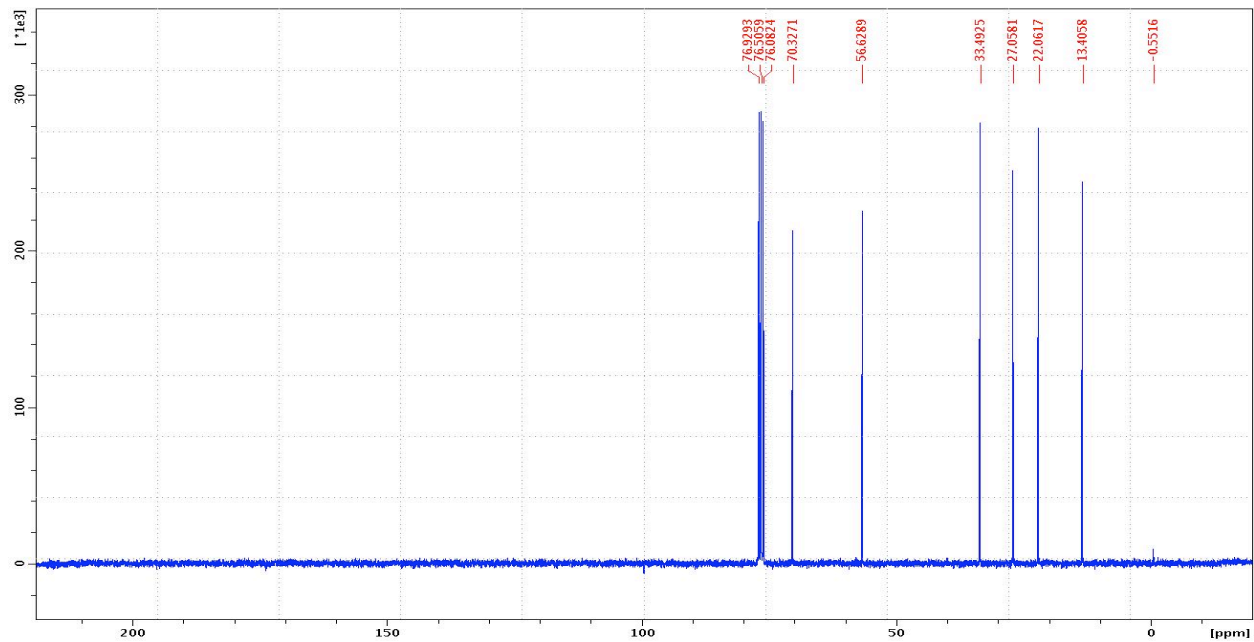

## 1-azido-3-(benzyloxy)propan-2-ol 3{8}. <sup>1</sup>H NMR

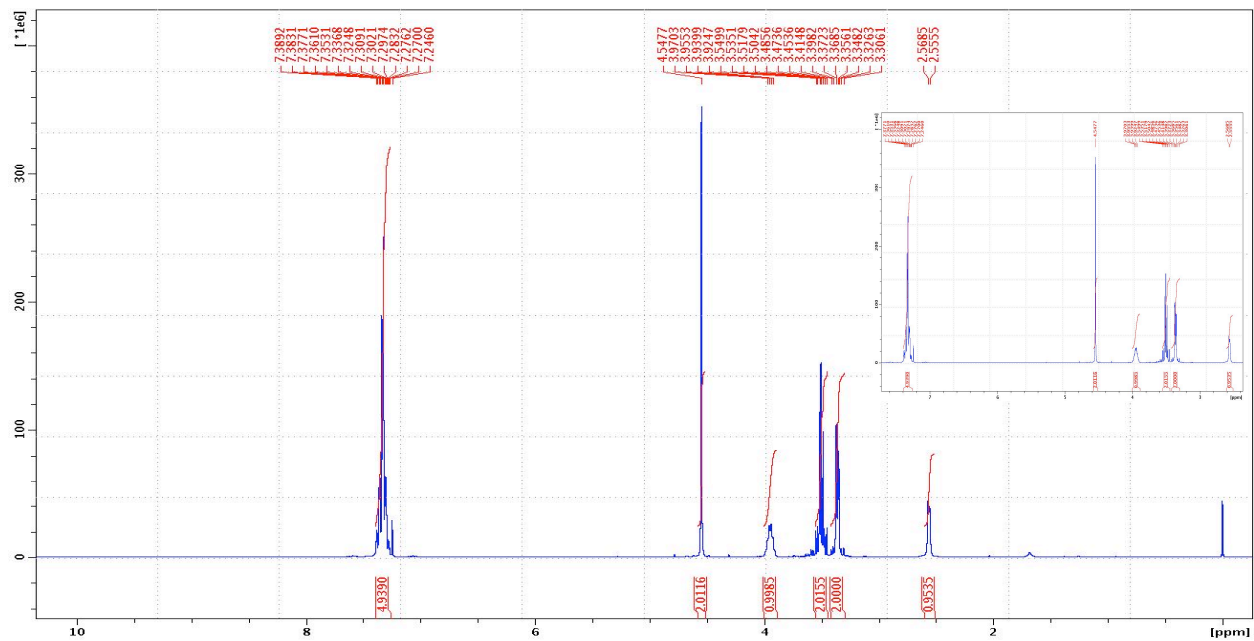

**1-azido-3-(benzyloxy)propan-2-ol 3{8}. <sup>13</sup>C NMR**

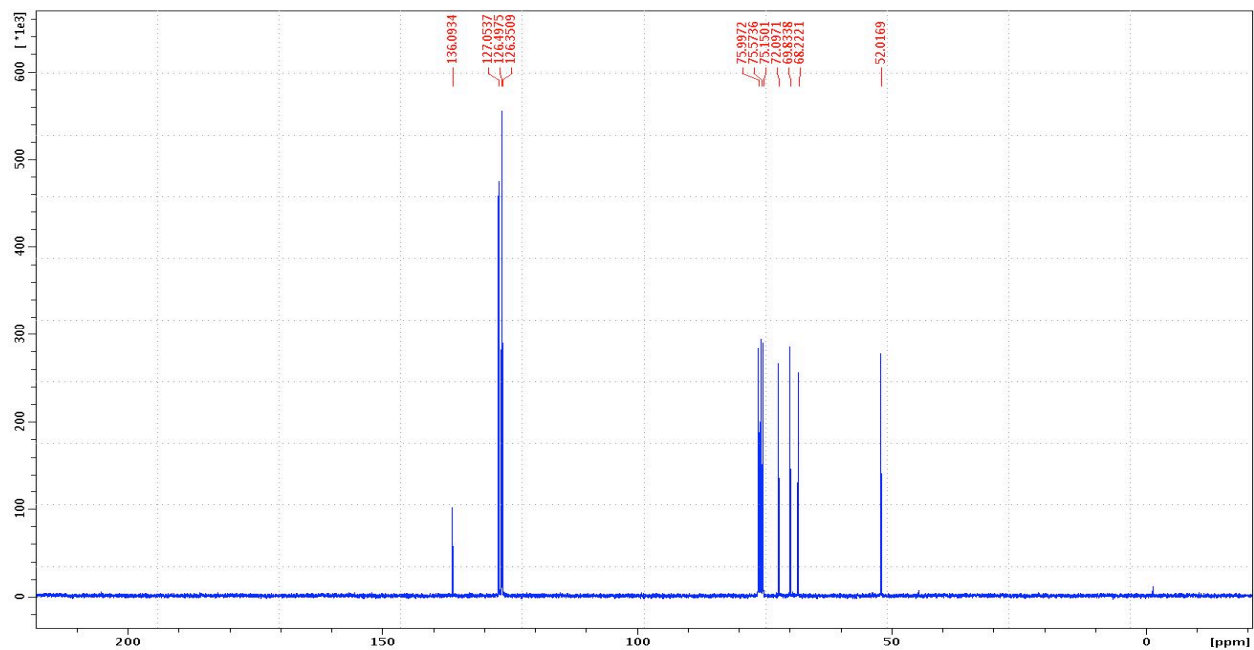

**Trans-2-azidocyclohexanol 3{9}. <sup>1</sup>H NMR**

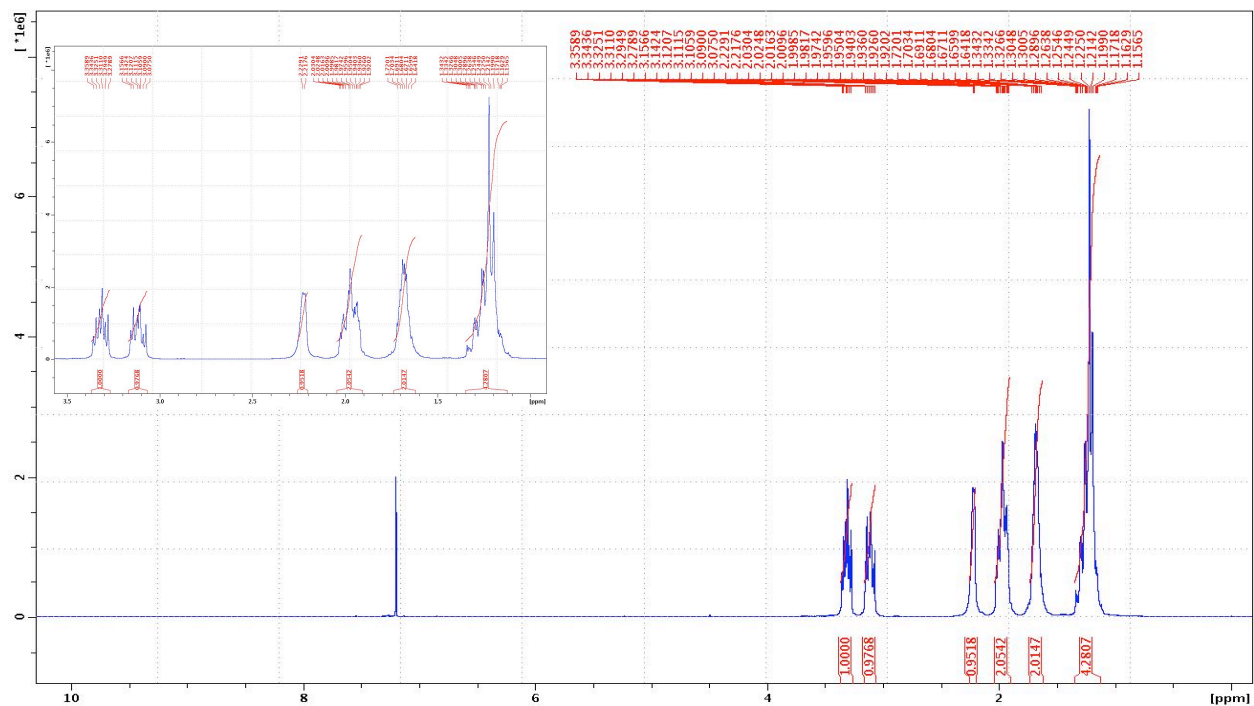

**Trans-2-azidocyclohexanol 3{9}. <sup>13</sup>C NMR**

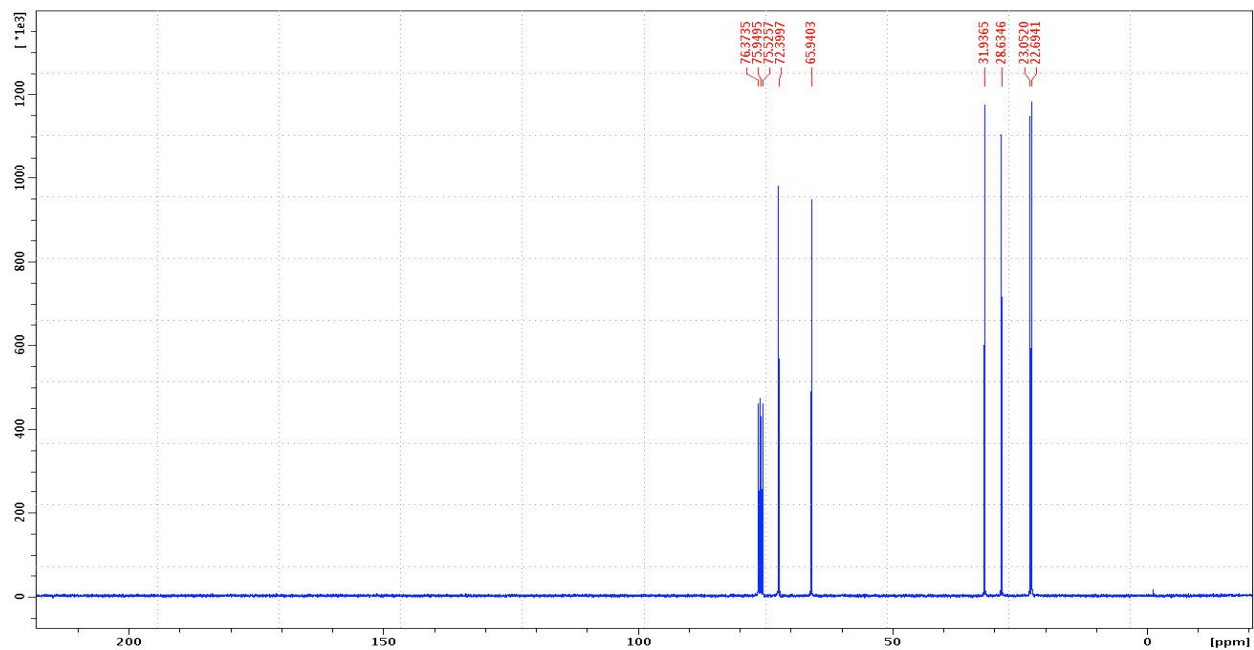

**Trans-2-azidocyclohexyl benzoate 3{10}. <sup>1</sup>H NMR**

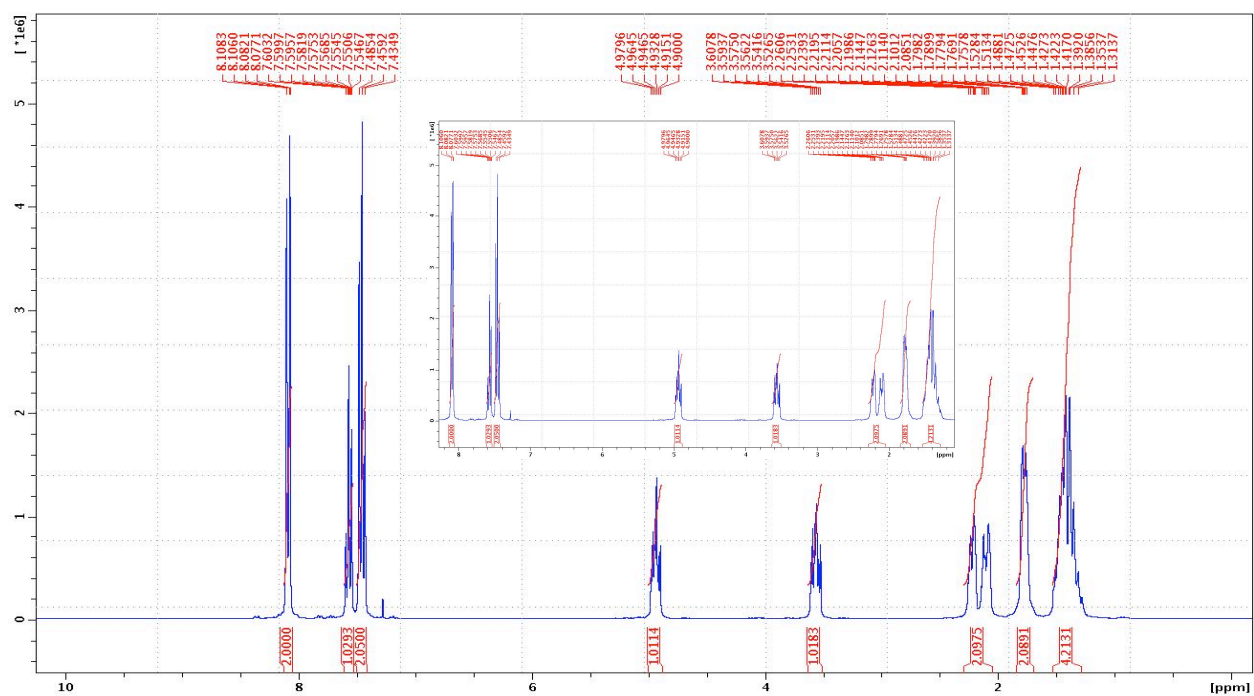

**Trans-2-azidocyclohexyl benzoate 3{10}. <sup>13</sup>C NMR**

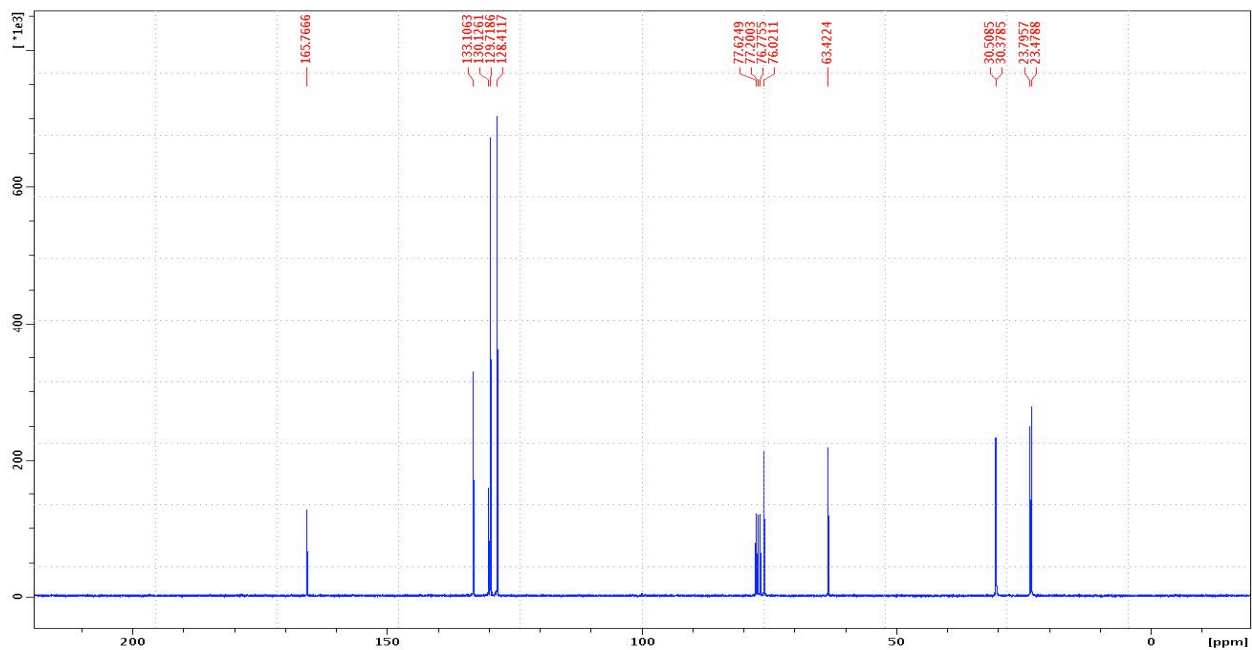

**Trans-2-azidocyclohexyl 2-phenylacetate 3{11}. <sup>1</sup>H NMR**

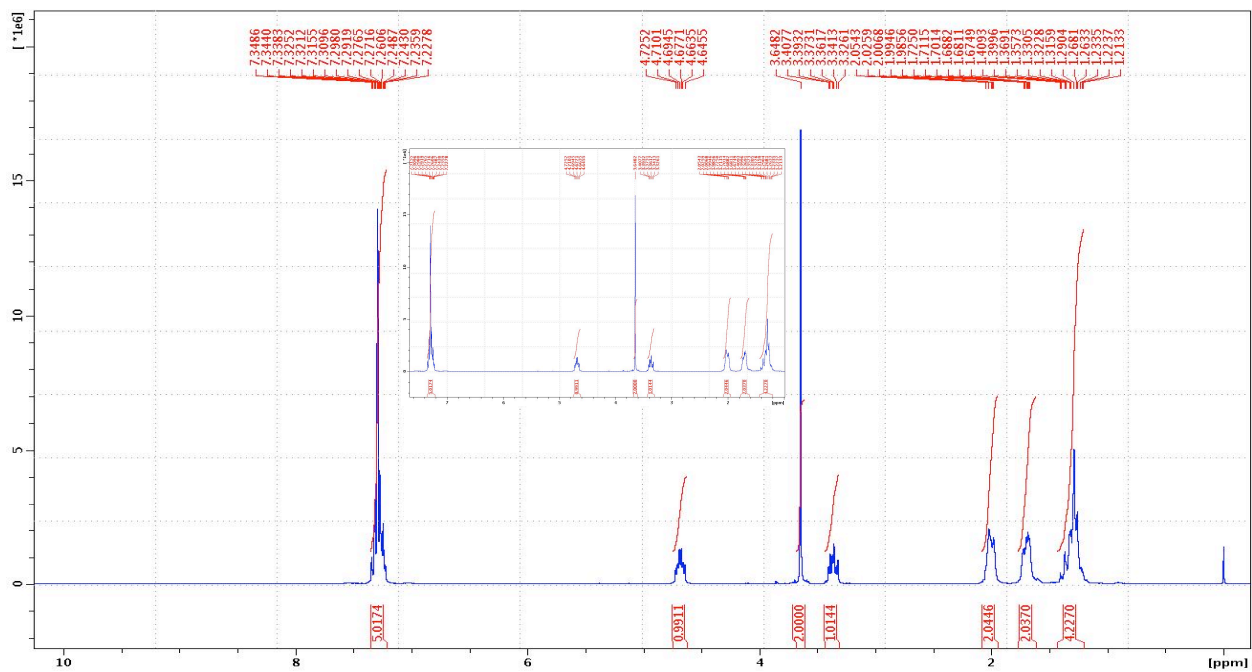

**Trans-2-azidocyclohexyl 2-phenylacetate 3{11}. <sup>13</sup>C NMR**

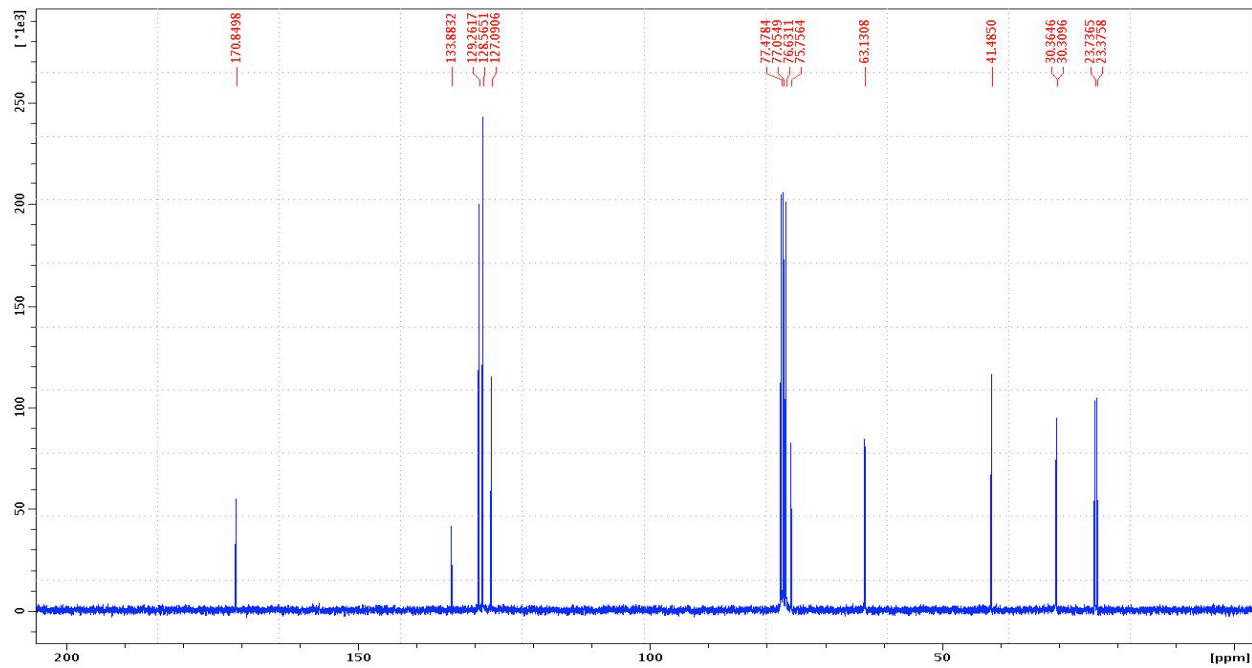

**Trans-2-azidocyclohexyl 2-phenoxyacetate 3{12}. <sup>1</sup>H NMR**

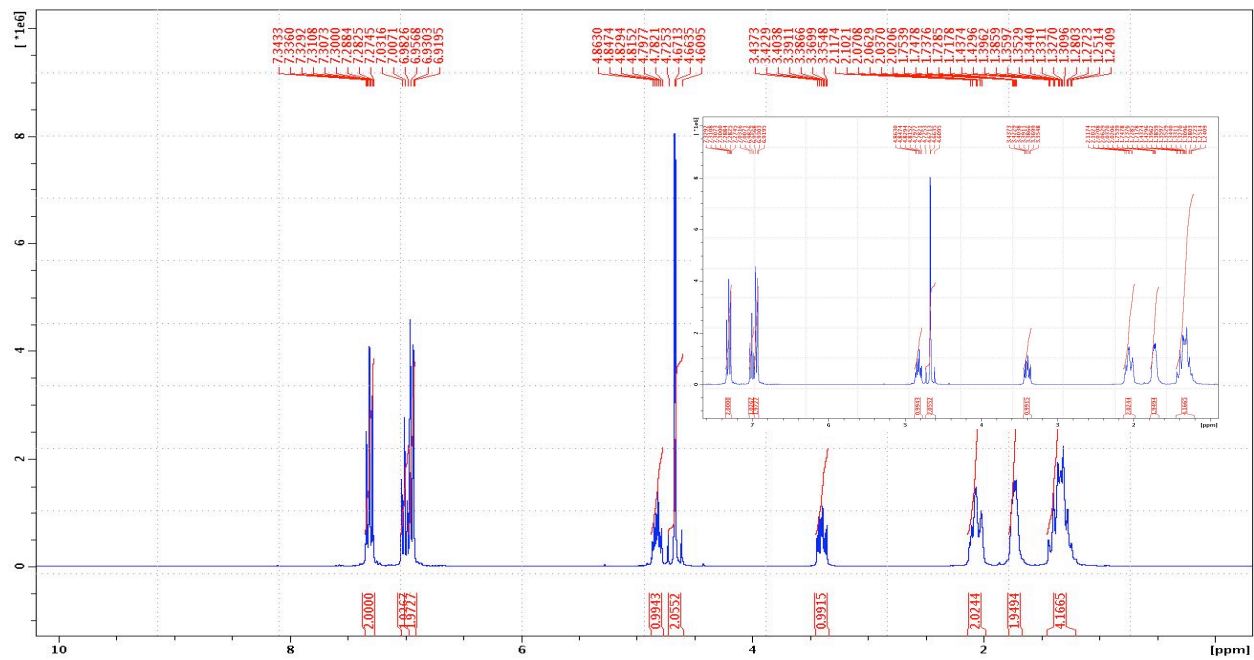



**N-butyl-N-(prop-2-ynyl)butan-1-amine 4{1}. <sup>13</sup>C NMR**

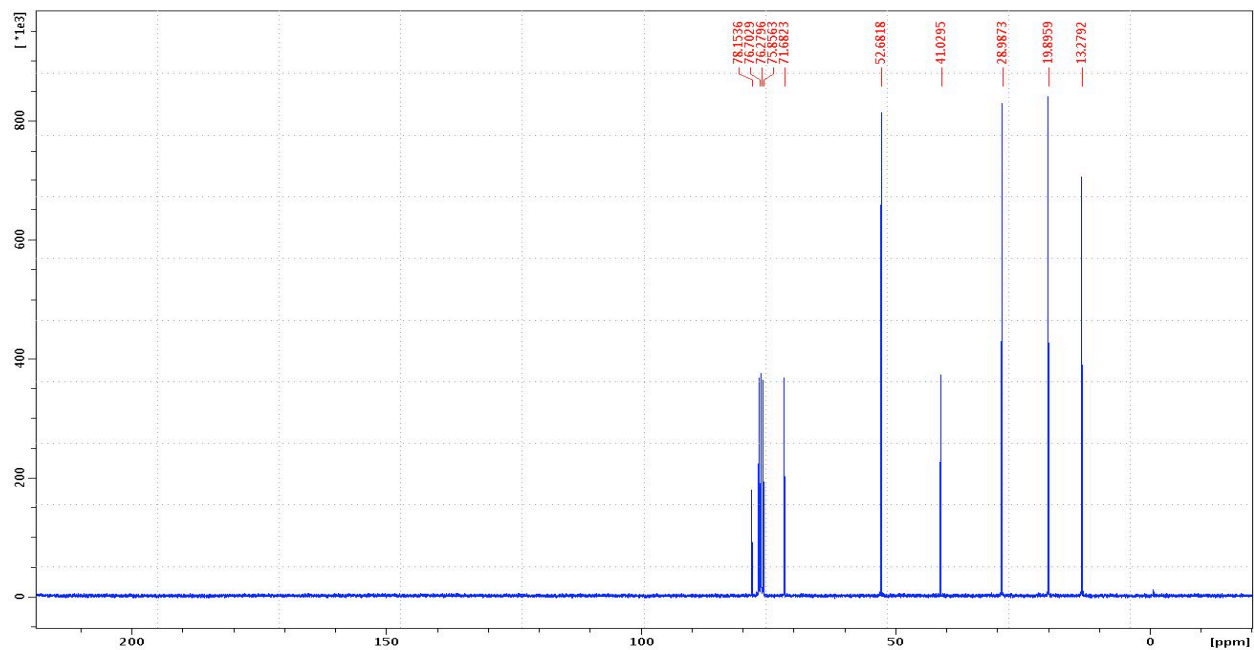

**N-methyl-N-(3-phenylpropyl)prop-2-yn-1-amine 4{2}. <sup>1</sup>H NMR**

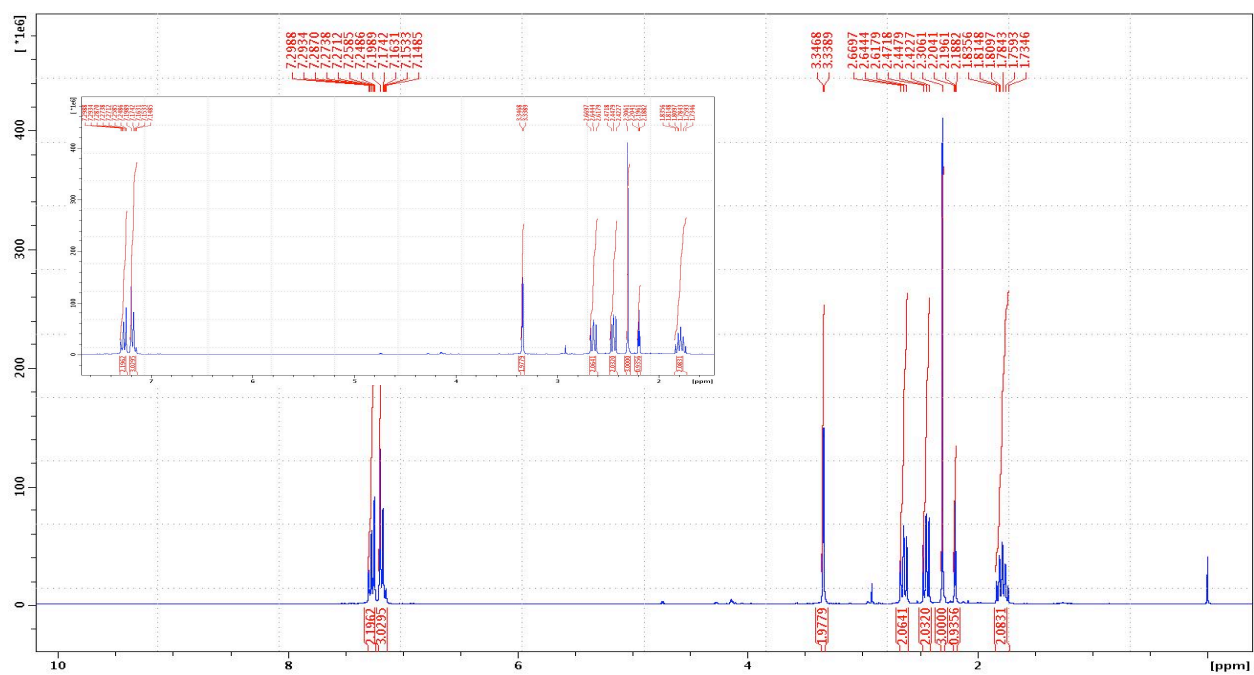

**N-methyl-N-(3-phenylpropyl)prop-2-yn-1-amine 4{2}. <sup>13</sup>C NMR**

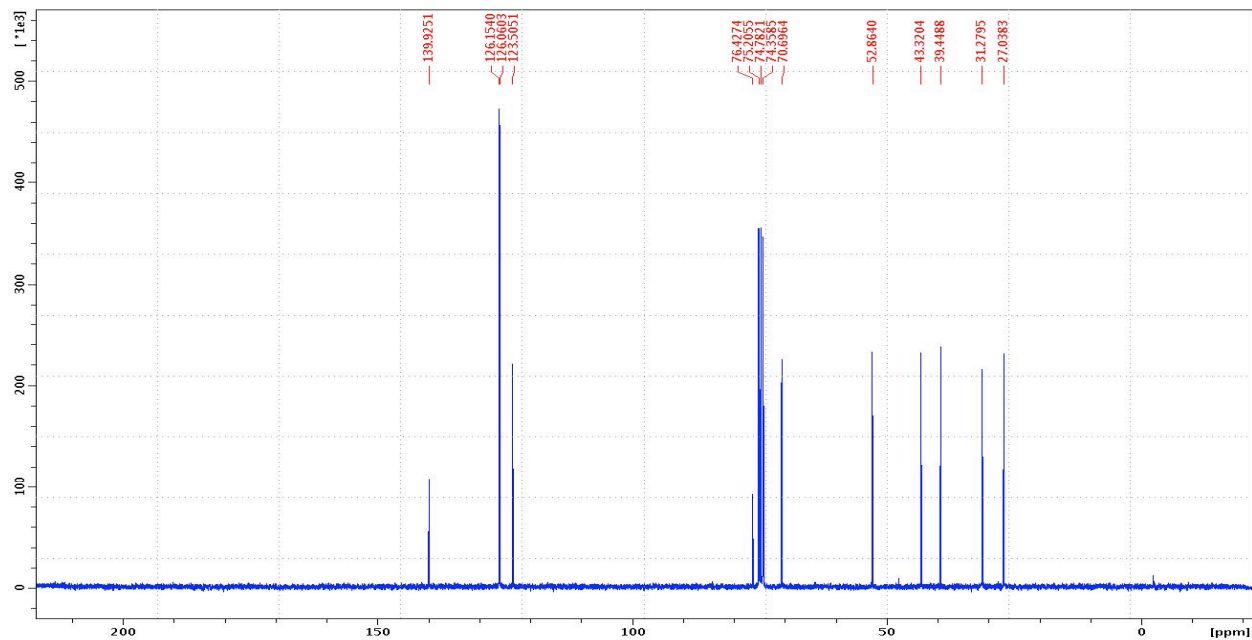

**N-methyl-N-phenethylprop-2-yn-1-amine 4{3}. <sup>1</sup>H NMR**

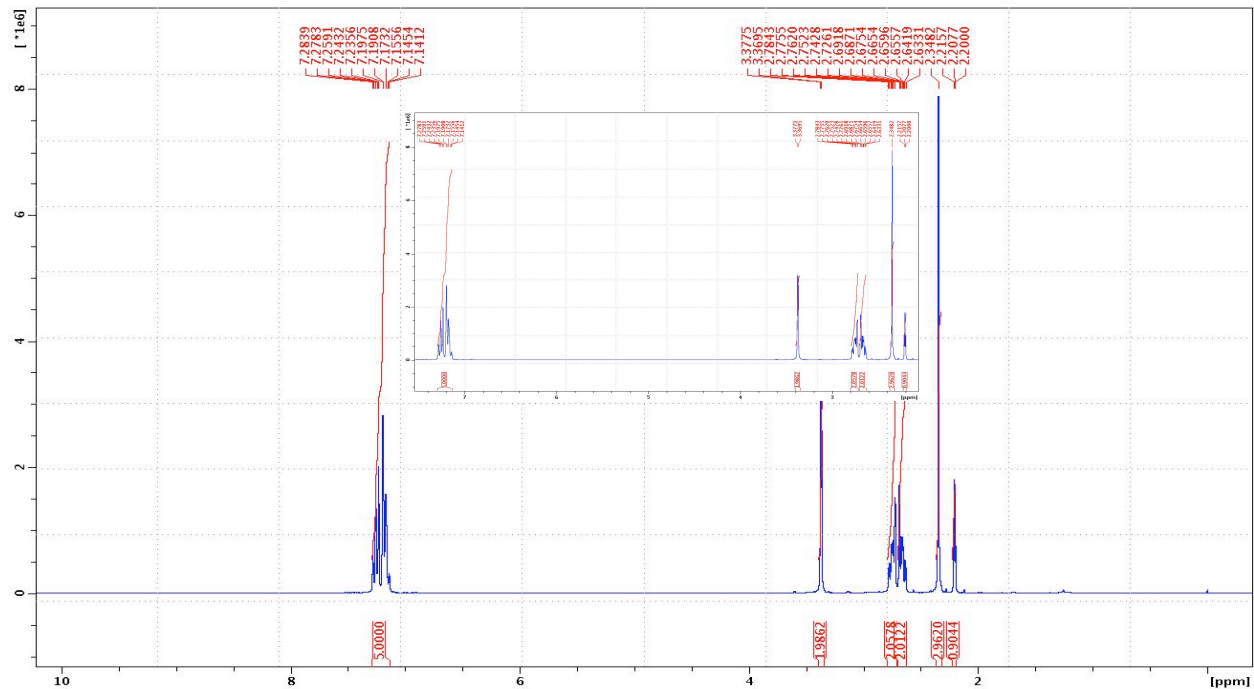



### N-methyl-N-phenethylprop-2-yn-1-amine 4{3}. <sup>13</sup>C NMR

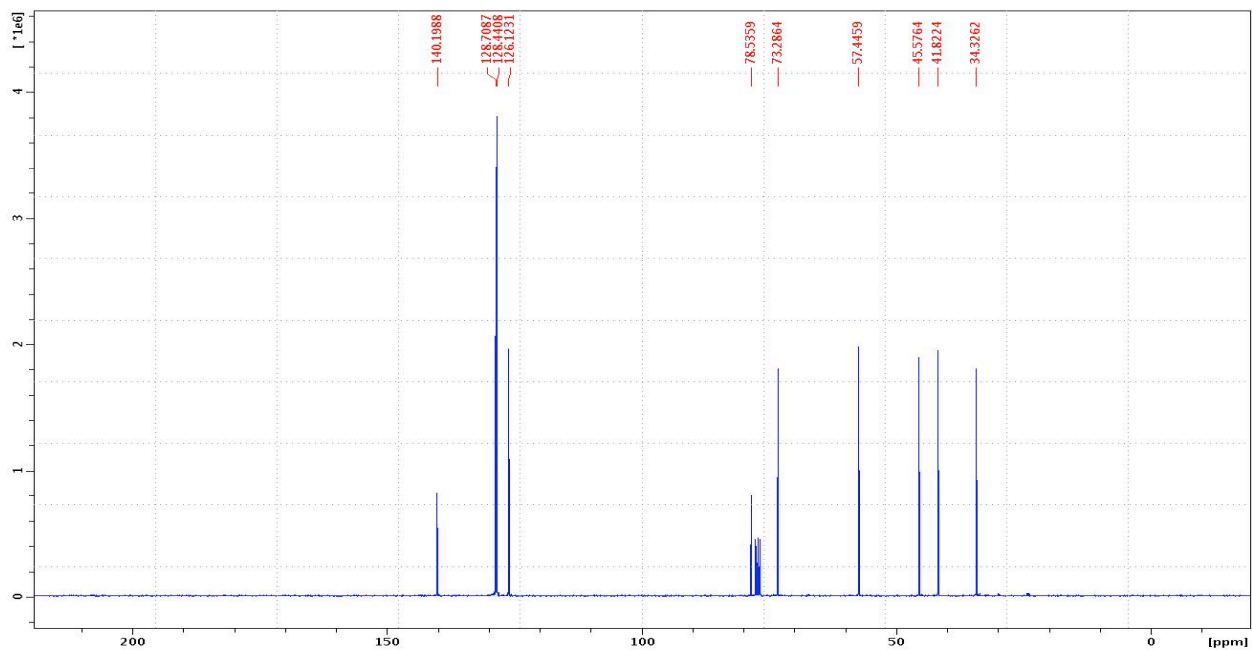

### 4-(prop-2-ynyl)morpholine 4{4}. <sup>1</sup>H NMR

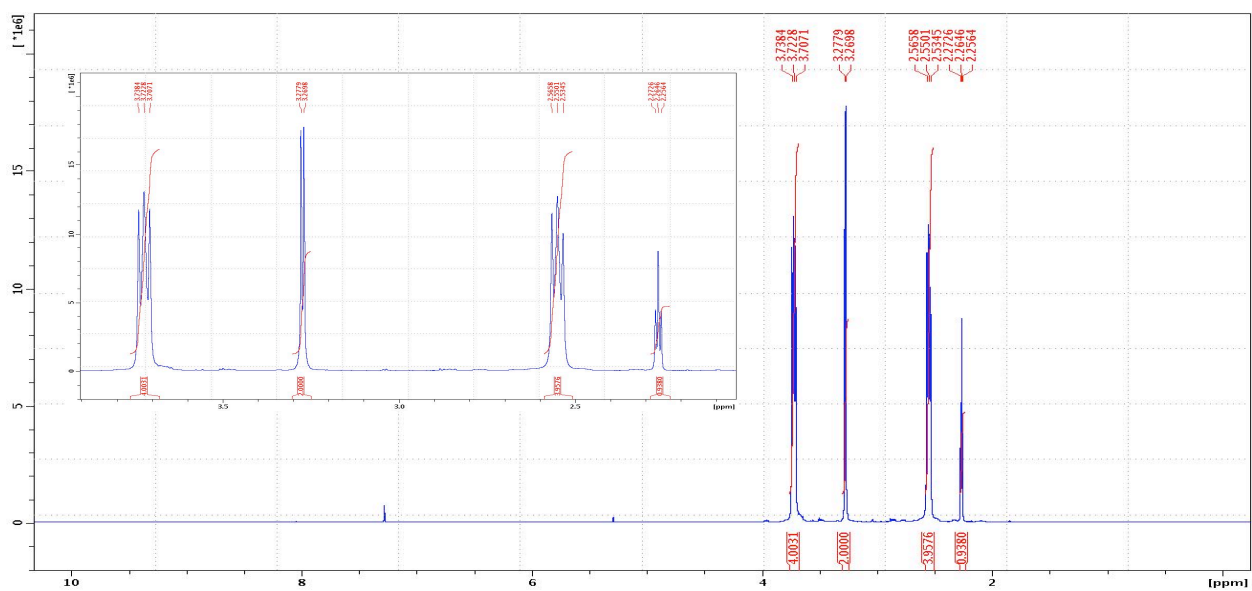

### 4-(prop-2-ynyl)morpholine 4{4}. <sup>13</sup>C NMR

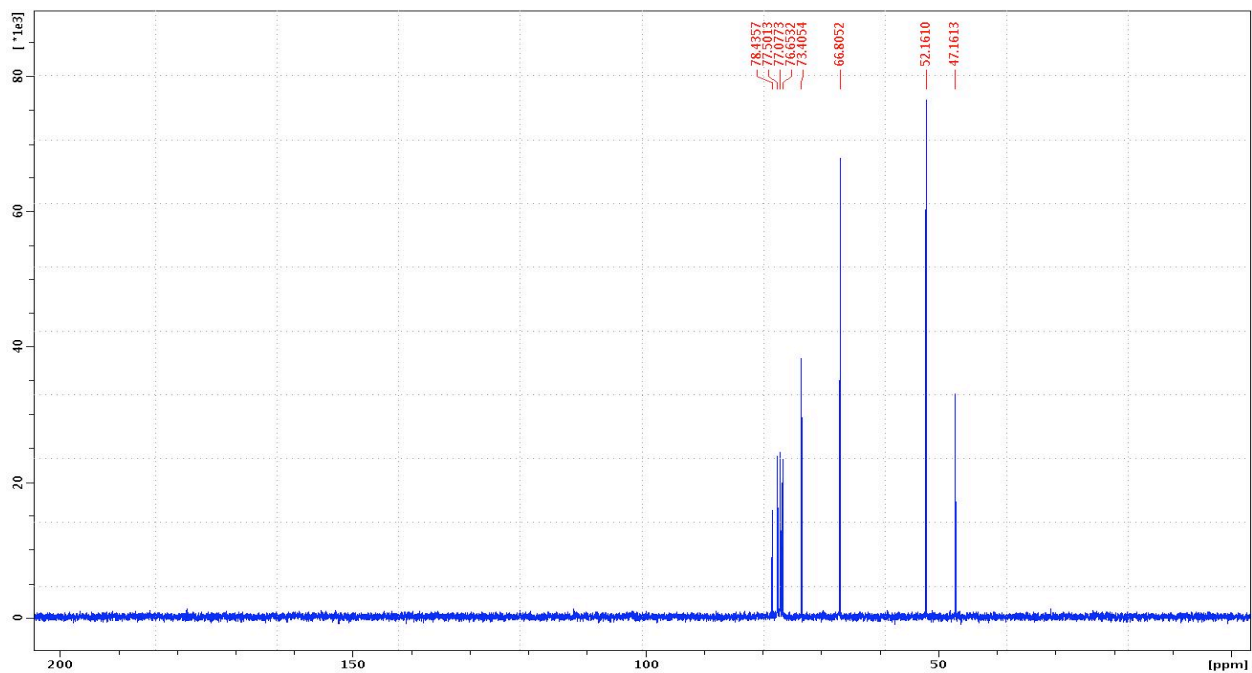

### 4-phenyl-1-(prop-2-ynyl)piperidine 4{5}. <sup>1</sup>H NMR

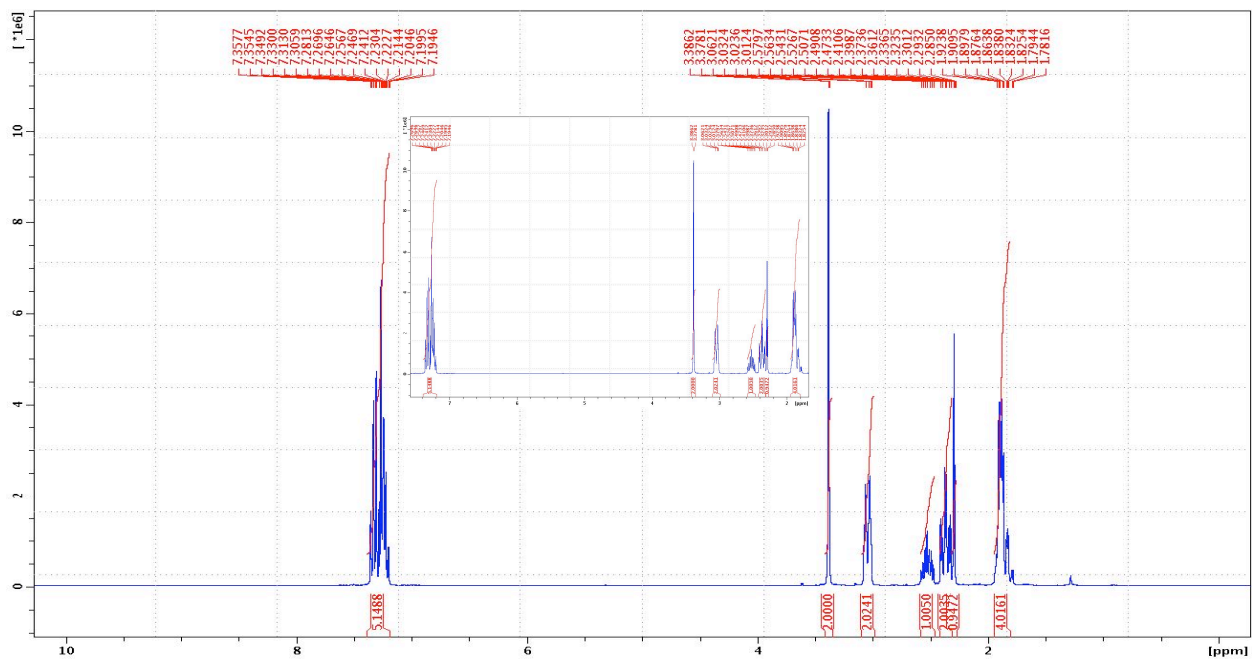

### 4-phenyl-1-(prop-2-ynyl)piperidine 4{5}. <sup>13</sup>C NMR

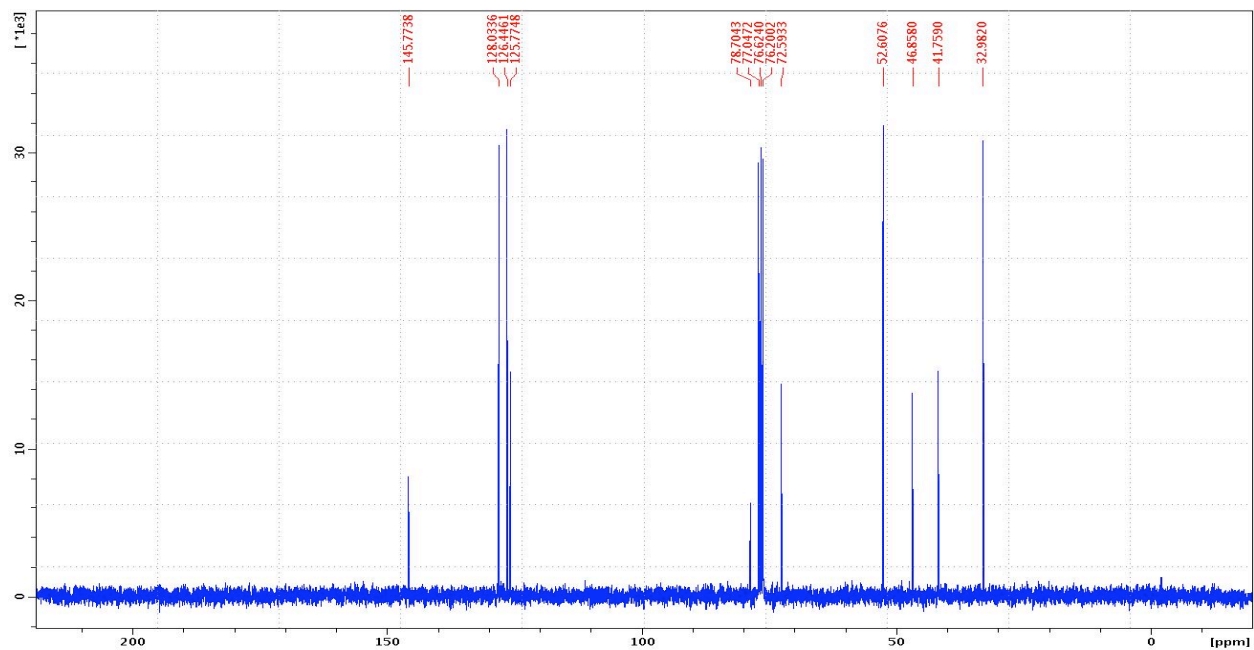

### 1-phenyl-4-(prop-2-ynyl)piperazine 4{6}. <sup>1</sup>H NMR

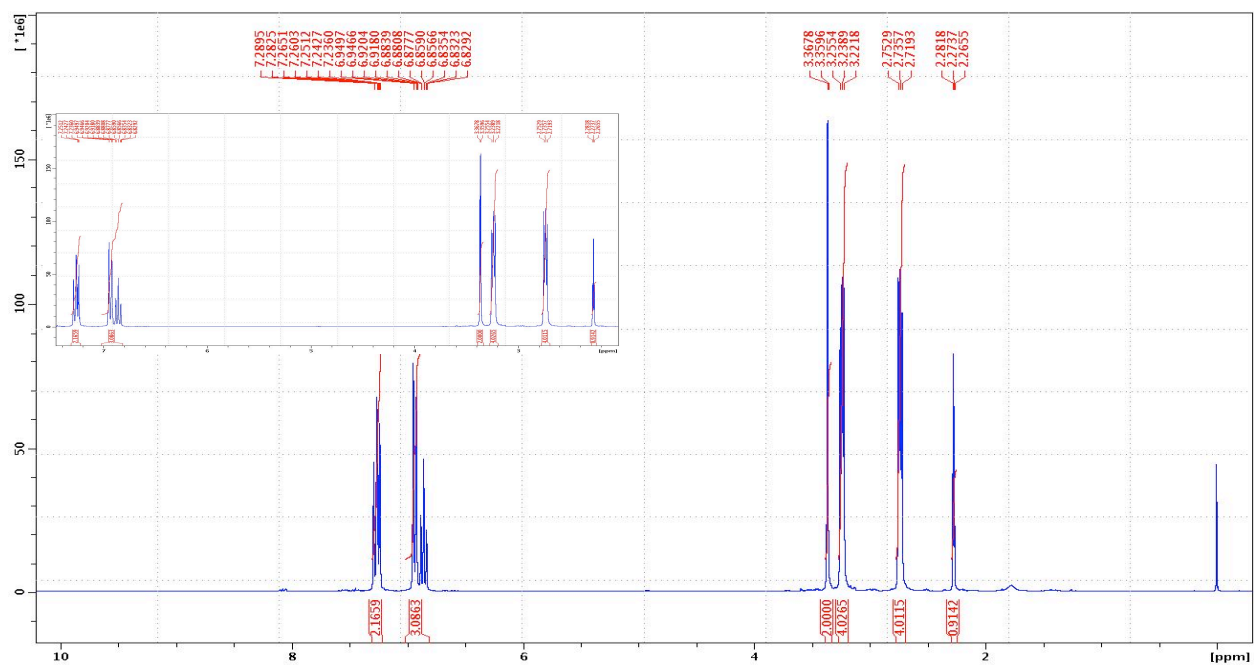



### Ethyl 1-(prop-2-ynyl)piperidine-3-carboxylate 4{7}. <sup>13</sup>C NMR

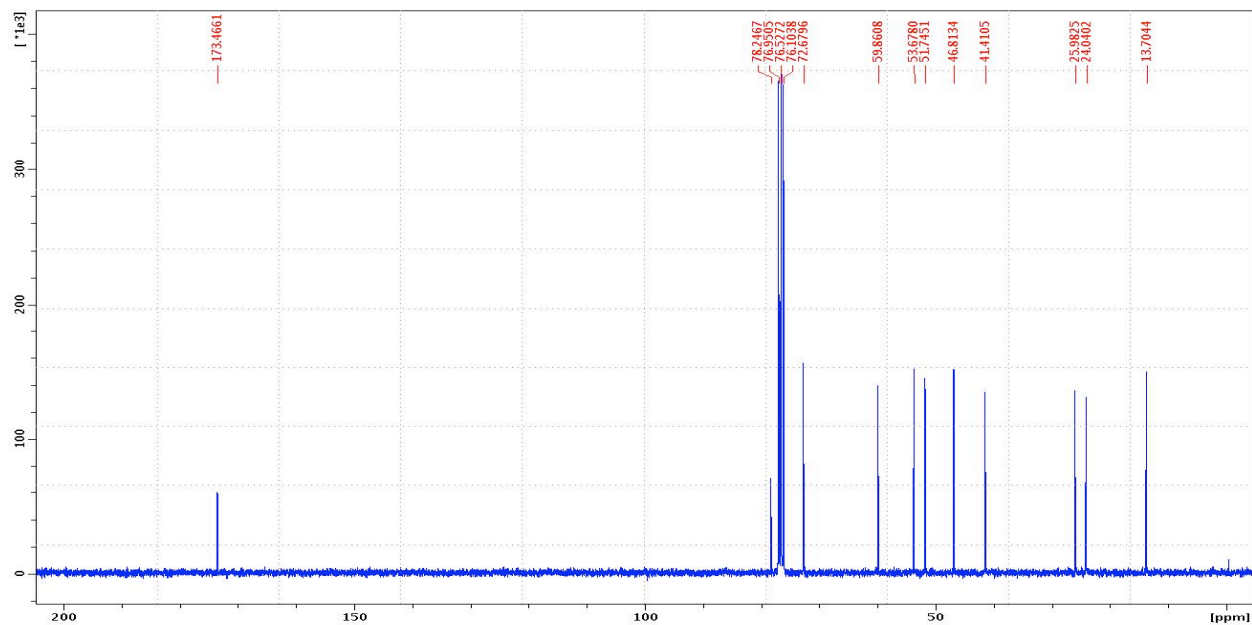

### N-(cyclohexylmethyl)-N-methylprop-2-yn-1-amine 4{8}. <sup>1</sup>H NMR

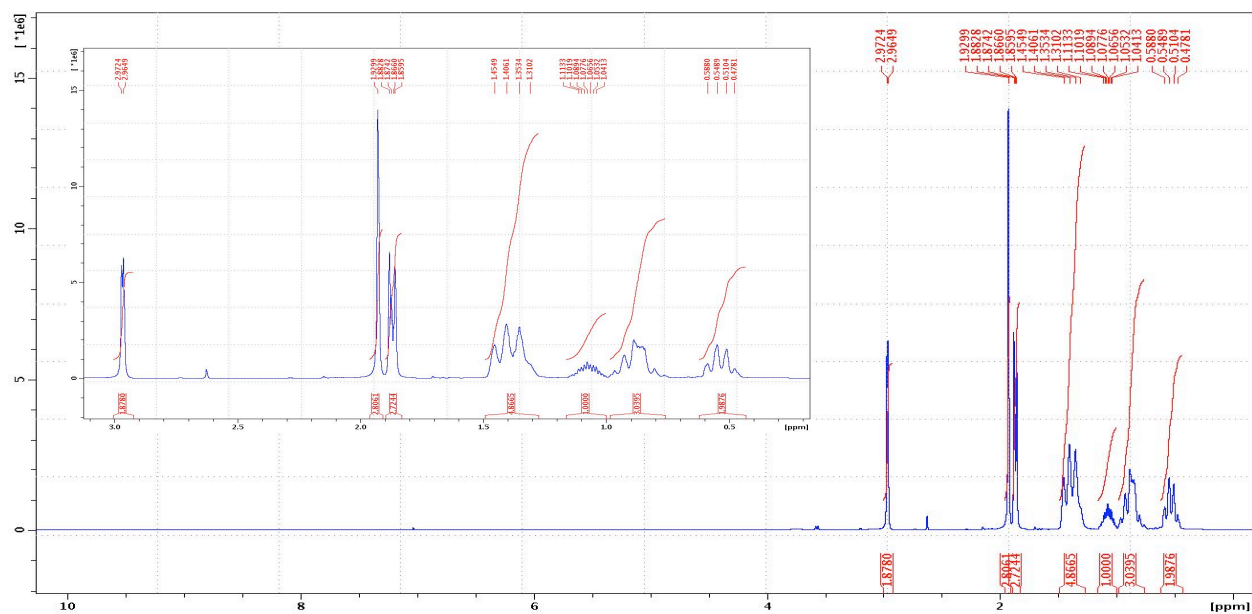

**N-(cyclohexylmethyl)-N-methylprop-2-yn-1-amine 4{8}. <sup>13</sup>C NMR**

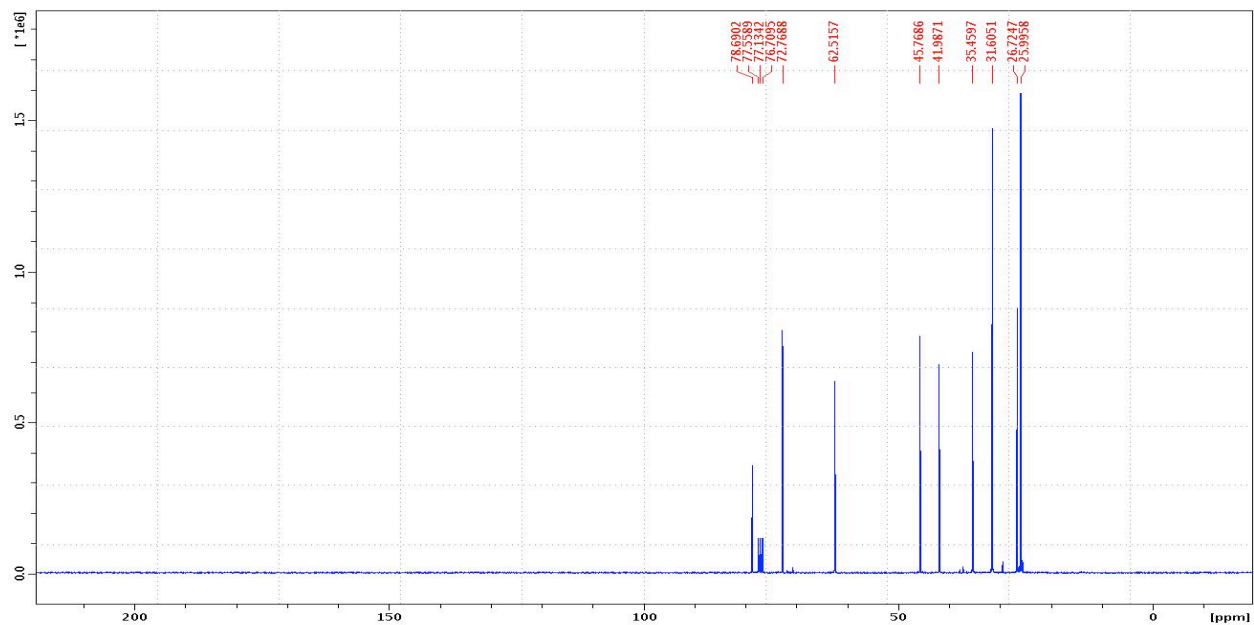

**N,3-dimethyl-N-(prop-2-ynyl)butan-1-amine 4{9}. <sup>1</sup>H NMR**

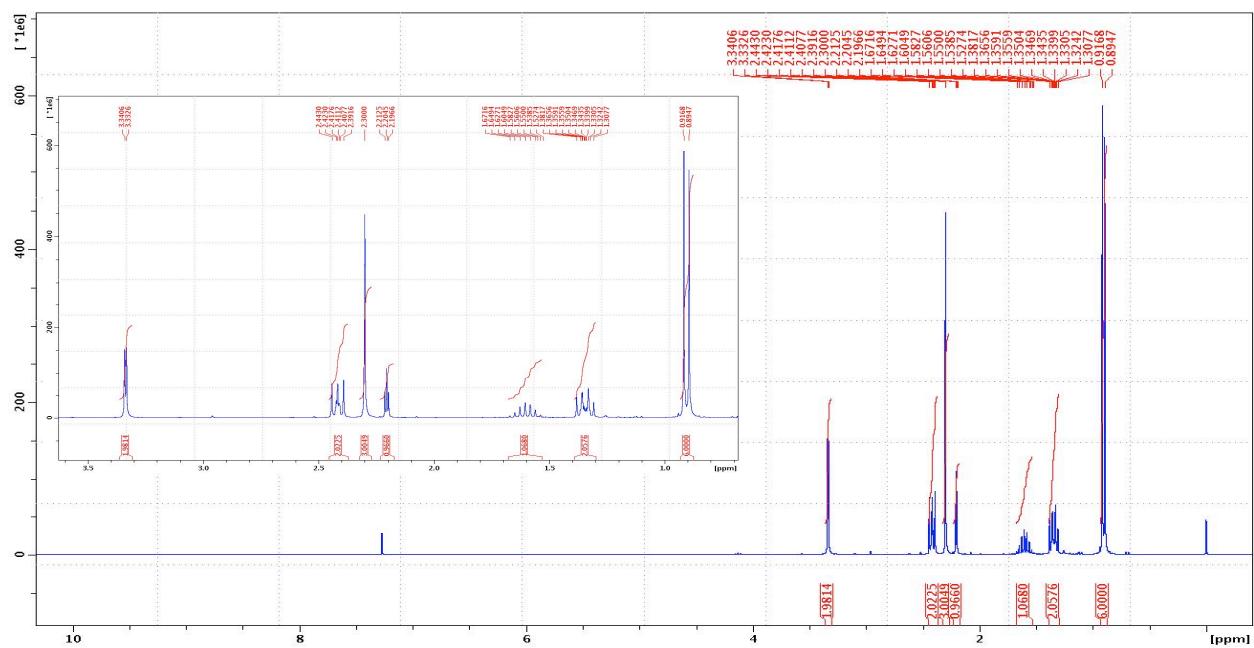

**N,3-dimethyl-N-(prop-2-ynyl)butan-1-amine 4{9}. <sup>13</sup>C NMR**

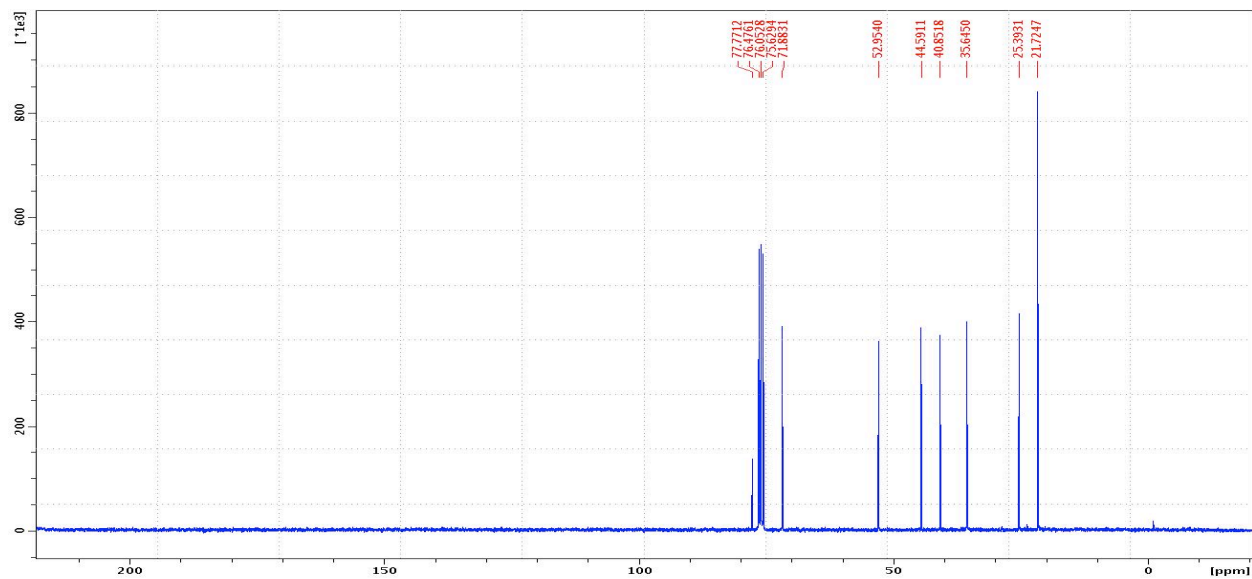

**1,4-disubstituted 1,2,3-triazole library**

**2-hydroxy-3-(4-((methyl(3-phenylpropyl)amino)methyl)-1H-1,2,3-triazol-1-yl)propyl benzylcarbamate 2{4,2}. <sup>1</sup>H NMR**

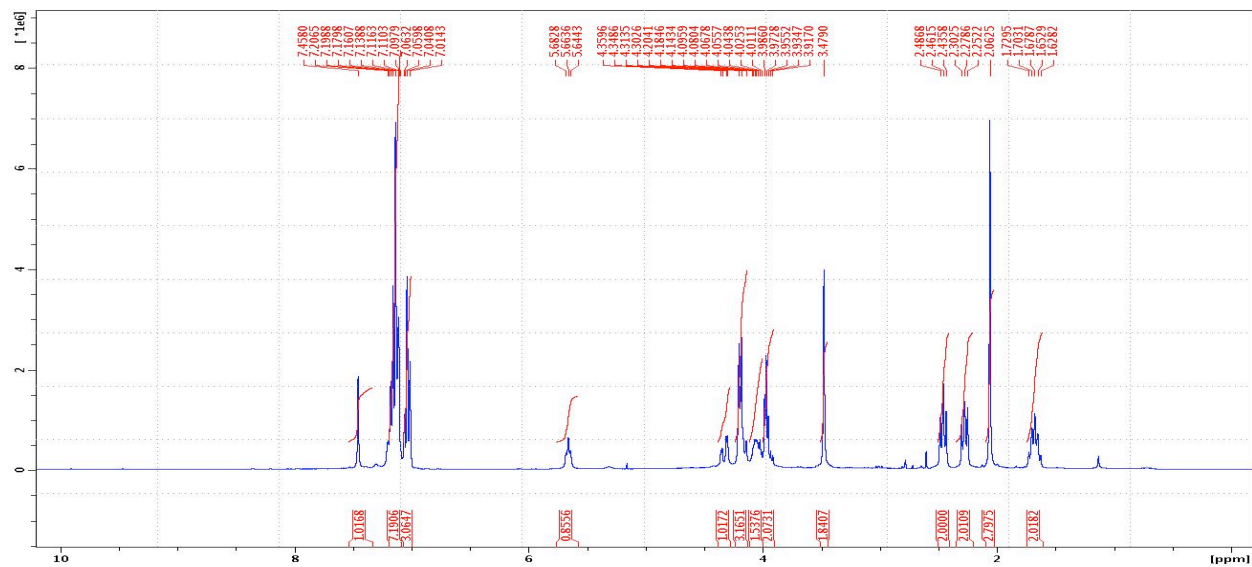

**2-(4-((4-phenylpiperazin-1-yl)methyl)-1H-1,2,3-triazol-1-yl)cyclohexanol 2{9,6}. <sup>1</sup>H NMR**

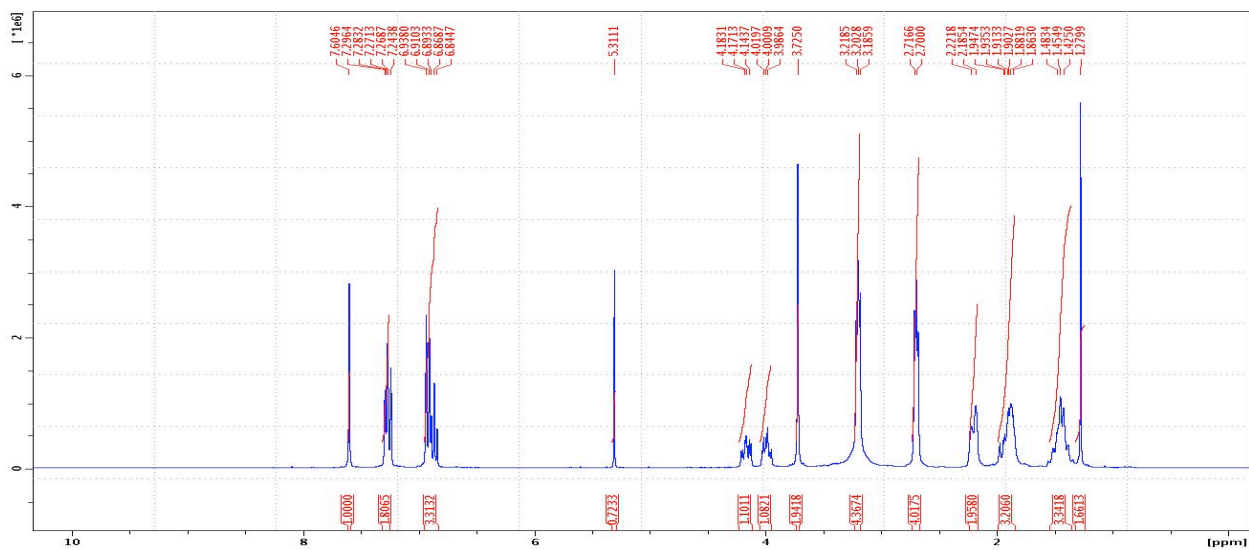

**Ethyl 1-((1-(2-hydroxyhexyl)-1H-1,2,3-triazol-4-yl)methyl)piperidine-3-carboxylate 2{7,7}. <sup>1</sup>H NMR**

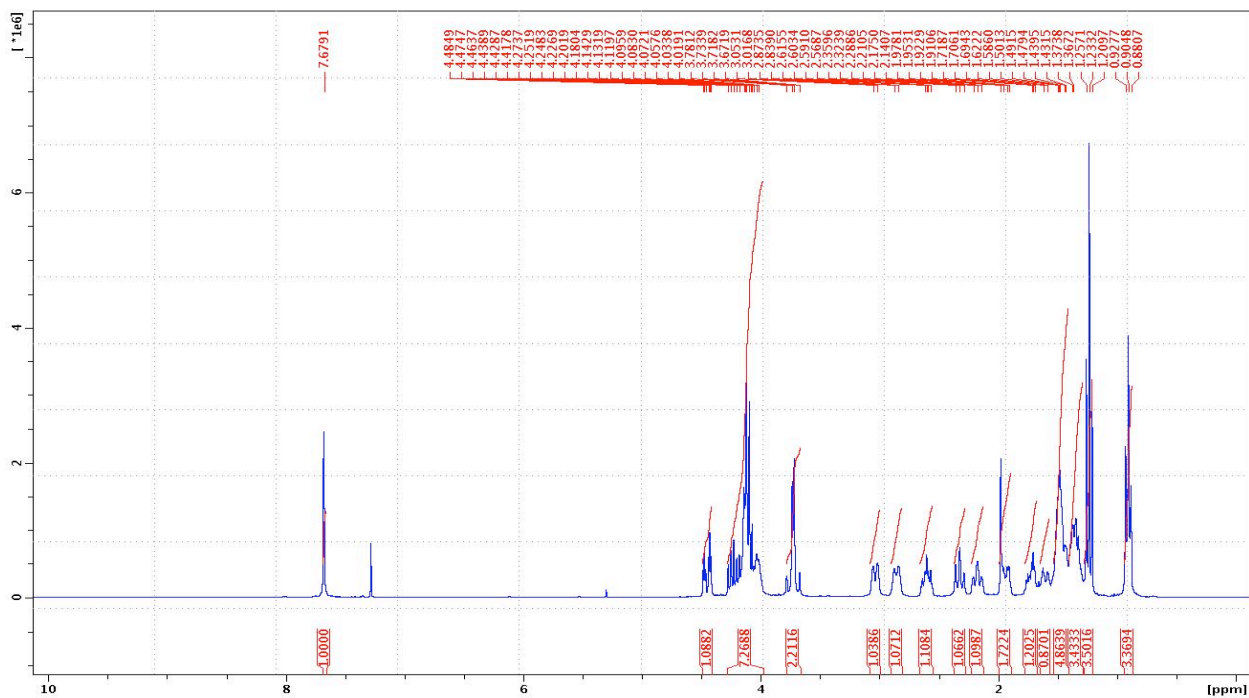



**1-(4-(((cyclohexylmethyl)(methyl)amino)methyl)-1H-1,2,3-triazol-1-yl)hexan-2-ol 2{7,8}. <sup>1</sup>H NMR**

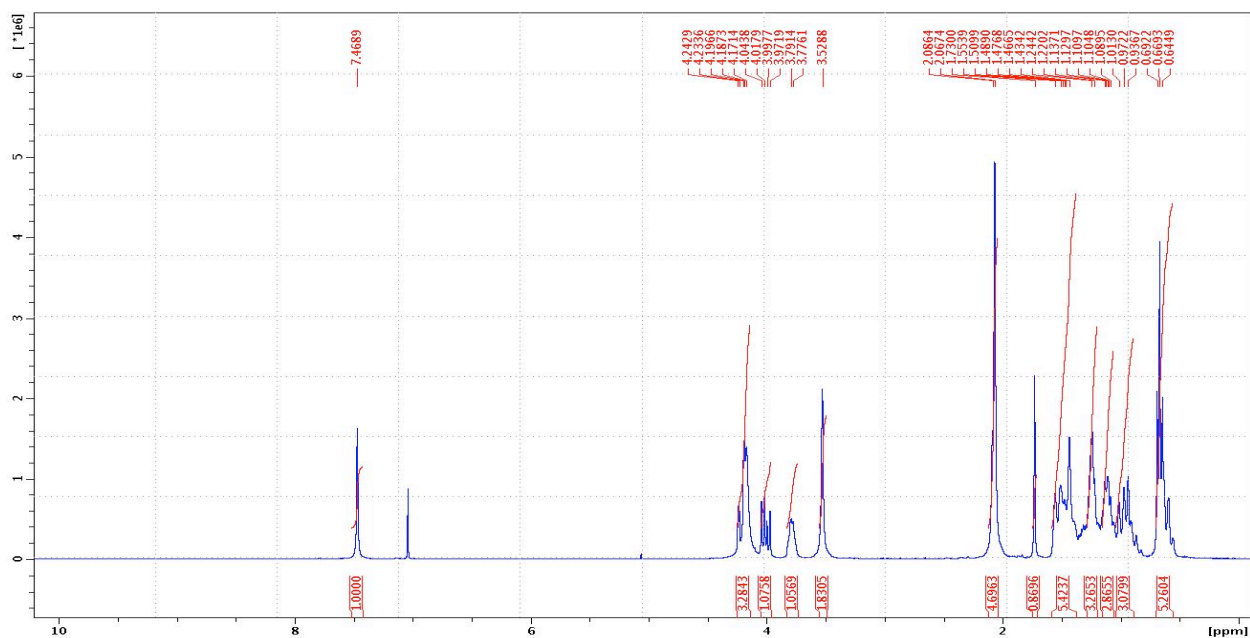

**1-(4-((4-phenylpiperazin-1-yl)methyl)-1H-1,2,3-triazol-1-yl)hexan-2-ol 2{7,6}. <sup>1</sup>H NMR**

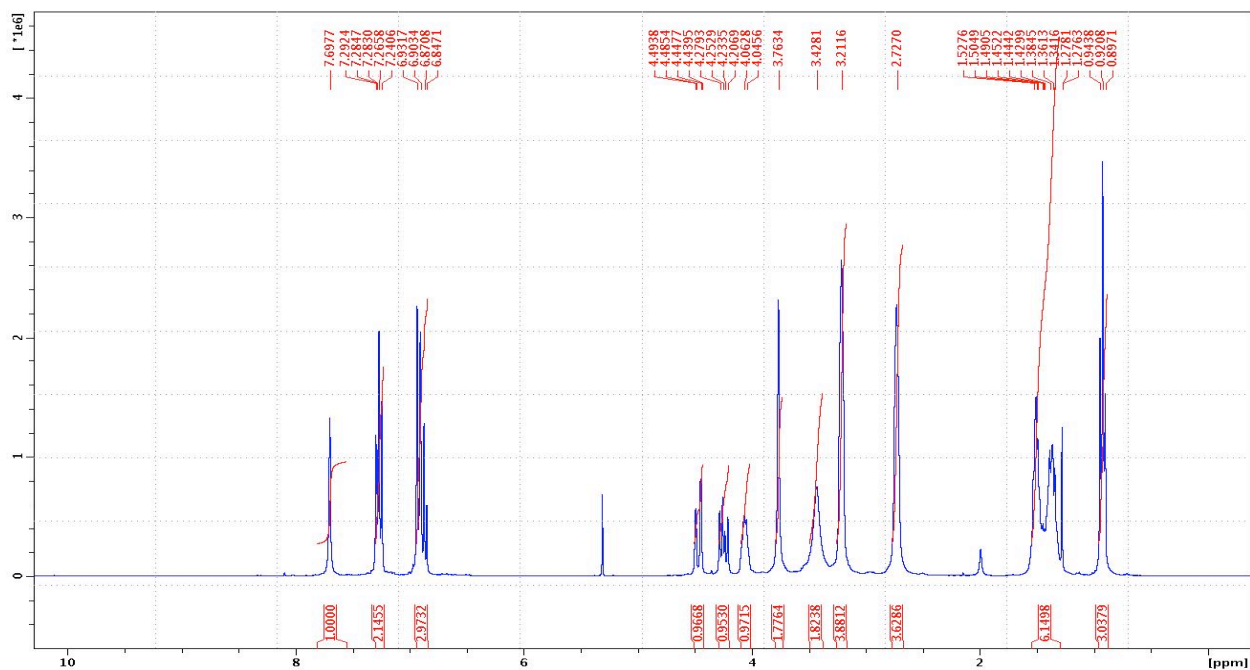

**Ethyl 1-(((1-(2-hydroxycyclohexyl)-1H-1,2,3-triazol-4-yl)methyl)piperidine-3-carboxylate 2{9,7}. <sup>1</sup>H NMR**

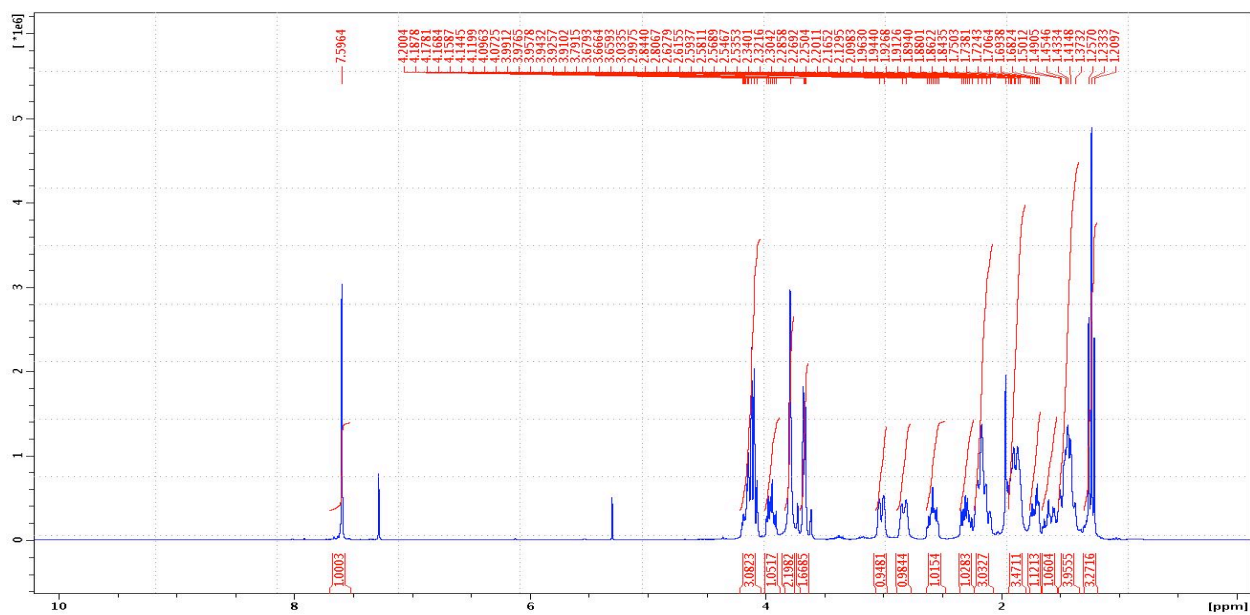

**2-(4-(((cyclohexylmethyl)(methyl)amino)methyl)-1H-1,2,3-triazol-1-yl)cyclohexanol 2{9,8}. <sup>1</sup>H NMR**

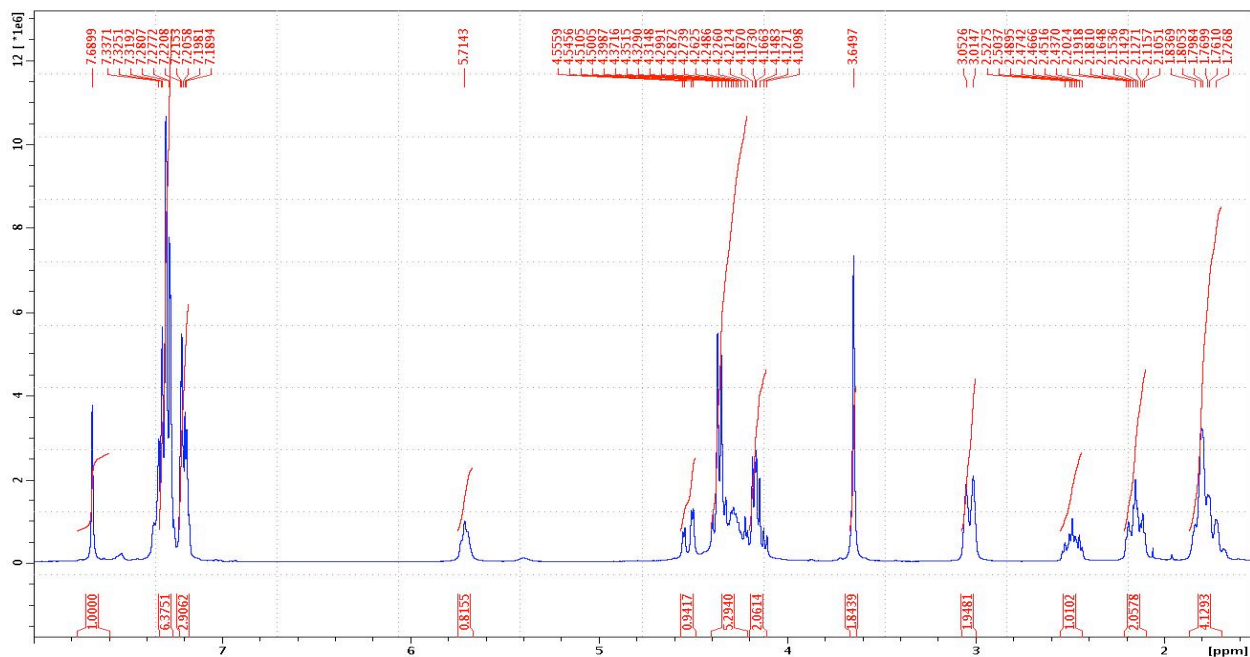

**Ethyl 1-((1-(3-(benzyloxy)-2-hydroxypropyl)-1H-1,2,3-triazol-4-yl)methyl)piperidine-3-carboxylate 2{8,7}. <sup>1</sup>H NMR**

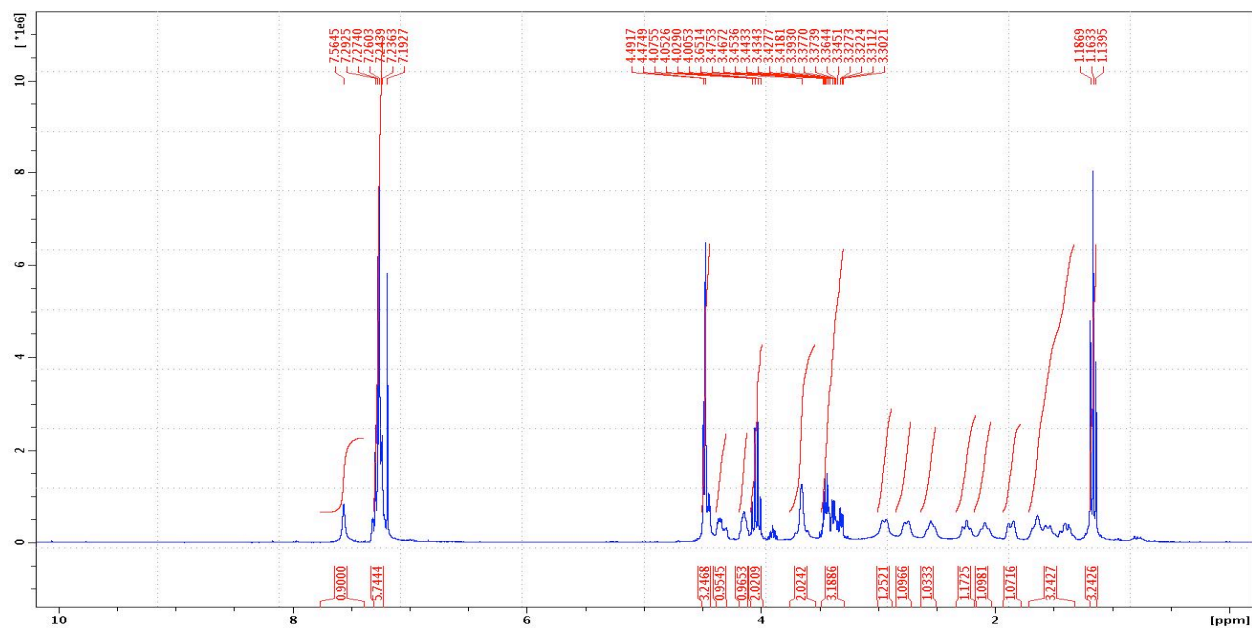

**3-(4-((dibutylamino)methyl)-1H-1,2,3-triazol-1-yl)-2-hydroxypropyl benzylcarbamate 2{4,1}. <sup>1</sup>H NMR**

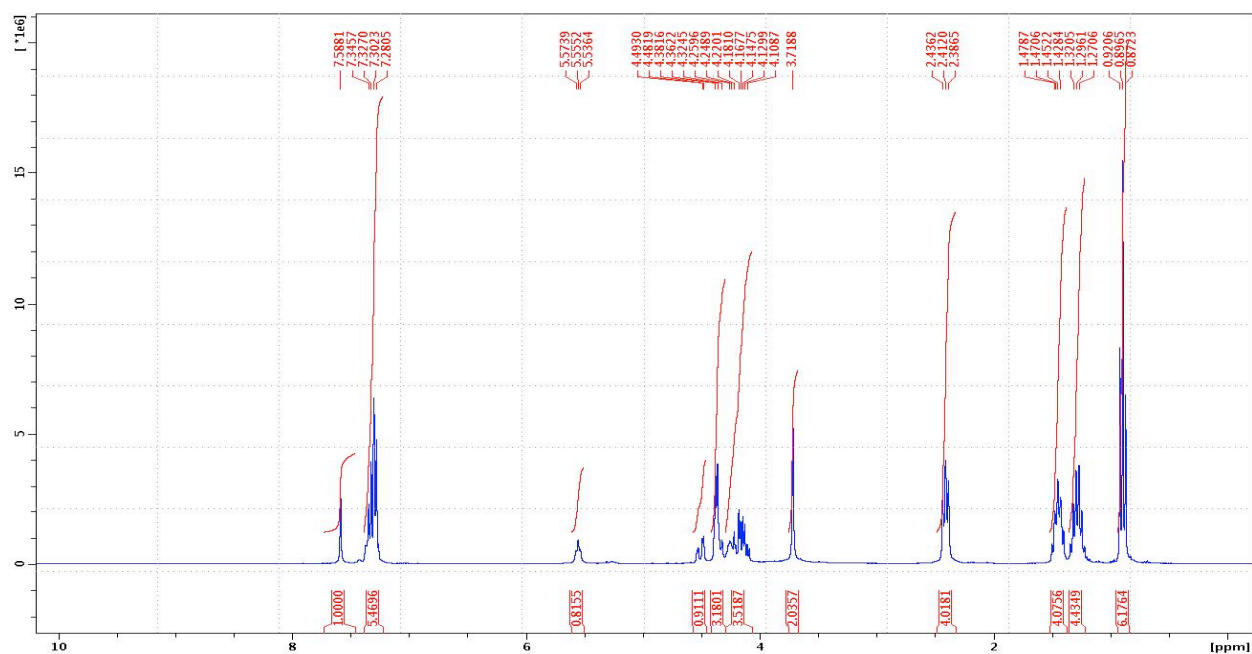

**Ethyl 1-((1-(3-(benzylcarbamoyloxy)-2-hydroxypropyl)-1H-1,2,3-triazol-4-yl)methyl)piperidine-3-carboxylate 2{4,7}. <sup>1</sup>H NMR**

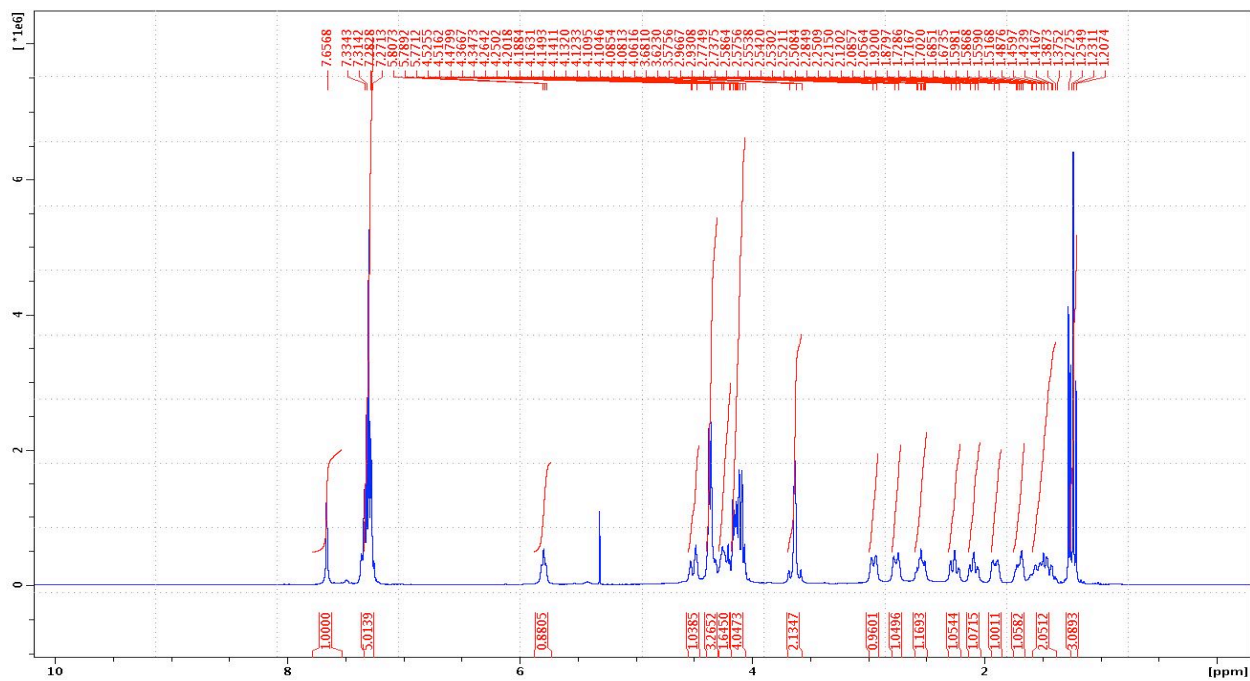

**2-hydroxy-3-(4-((isopentyl(methyl)amino)methyl)-1H-1,2,3-triazol-1-yl)propyl benzylcarbamate 2{4,9}. <sup>1</sup>H NMR**

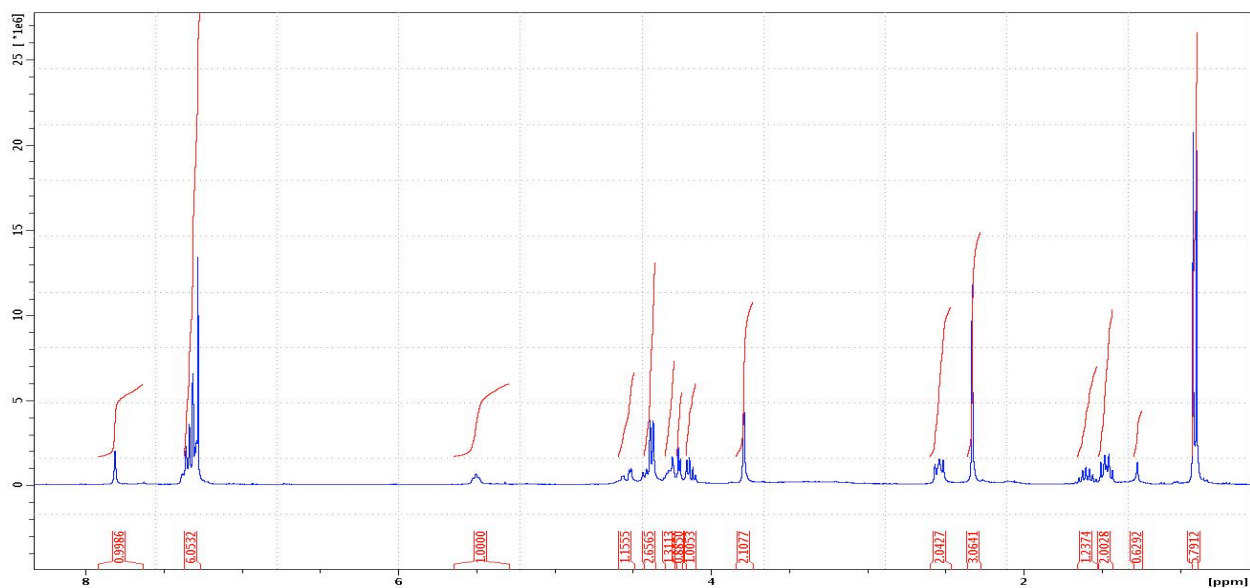

**3-(4(((cyclohexylmethyl)(methyl) amino)methyl)-1H-1,2,3-triazol-1-yl)-2-hydroxypropyl benzylcarbamate 2{4,8}. <sup>1</sup>H NMR**

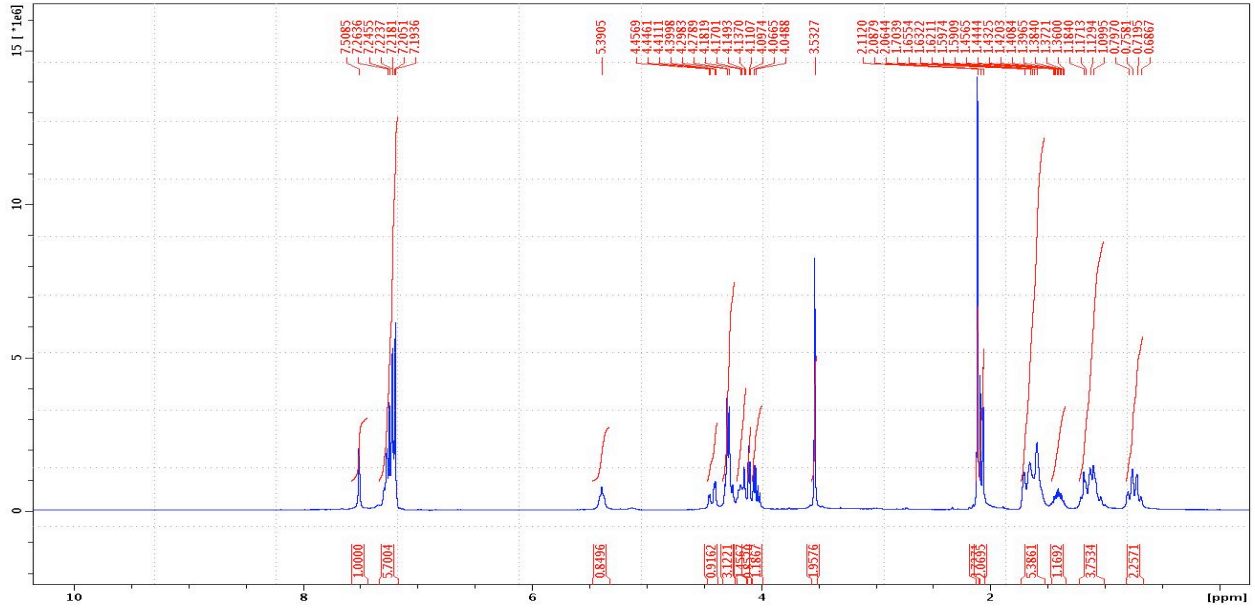

**2-(4((4-phenylpiperidin-1-yl)methyl)-1H-1,2,3-triazol-1-yl)cyclohexyl benzoate 2{10,5}. <sup>1</sup>H NMR**

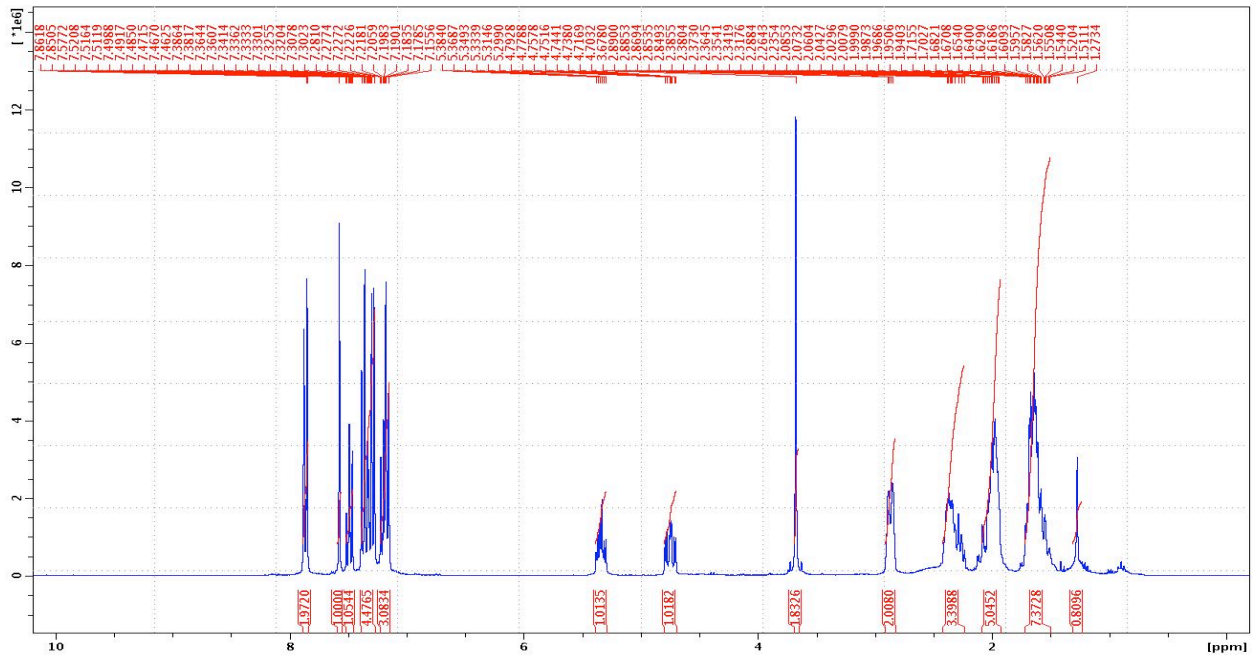

**2-(4(((cyclohexylmethyl)(methyl)amino)methyl)-1H-1,2,3-triazol-1-yl)cyclohexyl 2-phenoxyacetate 2{12,8}. <sup>1</sup>H NMR**

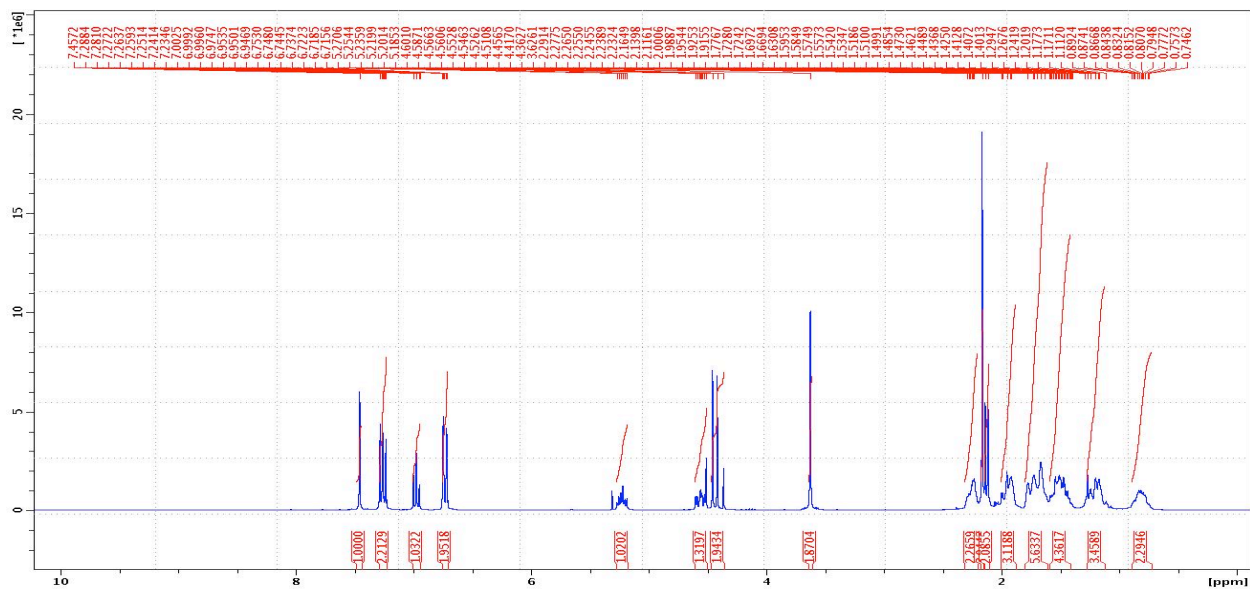

**2-(4((methyl(3-phenylpropyl)amino)methyl)-1H-1,2,3-triazol-1-yl)cyclohexyl 2-phenoxyacetate 2{12,2}. <sup>1</sup>H NMR**

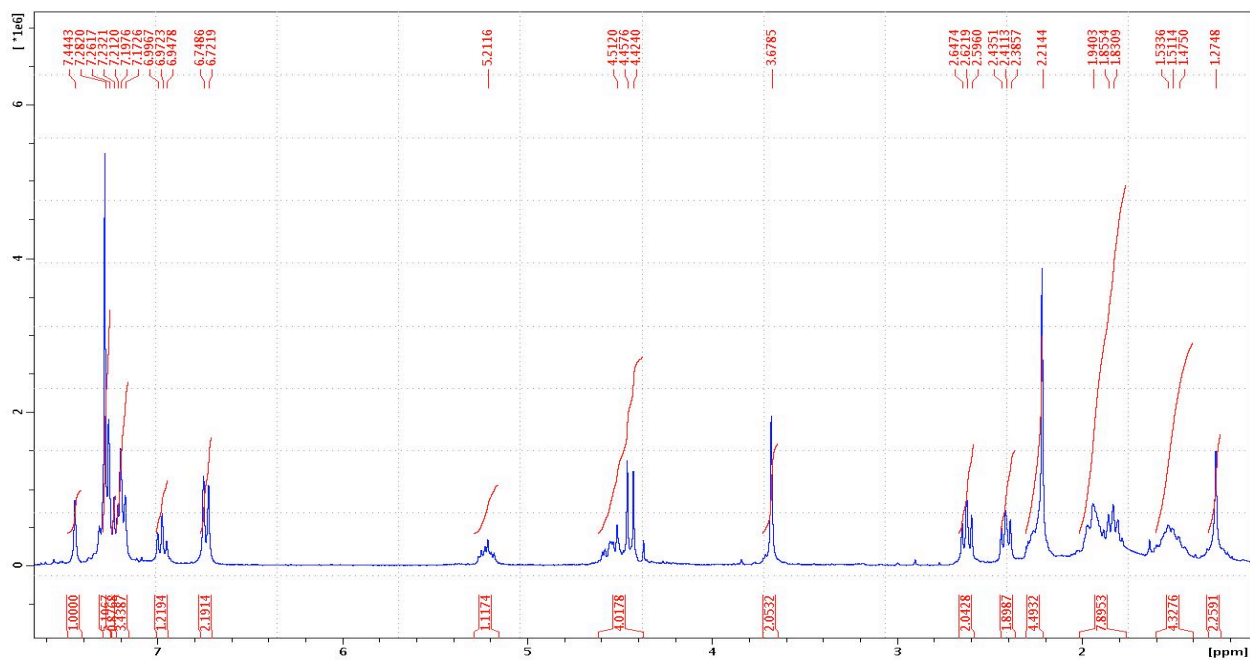

**2-(4-((4-phenylpiperidin-1-yl)methyl)-1H-1,2,3-triazol-1-yl)cyclohexyl 2-phenoxyacetate 2{12,5}. <sup>1</sup>H NMR**

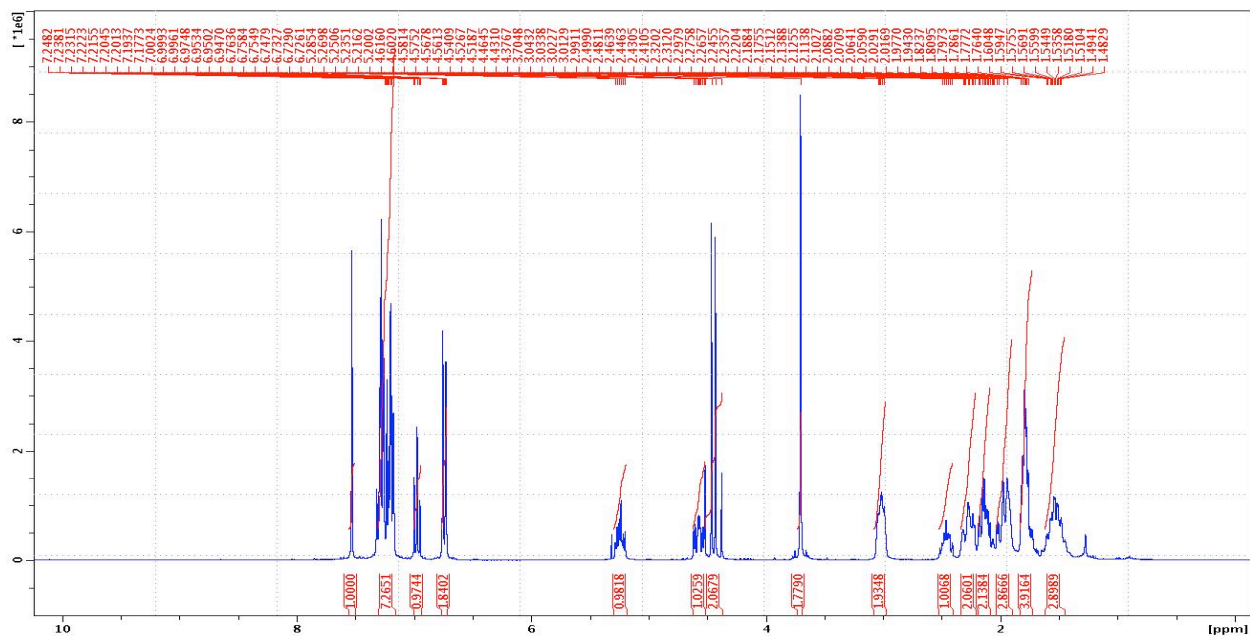

**2-(4-((dibutylamino)methyl)-1H-1,2,3-triazol-1-yl)cyclohexyl 2-phenoxyacetate 2{12,1}. <sup>1</sup>H NMR**

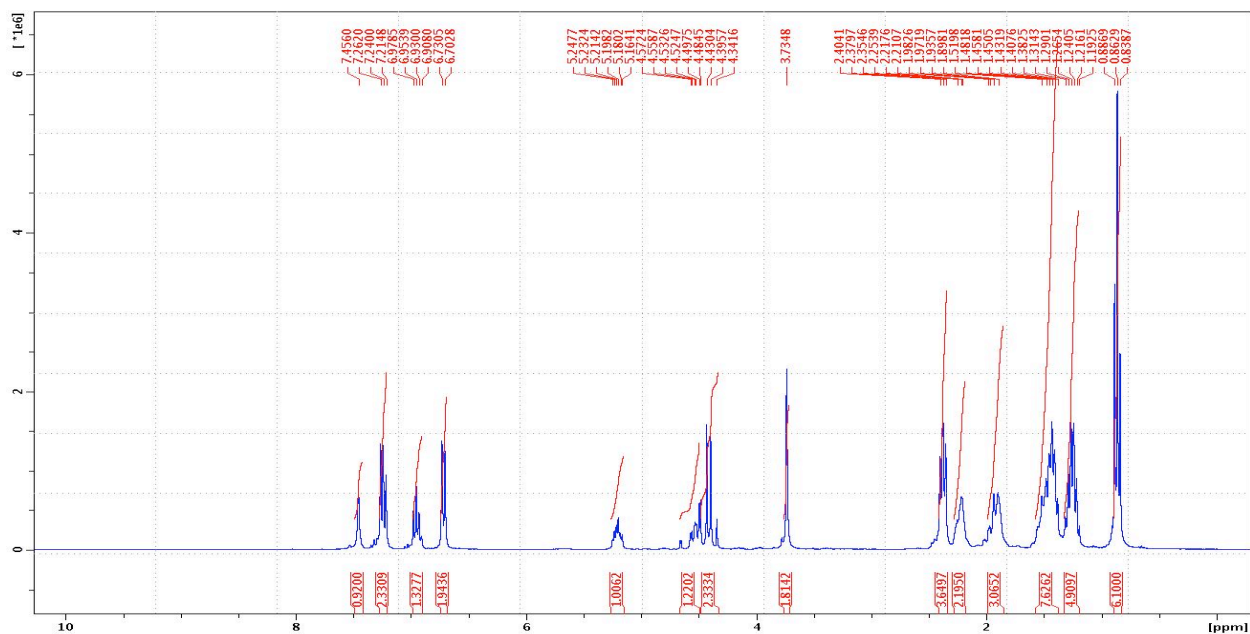

**Ethyl 1-((1-(2-(2-phenoxyacetoxy)cyclohexyl)-1H-1,2,3-triazol-4-yl)methyl)piperidine-3-carboxylate 2{12,7}. <sup>1</sup>H NMR**

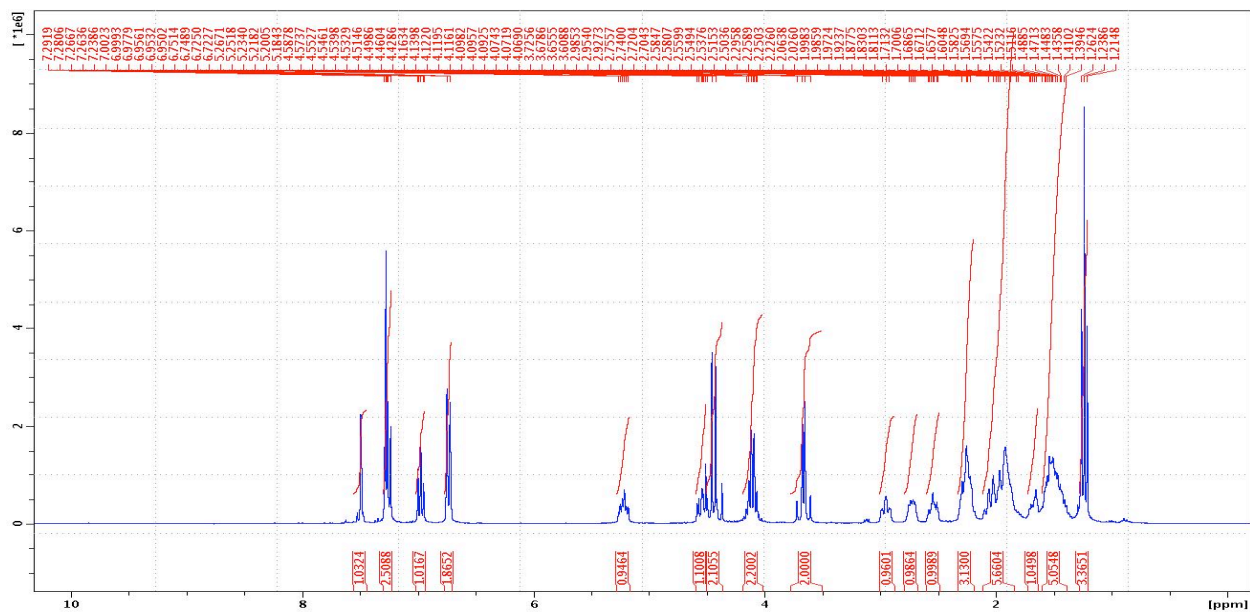

**2-(4-((dibutylamino)methyl)-1H-1,2,3-triazol-1-yl)cyclohexyl 2-phenylacetate 2{11,1}. <sup>1</sup>H NMR**

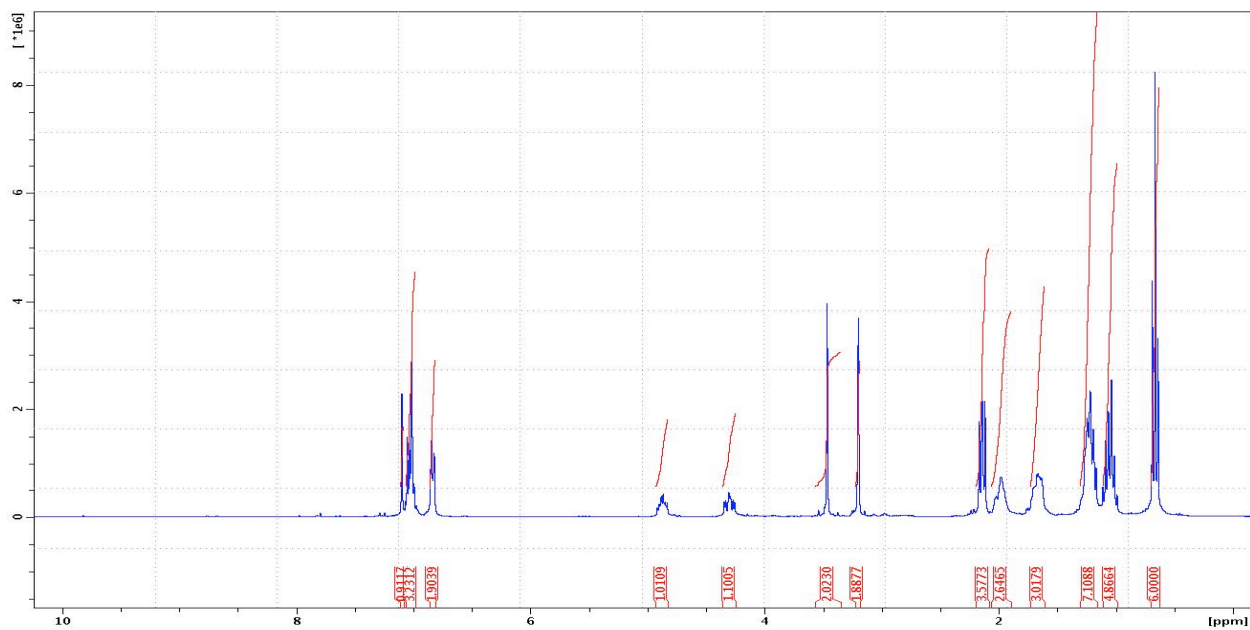



**2-(4-(((cyclohexylmethyl)(methyl)amino)methyl)-1H-1,2,3-triazol-1-yl)cyclohexyl 2-phenylacetate 2{11,8}. <sup>1</sup>H NMR**

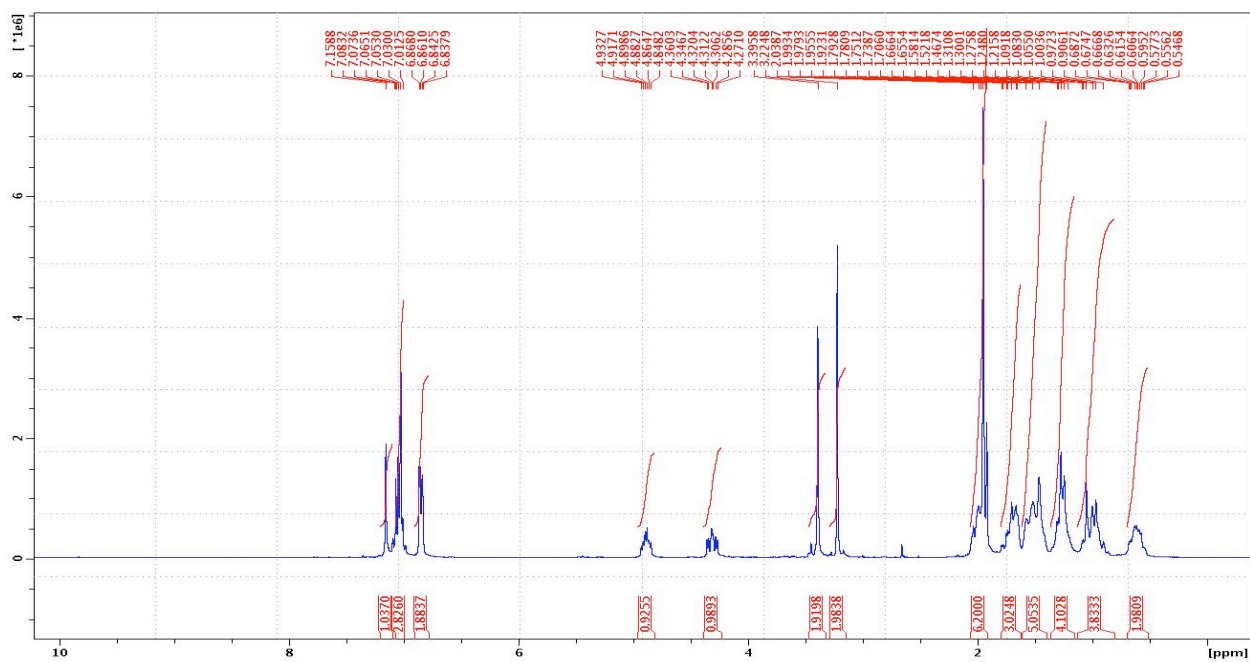

**2-hydroxy-3-(4-(((4-phenylpiperidin-1-yl)methyl)-1H-1,2,3-triazol-1-yl)propyl benzylcarbamate 2{4,5}. <sup>1</sup>H NMR**

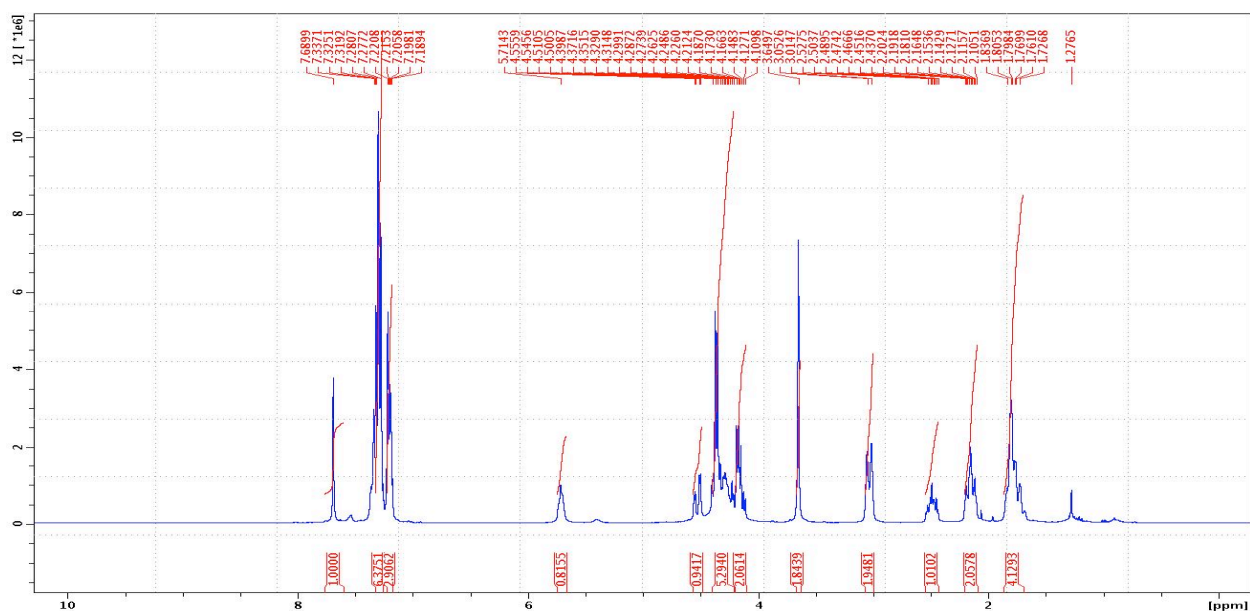

## HPLC chromatograms for 1,4-disubstituted 1,2,3-triazole library members

**1,4-disubstituted 1,2,3-triazole member 2{1,1}. HPLC (CH<sub>3</sub>OH : H<sub>2</sub>O) R<sub>T</sub> 17.05 (93%)**

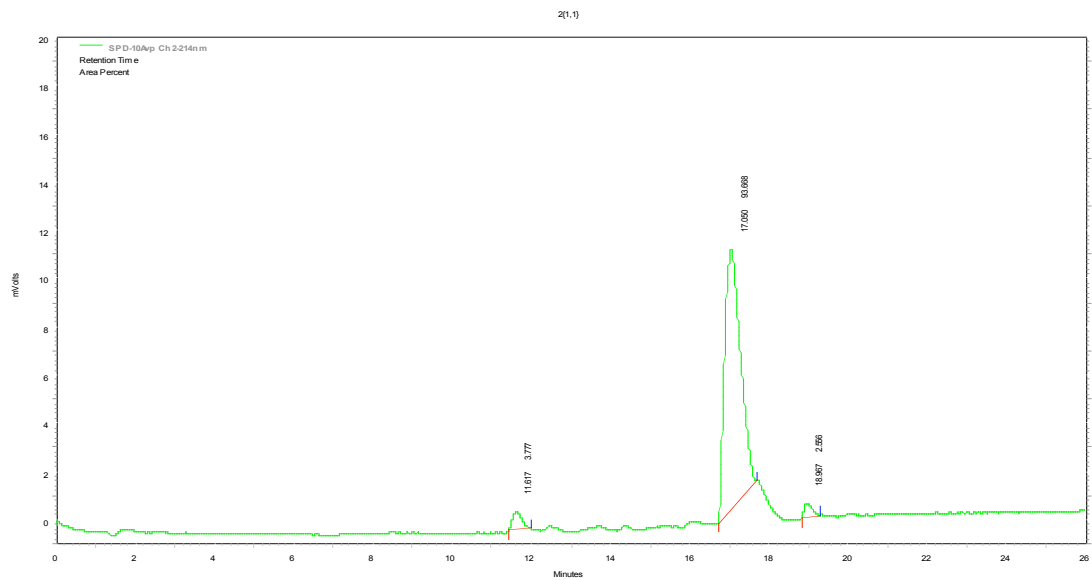

**1,4-disubstituted 1,2,3-triazole member 2{1,2}. HPLC (CH<sub>3</sub>OH : H<sub>2</sub>O) R<sub>T</sub> 4.97 (81%), gradient elution 55% to 95% over 9 min.**

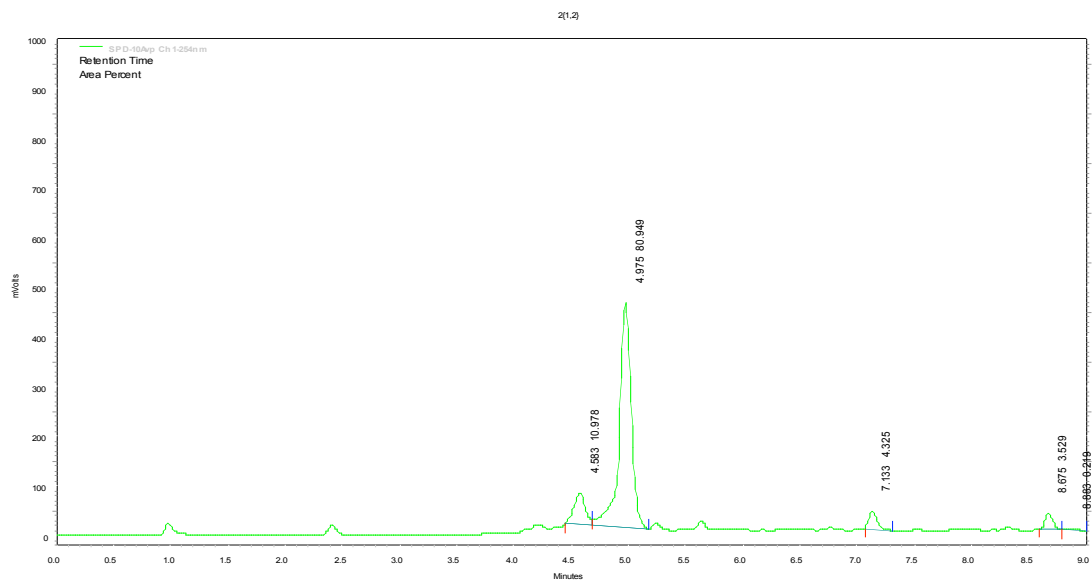

**1,4-disubstituted 1,2,3-triazole member 2{1,3}**. HPLC (CH<sub>3</sub>OH : H<sub>2</sub>O) R<sub>T</sub> 19.11 (91%), gradient elution 55% to 95% over 26 min.

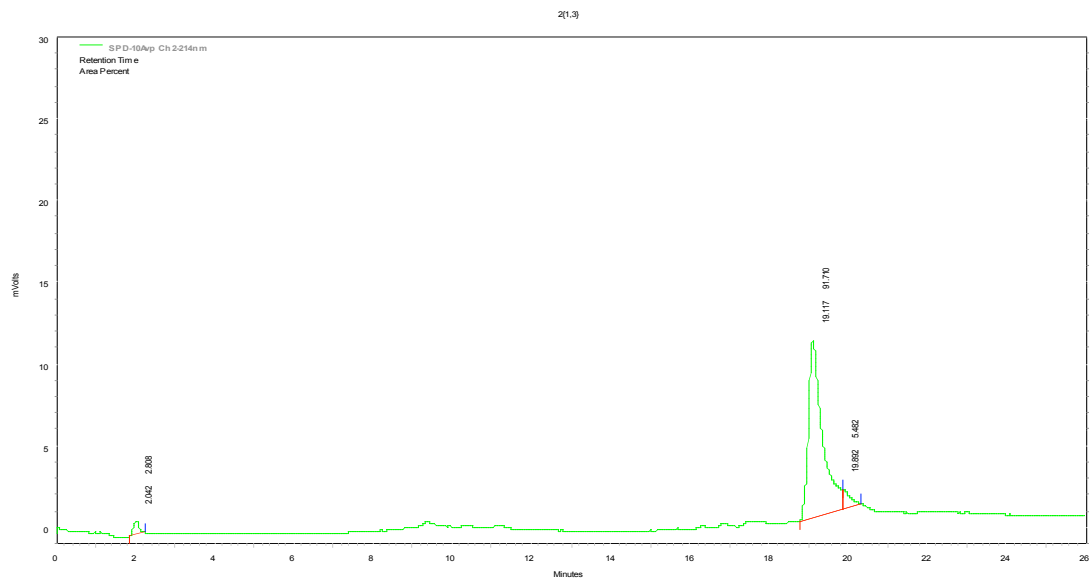

**1,4-disubstituted 1,2,3-triazole member 2{1,4}**. HPLC (CH<sub>3</sub>OH : H<sub>2</sub>O) R<sub>T</sub> 15.34 (87%), gradient elution 55% to 95% over 21 min.

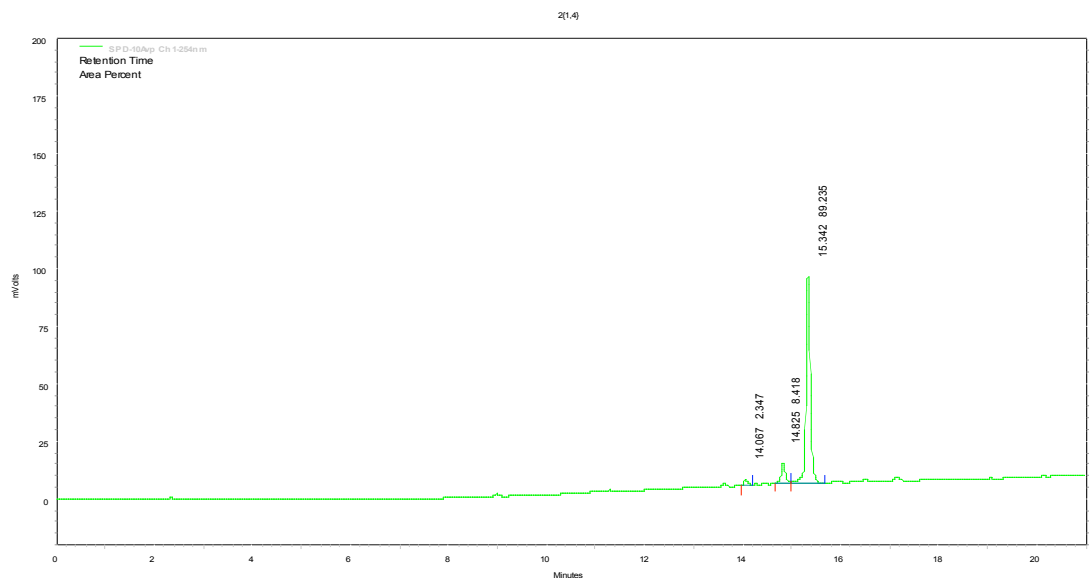

**1,4-disubstituted 1,2,3-triazole member 2{1,5}. HPLC (CH<sub>3</sub>OH : H<sub>2</sub>O) R<sub>T</sub> 19.20 (100%).**

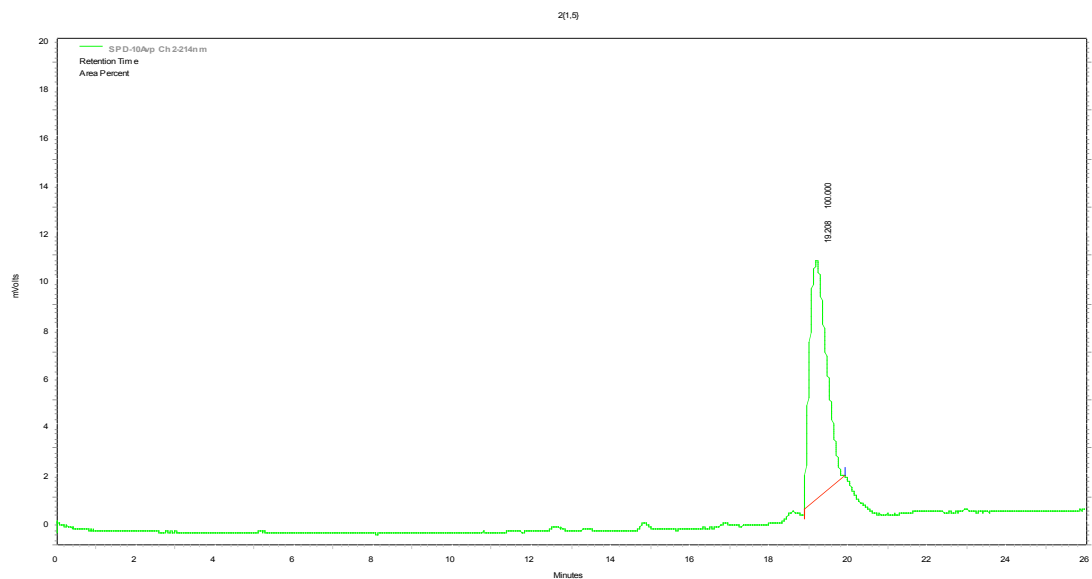

**1,4-disubstituted 1,2,3-triazole member 2{1,6}. HPLC (CH<sub>3</sub>OH : H<sub>2</sub>O) R<sub>T</sub> 16.94 (98%).**

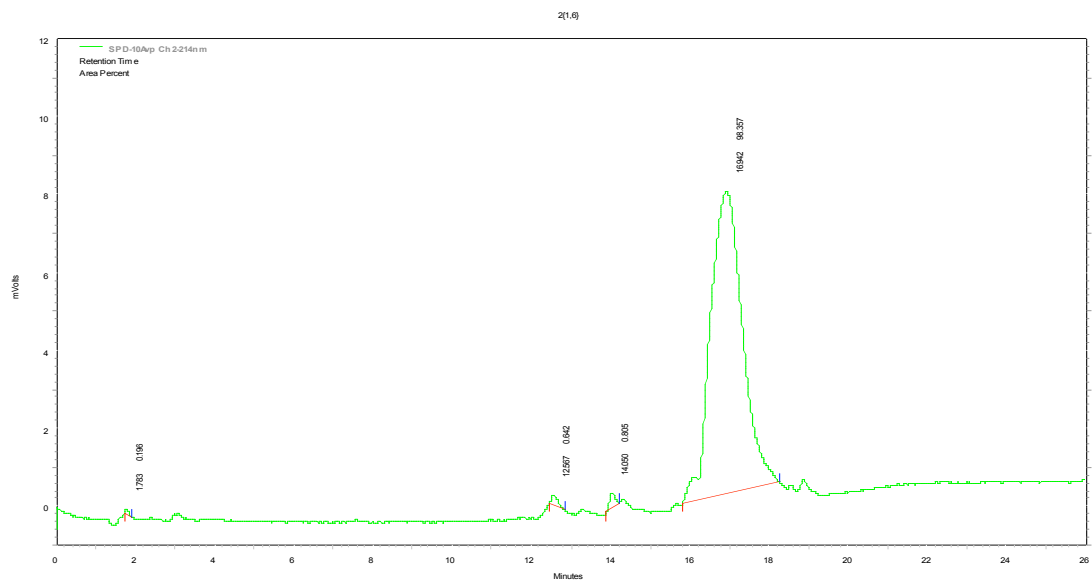

**1,4-disubstituted 1,2,3-triazole member 2{1,7}**. HPLC (CH<sub>3</sub>OH : H<sub>2</sub>O) R<sub>T</sub> 16.84 (97%), gradient elution 55% to 95% over 21 min.

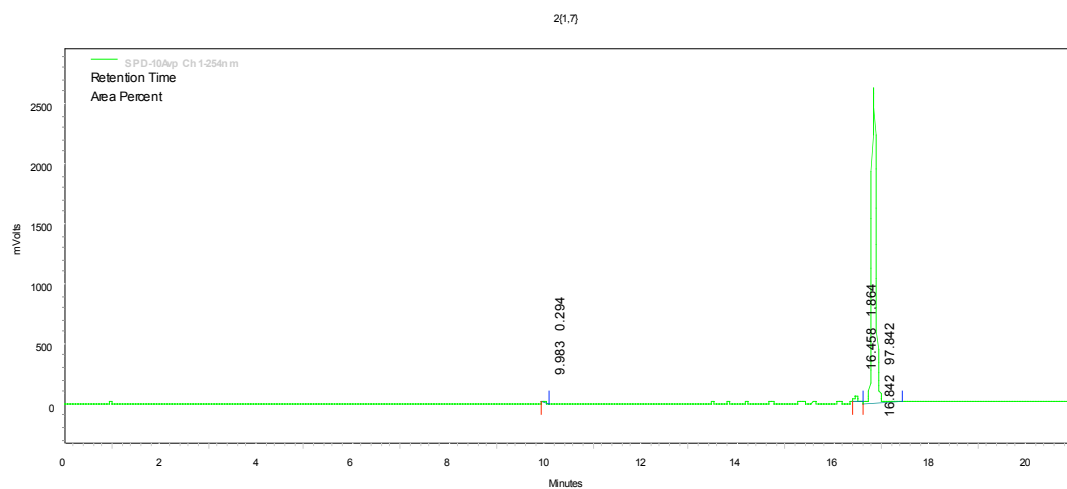

**1,4-disubstituted 1,2,3-triazole member 2{1,8}**. HPLC (CH<sub>3</sub>OH : H<sub>2</sub>O) R<sub>T</sub> 19.92 (95%).

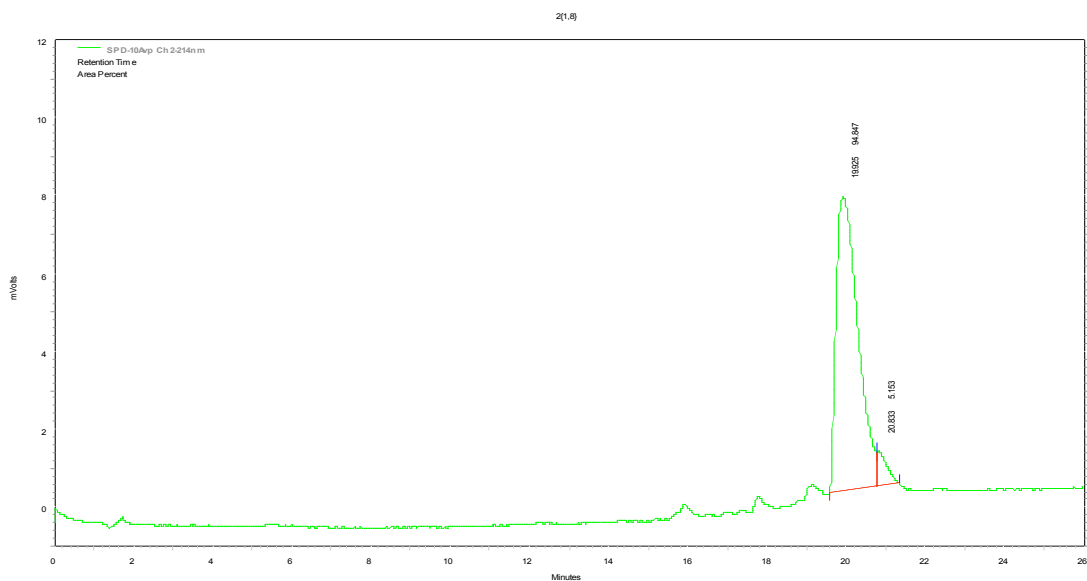

**1,4-disubstituted 1,2,3-triazole member 2{1,9}. HPLC (CH<sub>3</sub>OH : H<sub>2</sub>O) R<sub>T</sub> 17.57 (84%).**

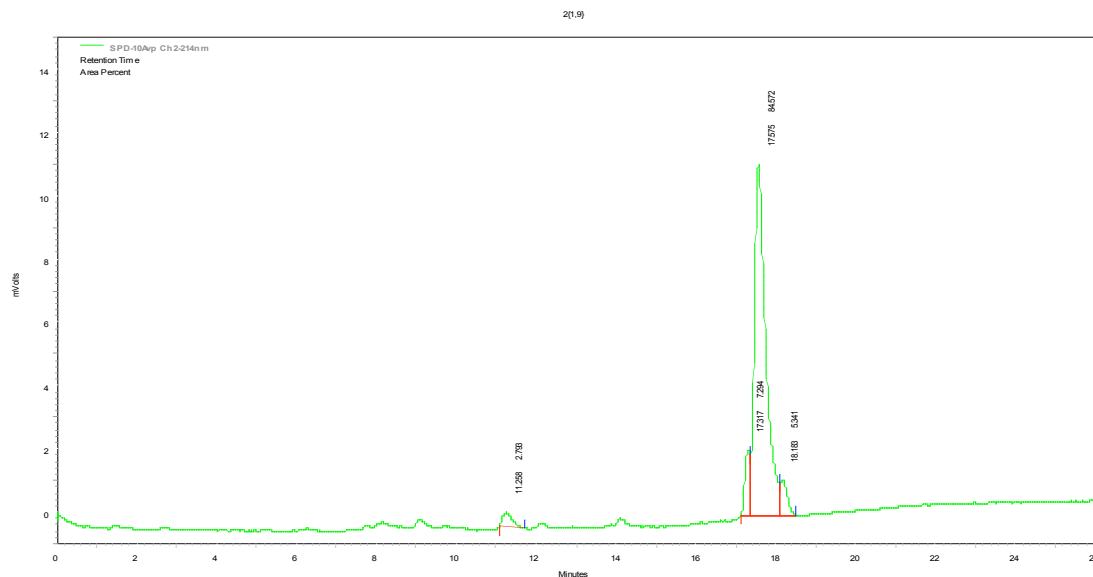

**1,4-disubstituted 1,2,3-triazole member 2{2,1}. HPLC (1% AcOH in CH<sub>3</sub>OH : H<sub>2</sub>O) R<sub>T</sub> 13.95 (100%), gradient elution 55% to 95% over 21 min.**

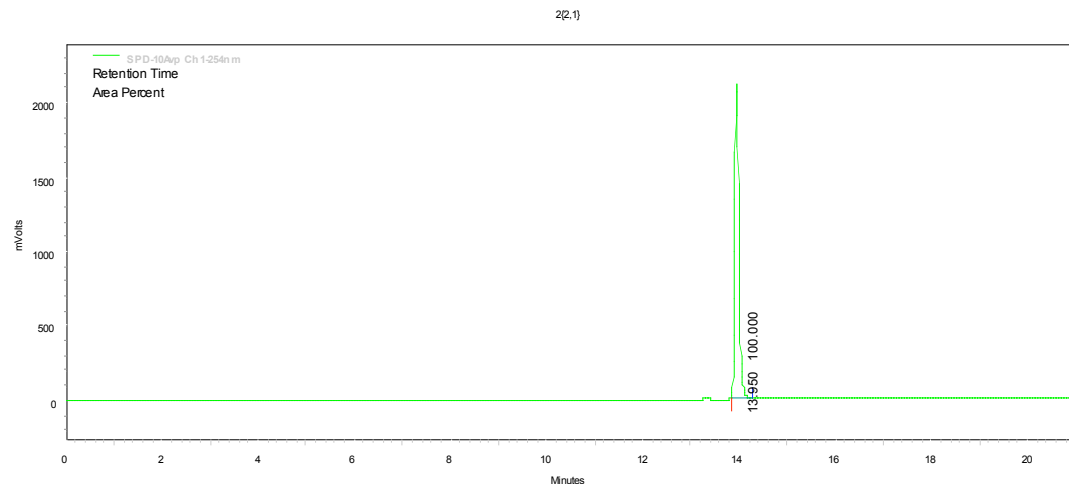

**1,4-disubstituted 1,2,3-triazole member 2{2,2}**. HPLC (CH<sub>3</sub>OH : H<sub>2</sub>O) R<sub>T</sub> 13.31 (83%), gradient elution 55% to 95% over 21 min.

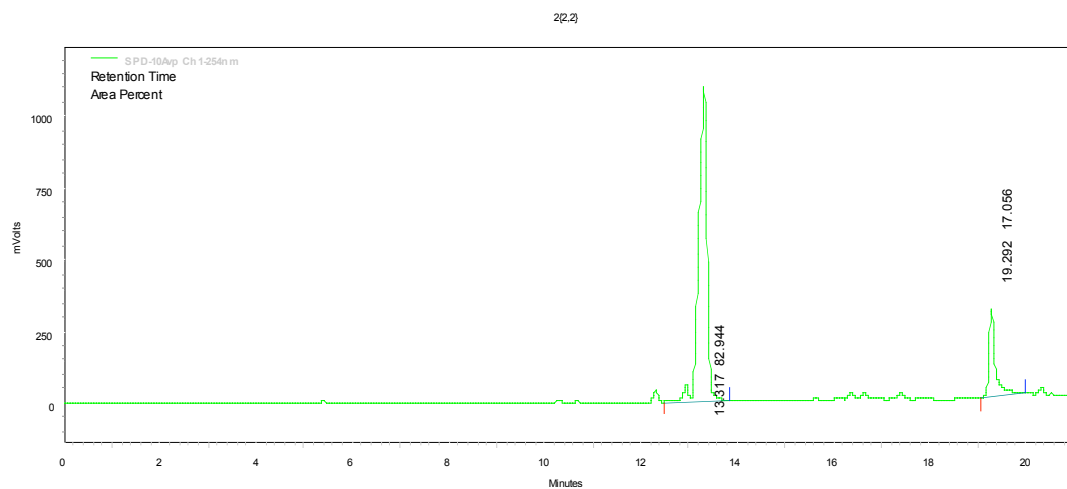

**1,4-disubstituted 1,2,3-triazole member 2{2,3}**. HPLC (1% AcOH in CH<sub>3</sub>OH : H<sub>2</sub>O) R<sub>T</sub> 2.40 (93%), gradient elution 30% to 90% over 26 min.

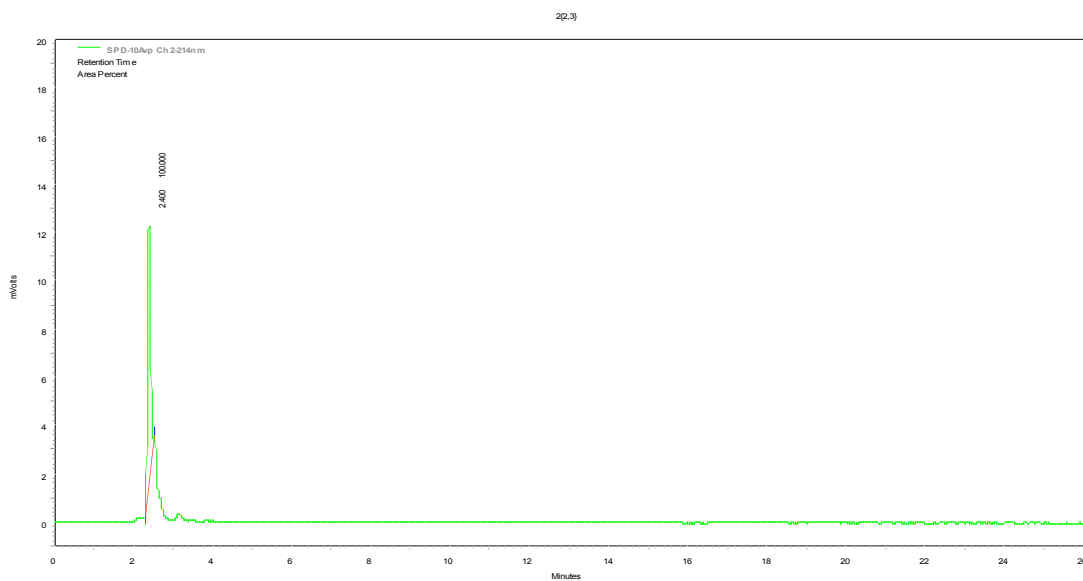

**1,4-disubstituted 1,2,3-triazole member 2{2,4}**. HPLC (CH<sub>3</sub>OH : H<sub>2</sub>O) R<sub>T</sub> 10.20 (81%), gradient elution 55% to 95% over 21 min.

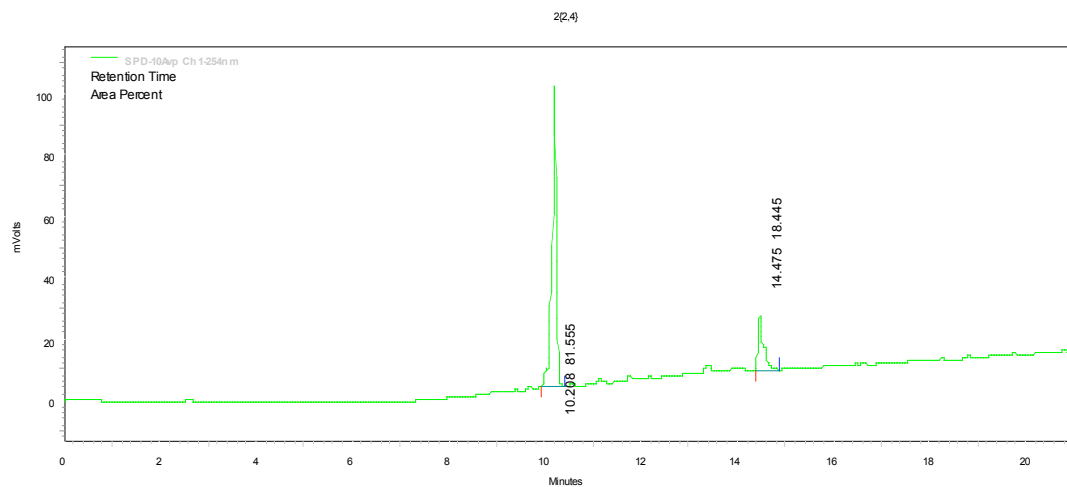

**1,4-disubstituted 1,2,3-triazole member 2{2,5}**. HPLC (CH<sub>3</sub>OH : H<sub>2</sub>O) R<sub>T</sub> 10.02 (84%), gradient elution 55% to 95% over 21 min.

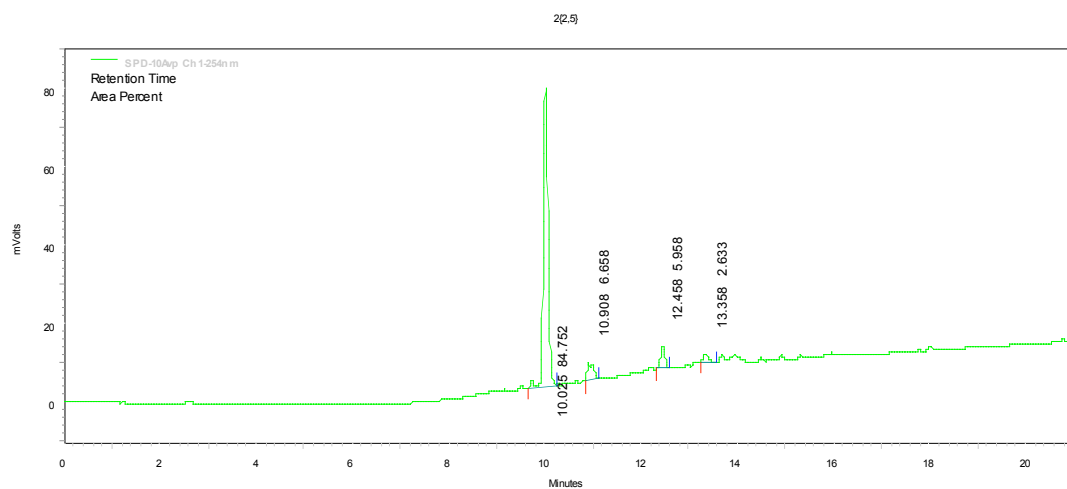



**1,4-disubstituted 1,2,3-triazole member 2{2,6}**. HPLC (CH<sub>3</sub>OH : H<sub>2</sub>O) R<sub>T</sub> 10.37 (81%), gradient elution 55% to 95% over 21 min.

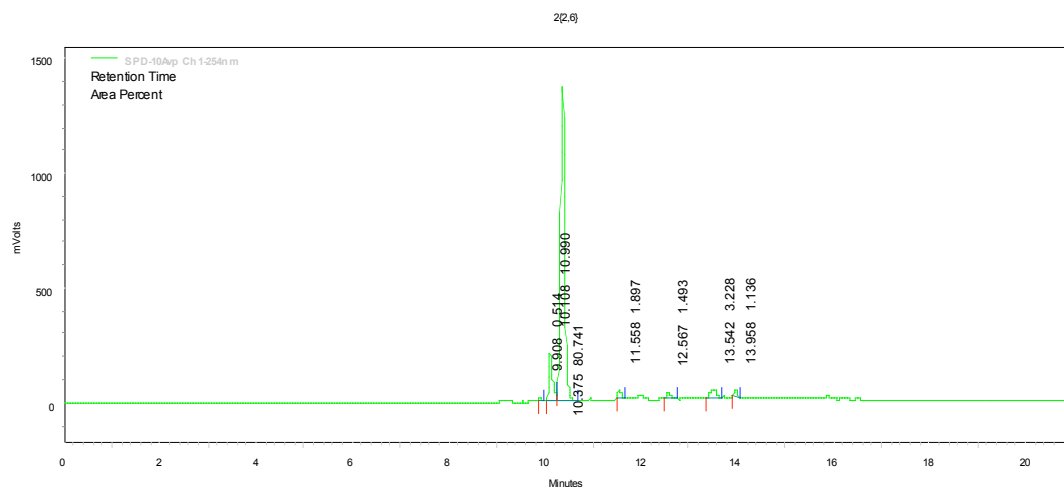

**1,4-disubstituted 1,2,3-triazole member 2{2,7}**. HPLC (CH<sub>3</sub>OH : H<sub>2</sub>O) R<sub>T</sub> 11.84 (84%), gradient elution 55% to 95% over 21 min.

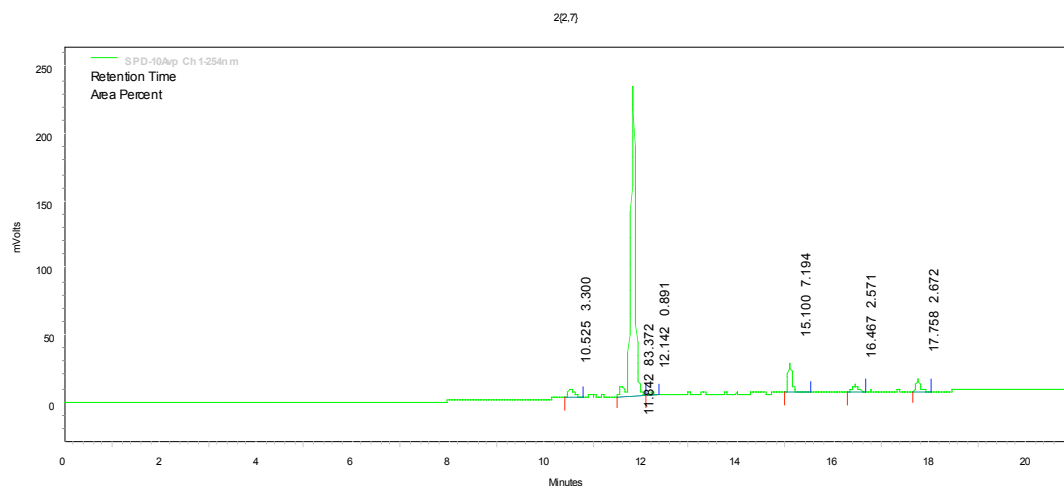

**1,4-disubstituted 1,2,3-triazole member 2{2,8}**. HPLC (1% AcOH in CH<sub>3</sub>OH : H<sub>2</sub>O) R<sub>T</sub> 2.53 (82%), gradient elution 30% to 90% over 21 min.

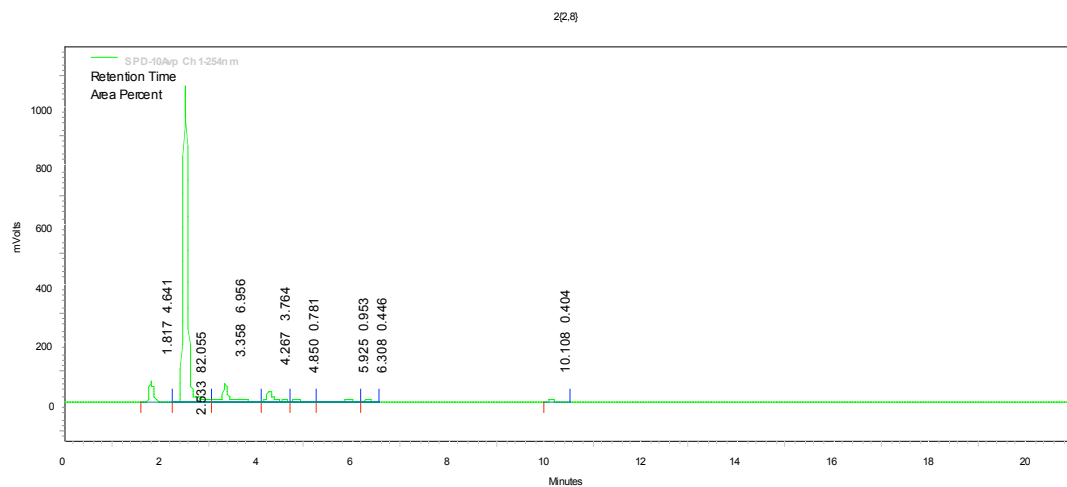

**1,4-disubstituted 1,2,3-triazole member 2{2,9}**. HPLC (CH<sub>3</sub>OH : H<sub>2</sub>O) R<sub>T</sub> 9.69 (84%), gradient elution 55% to 95% over 21 min.

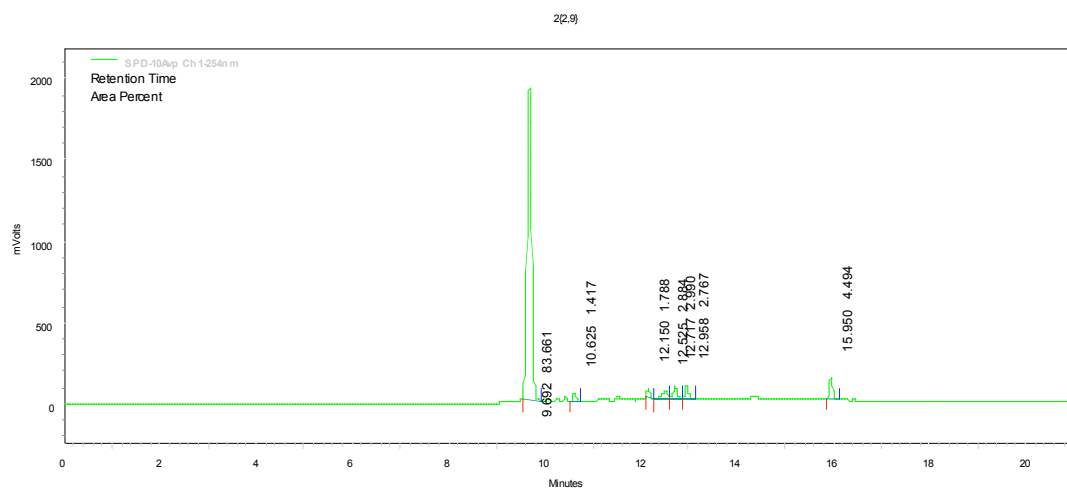

**1,4-disubstituted 1,2,3-triazole member 2{3,1}**. HPLC (CH<sub>3</sub>OH : H<sub>2</sub>O) R<sub>T</sub> 14.13 (83%), gradient elution 55% to 95% over 21 min.

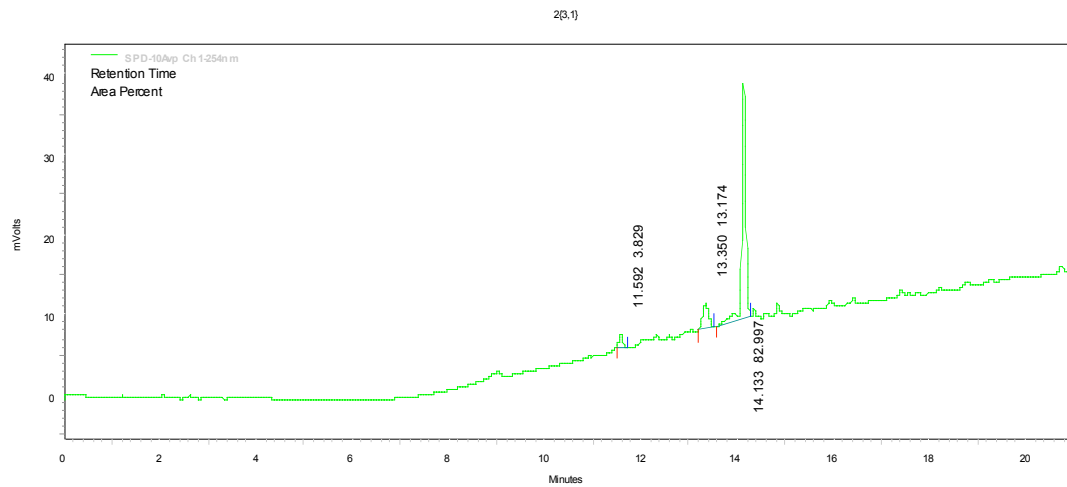

**1,4-disubstituted 1,2,3-triazole member 2{3,2}**. HPLC (1% AcOH in CH<sub>3</sub>OH : H<sub>2</sub>O) R<sub>T</sub> 4.30 (100%), gradient elution 30% to 90% over 26 min.

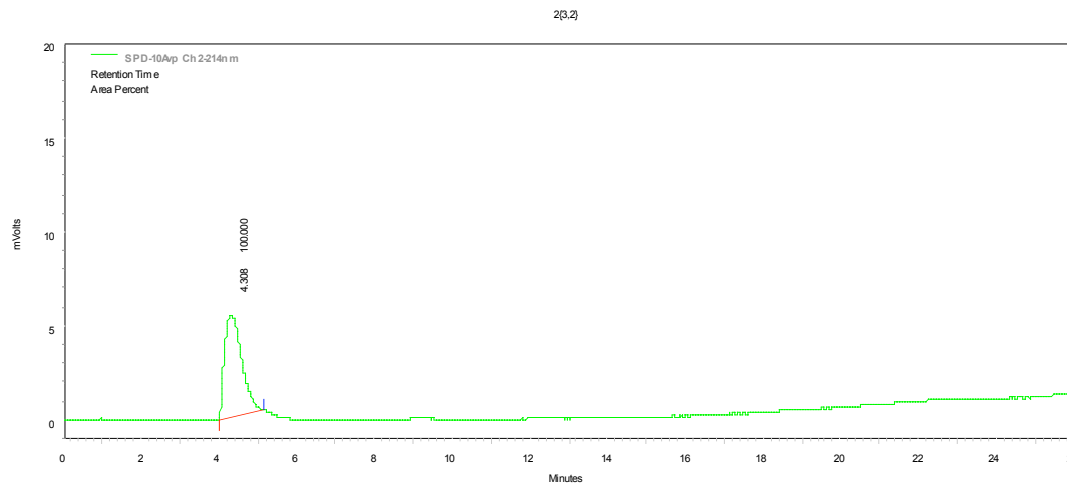

**1,4-disubstituted 1,2,3-triazole member 2{3,3}**. HPLC (1% AcOH in CH<sub>3</sub>OH : H<sub>2</sub>O) R<sub>T</sub> 2.45 (100%), gradient elution 30% to 90% over 26 min.

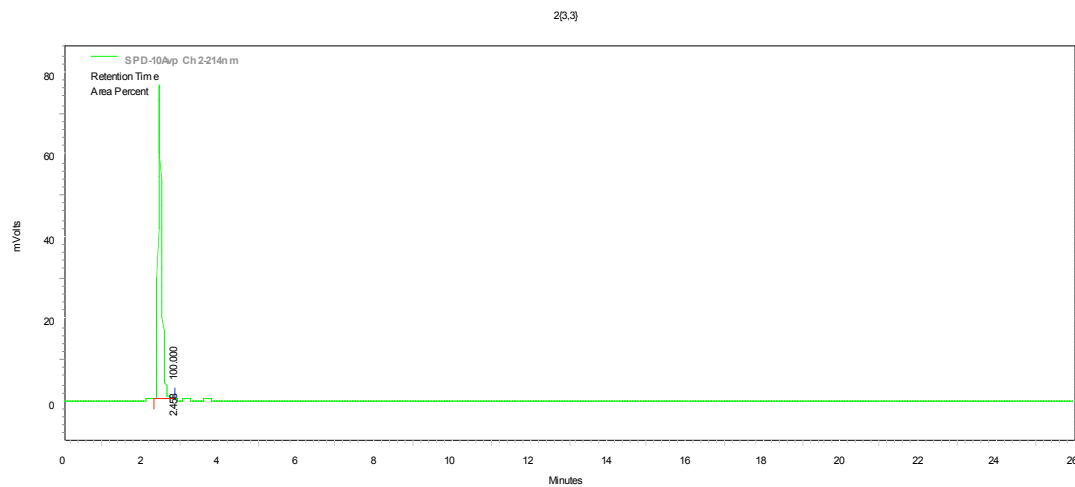

**1,4-disubstituted 1,2,3-triazole member 2{3,4}**. HPLC (1% AcOH in CH<sub>3</sub>OH : H<sub>2</sub>O) R<sub>T</sub> 5.09 (86%), gradient elution 30% to 90% over 20 min.

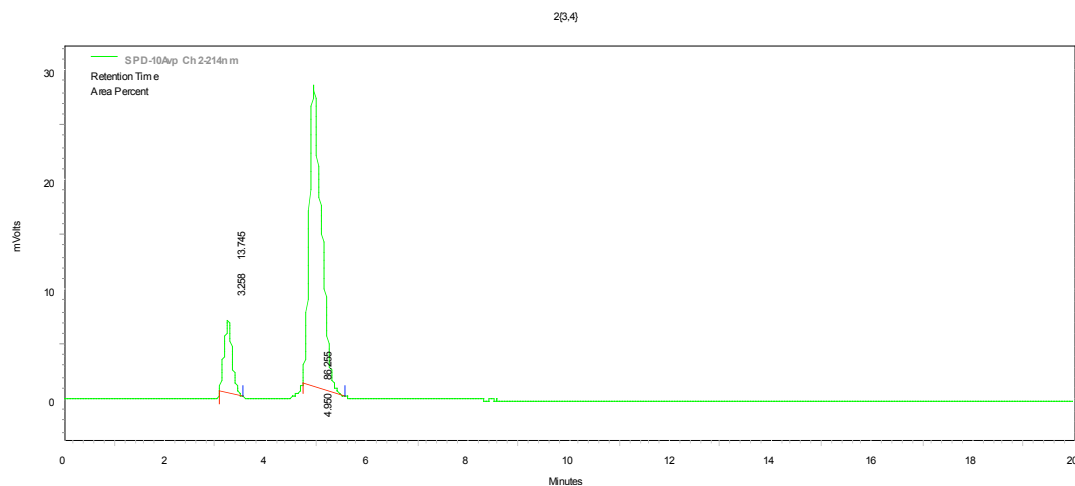

**1,4-disubstituted 1,2,3-triazole member 2{3,5}. HPLC (CH<sub>3</sub>OH : H<sub>2</sub>O) R<sub>T</sub> 18.19 (90%).**

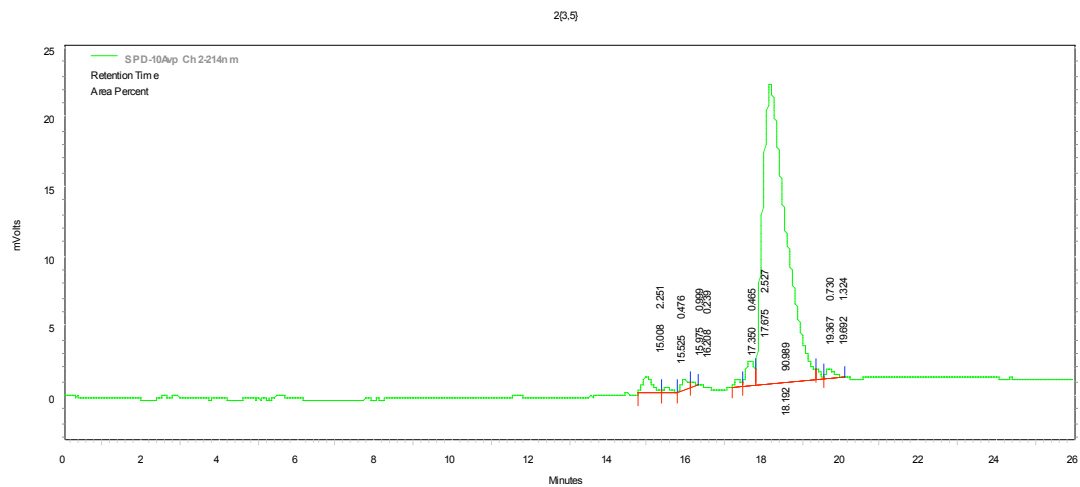

**1,4-disubstituted 1,2,3-triazole member 2{3,6}. HPLC (CH<sub>3</sub>OH : H<sub>2</sub>O) R<sub>T</sub> 12.07 (82%), gradient elution 55% to 95% over 21 min.**

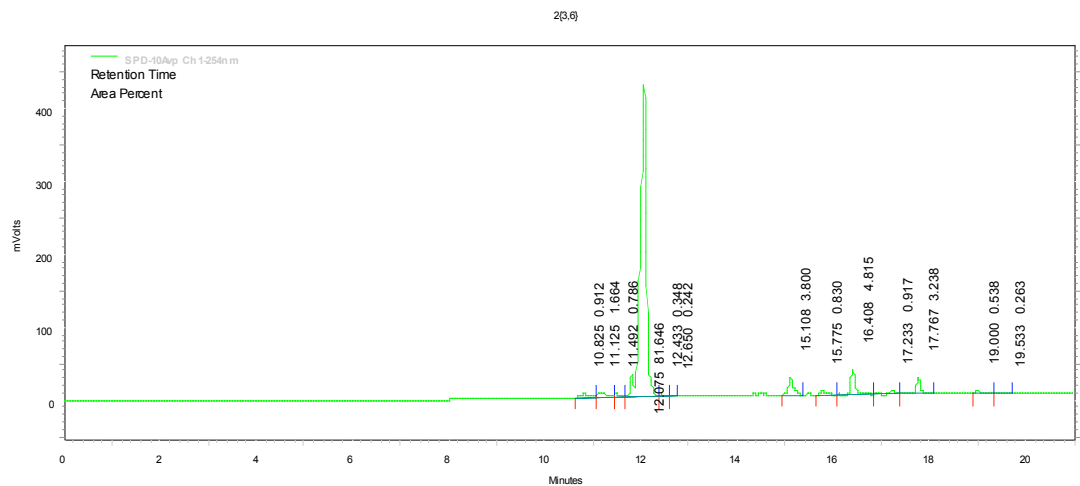

**1,4-disubstituted 1,2,3-triazole member 2{3,7}**. HPLC (CH<sub>3</sub>OH : H<sub>2</sub>O) R<sub>T</sub> 6.59 (96%), gradient elution 55% to 95% over 9 min.

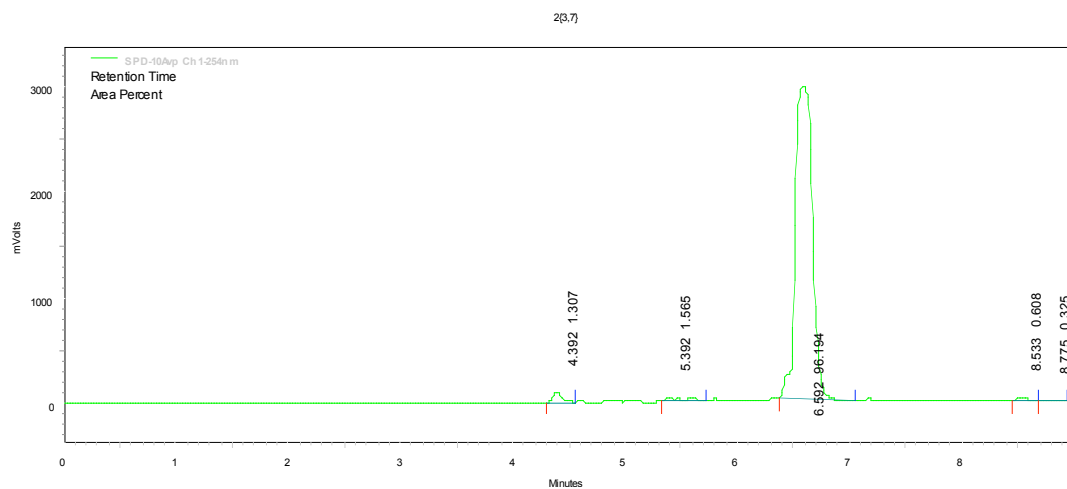

**1,4-disubstituted 1,2,3-triazole member 2{3,8}**. HPLC (1% AcOH in CH<sub>3</sub>OH : H<sub>2</sub>O) R<sub>T</sub> 9.95 (84%), gradient elution 55% to 95% over 21 min.

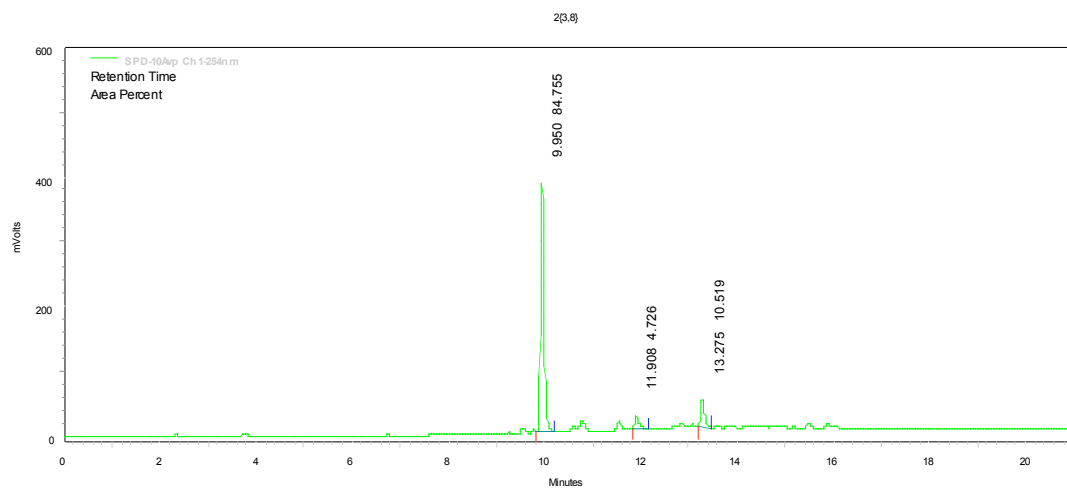

**1,4-disubstituted 1,2,3-triazole member 2{3,9}. HPLC (CH<sub>3</sub>OH : H<sub>2</sub>O) R<sub>T</sub> 15.64 (85%).**

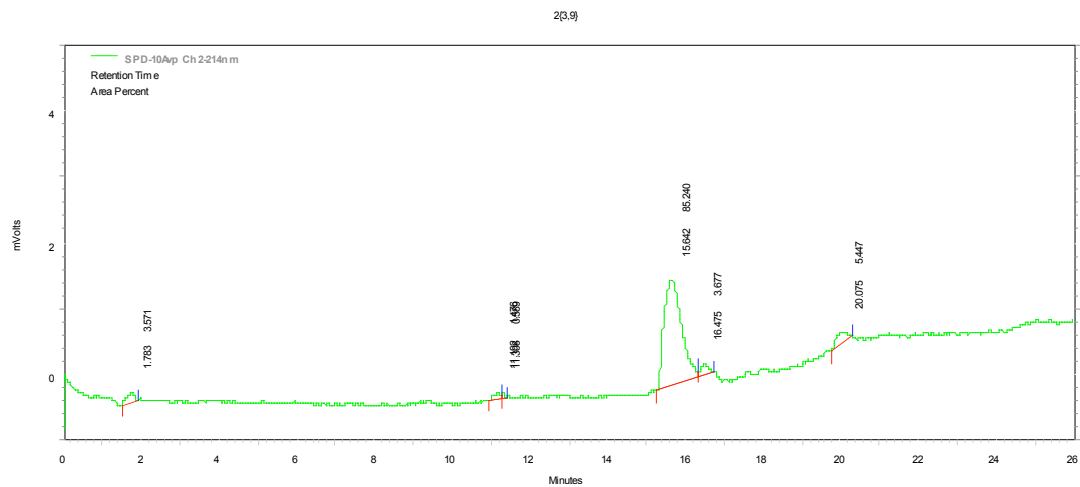

**1,4-disubstituted 1,2,3-triazole member 2{4,1}. HPLC (1% AcOH in CH<sub>3</sub>OH : H<sub>2</sub>O) R<sub>T</sub> 2.50 (100%), gradient elution 30% to 90% over 26 min.**

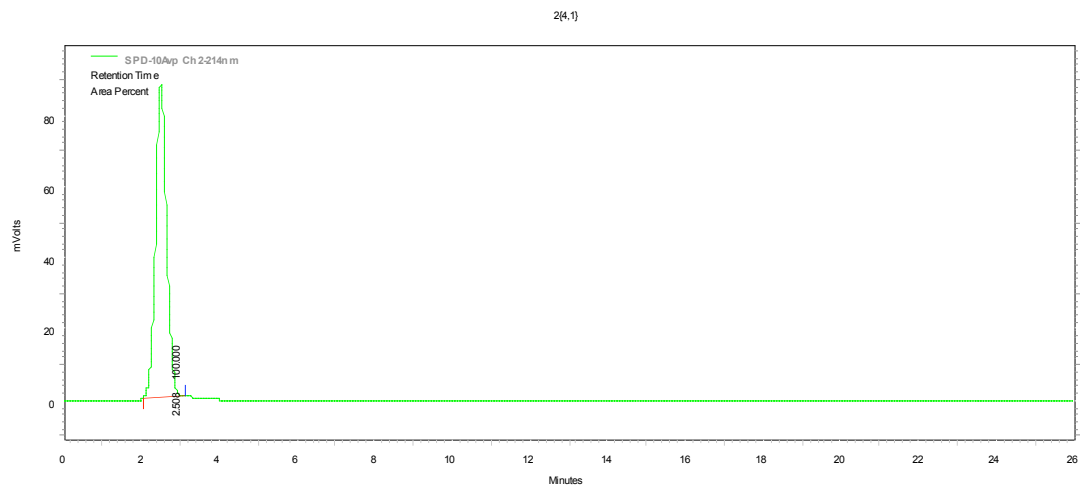

**1,4-disubstituted 1,2,3-triazole member 2{4,2}**. HPLC (1% AcOH in CH<sub>3</sub>OH : H<sub>2</sub>O) R<sub>T</sub> 2.92 (98%), gradient elution 30% to 90% over 13 min.

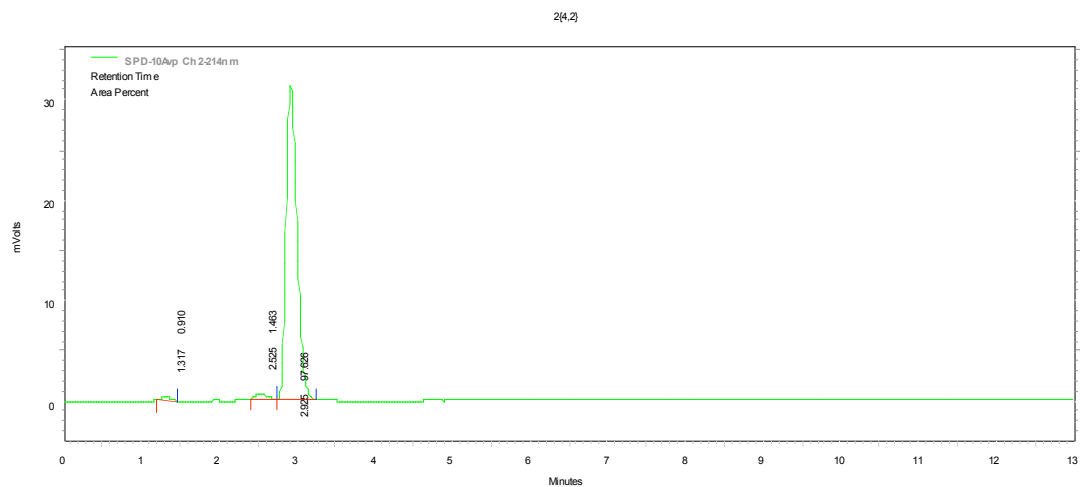

**1,4-disubstituted 1,2,3-triazole member 2{4,3}**. HPLC (CH<sub>3</sub>OH : H<sub>2</sub>O) R<sub>T</sub> 15.42 (95%).

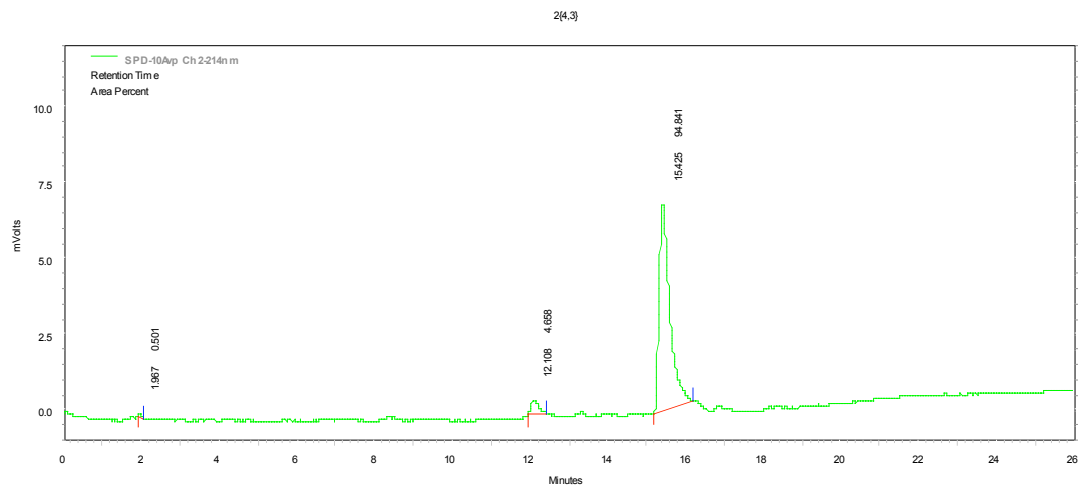



**1,4-disubstituted 1,2,3-triazole member 2{4,4}**. HPLC (CH<sub>3</sub>OH : H<sub>2</sub>O) R<sub>T</sub> 14.47 (84%), gradient elution 55% to 95% over 21 min.

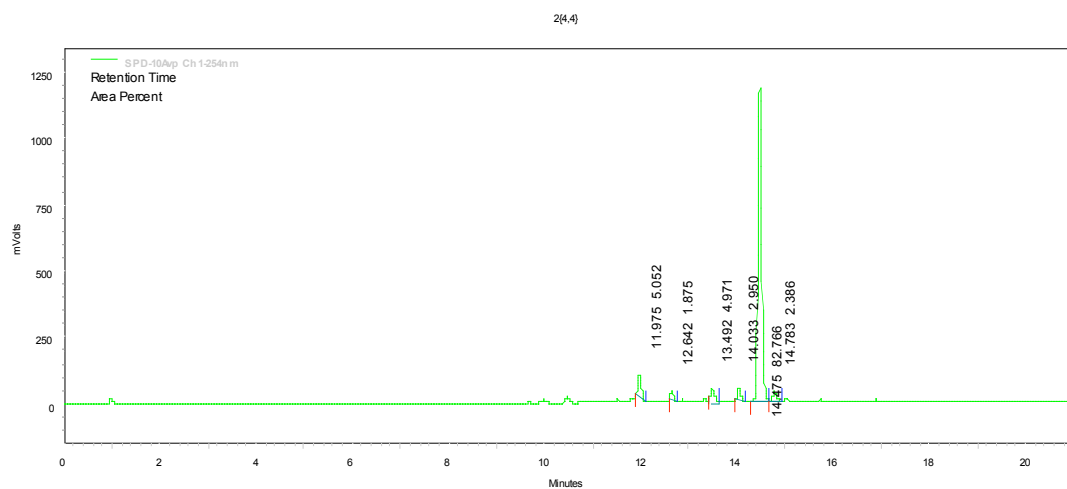

**1,4-disubstituted 1,2,3-triazole member 2{4,5}**. HPLC (1% AcOH in CH<sub>3</sub>OH : H<sub>2</sub>O) R<sub>T</sub> 2.32 (100%), gradient elution 30% to 90% over 20 min.

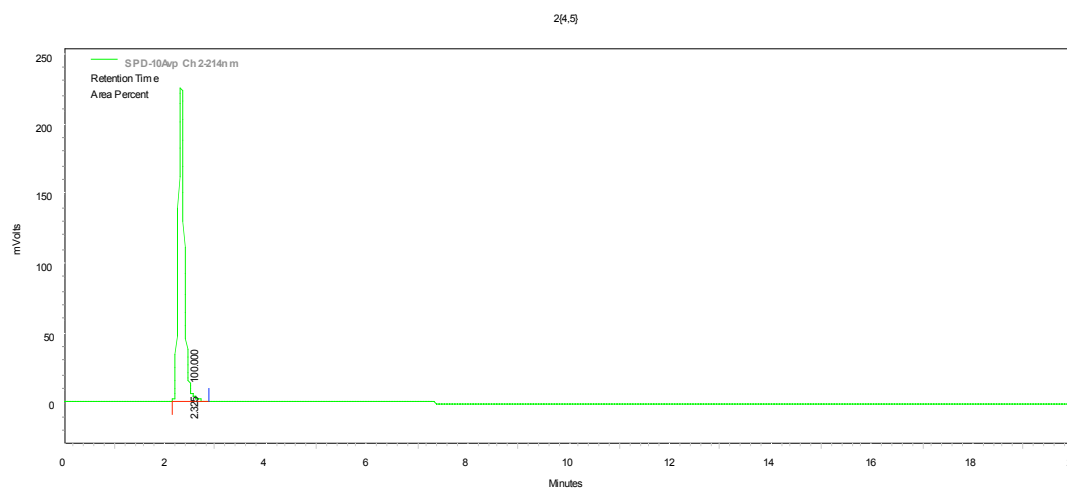

**1,4-disubstituted 1,2,3-triazole member 2{4,6}**. HPLC (CH<sub>3</sub>OH : H<sub>2</sub>O) R<sub>T</sub> 10.20 (80%), gradient elution 55% to 95% over 21 min.

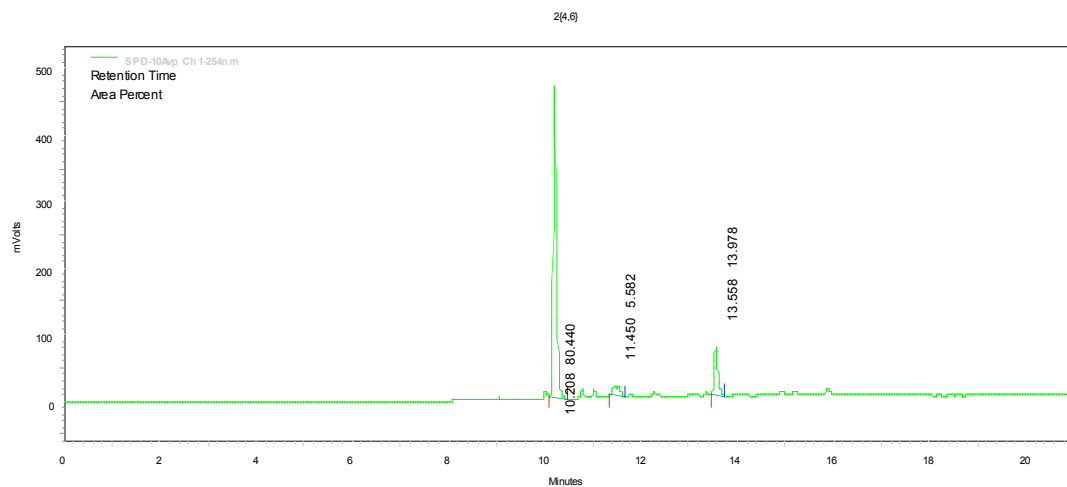

**1,4-disubstituted 1,2,3-triazole member 2{4,7}**. HPLC (CH<sub>3</sub>OH : H<sub>2</sub>O) R<sub>T</sub> 13.88 (97%), gradient elution 55% to 95% over 21 min.

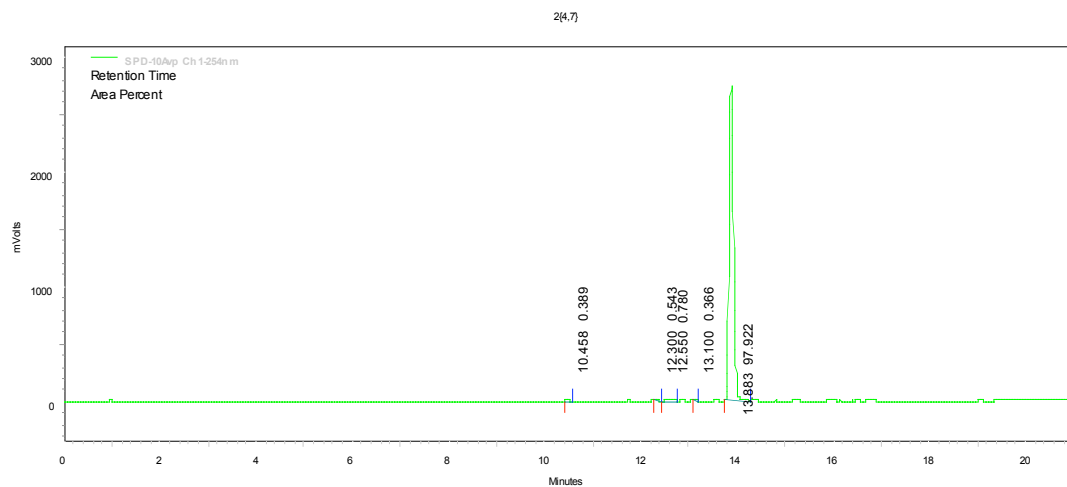

**1,4-disubstituted 1,2,3-triazole member 2{4,8}**. HPLC (CH<sub>3</sub>OH : H<sub>2</sub>O) R<sub>T</sub> 11.89 (84%), gradient elution 55% to 95% over 21 min.

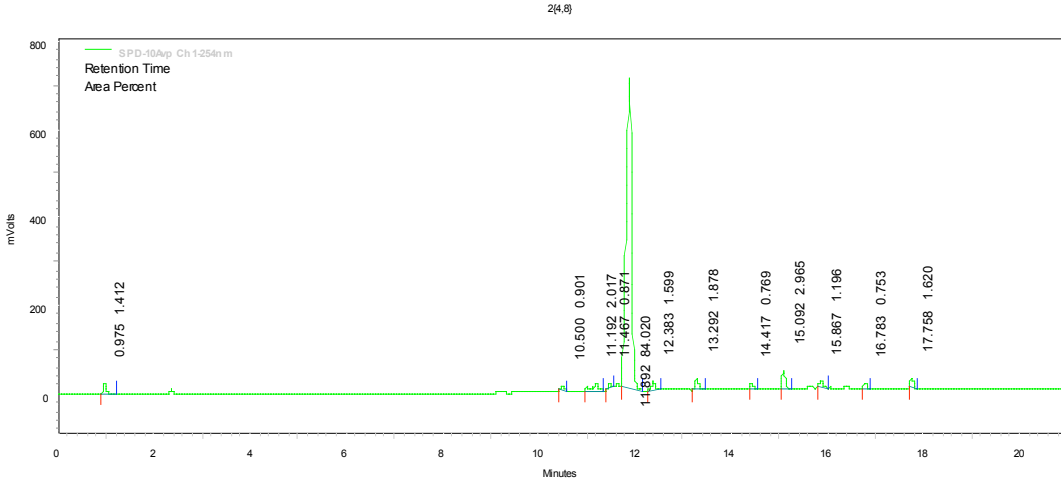

**1,4-disubstituted 1,2,3-triazole member 2{4,9}**. HPLC (1% AcOH in CH<sub>3</sub>OH : H<sub>2</sub>O) R<sub>T</sub> 9.05 (81%), gradient elution 55% to 95% over 20 min.

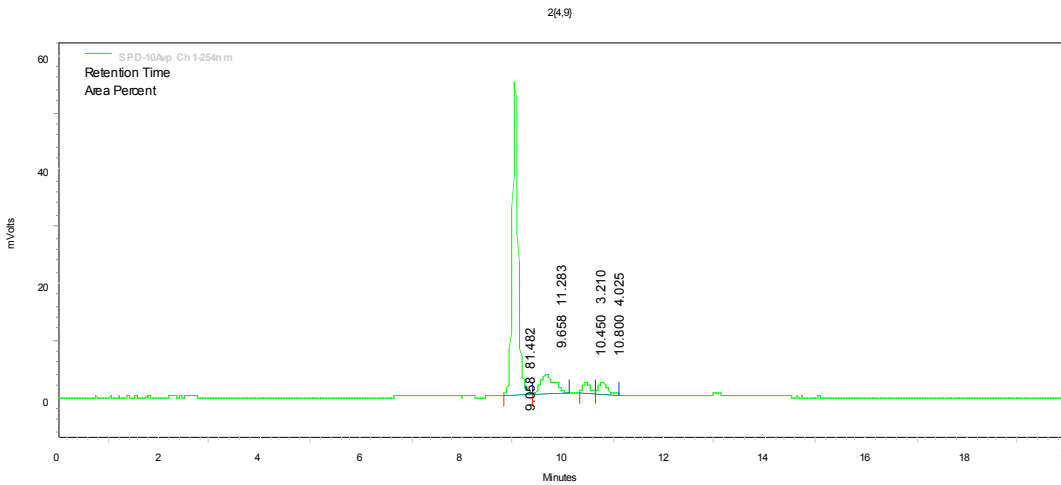

**1,4-disubstituted 1,2,3-triazole member 2{5,1}**. HPLC (1% AcOH in CH<sub>3</sub>OH : H<sub>2</sub>O) R<sub>T</sub> 8.64 (96%), gradient elution 30% to 90% over 26 min.

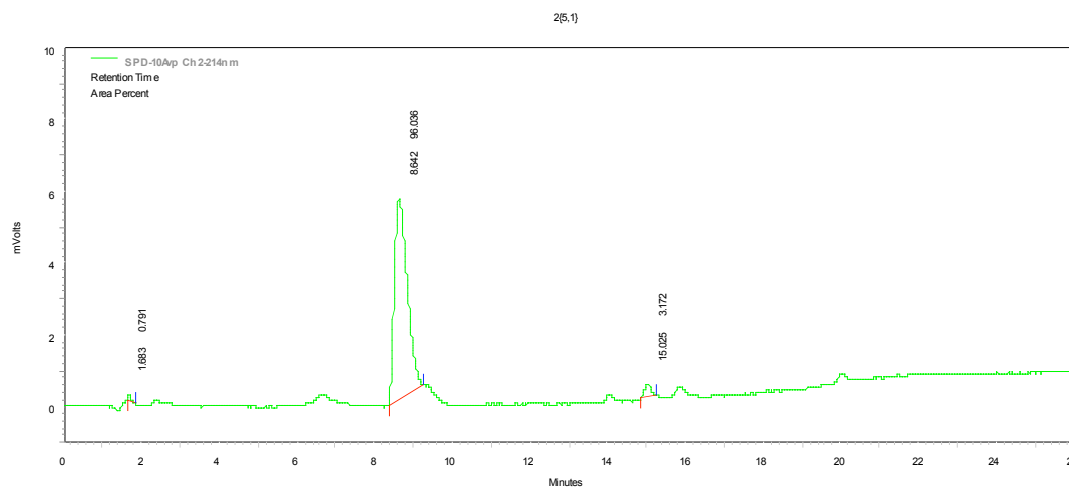

**1,4-disubstituted 1,2,3-triazole member 2{5,2}**. HPLC (1% AcOH in CH<sub>3</sub>OH : H<sub>2</sub>O) R<sub>T</sub> 9.90 (99%), gradient elution 30% to 90% over 26 min.

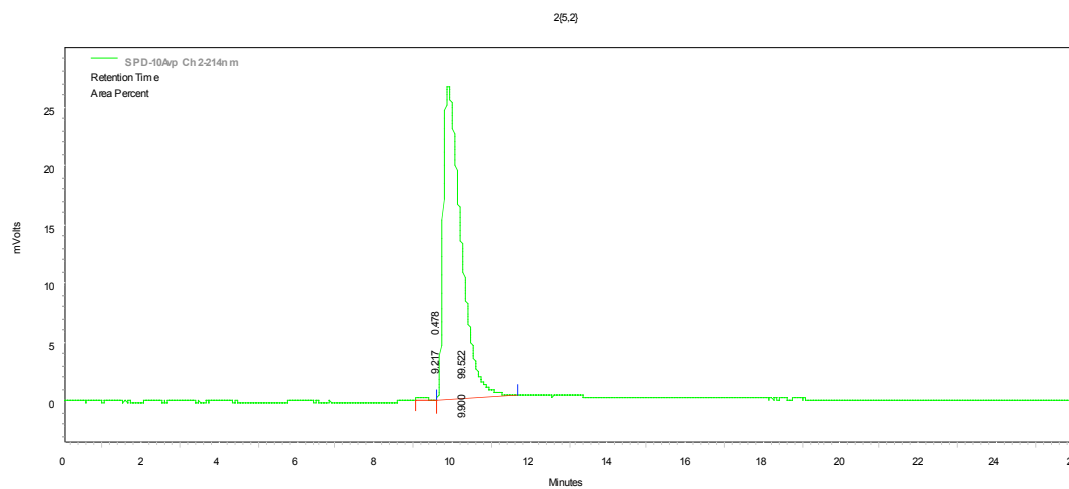

**1,4-disubstituted 1,2,3-triazole member 2{5,3}**. HPLC (1% AcOH in CH<sub>3</sub>OH : H<sub>2</sub>O) R<sub>T</sub> 4.05 (94%), gradient elution 30% to 90% over 26 min.

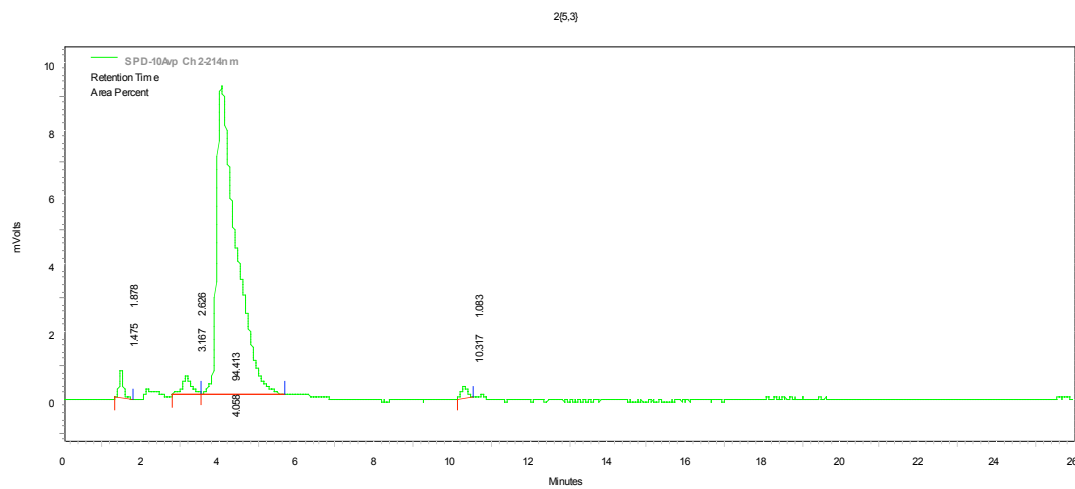

**1,4-disubstituted 1,2,3-triazole member 2{5,4}**. HPLC (1% AcOH in CH<sub>3</sub>OH : H<sub>2</sub>O) R<sub>T</sub> 2.39 (100%), gradient elution 30% to 90% over 26 min.

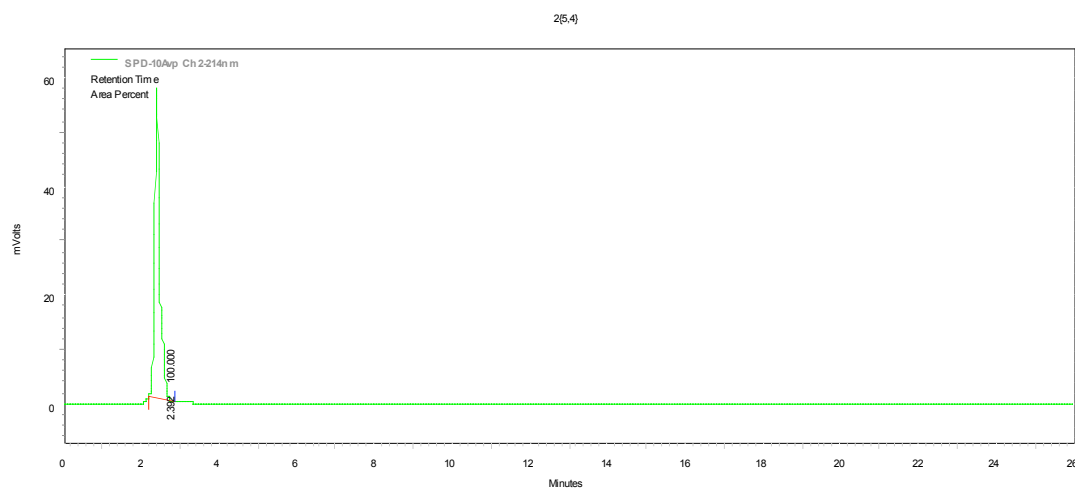

**1,4-disubstituted 1,2,3-triazole member 2{5,5}**. HPLC (1% AcOH in CH<sub>3</sub>OH : H<sub>2</sub>O) R<sub>T</sub> 2.49 (100%), gradient elution 30% to 90% over 26 min.

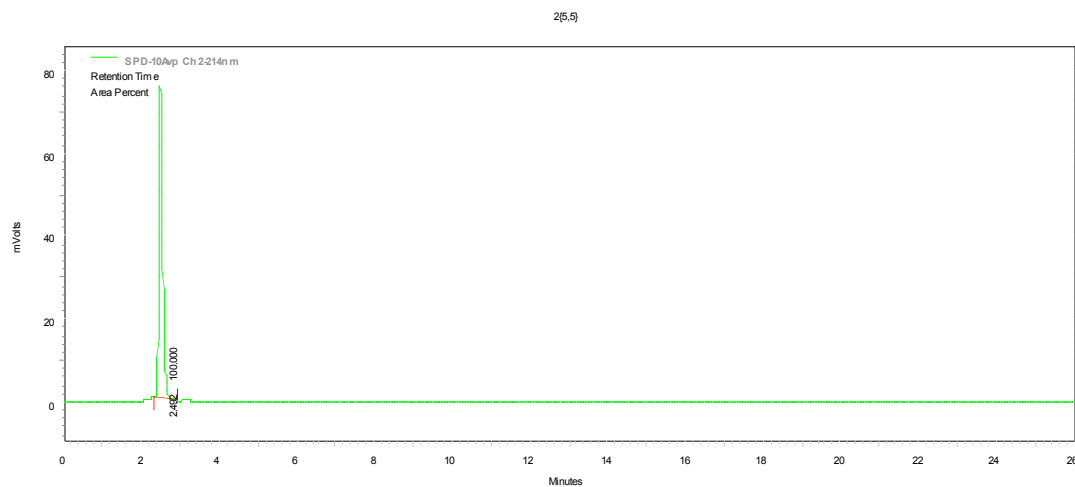

**1,4-disubstituted 1,2,3-triazole member 2{5,6}**. HPLC (CH<sub>3</sub>OH : H<sub>2</sub>O) R<sub>T</sub> 10.70 (80%), gradient elution 55% to 95% over 21 min.

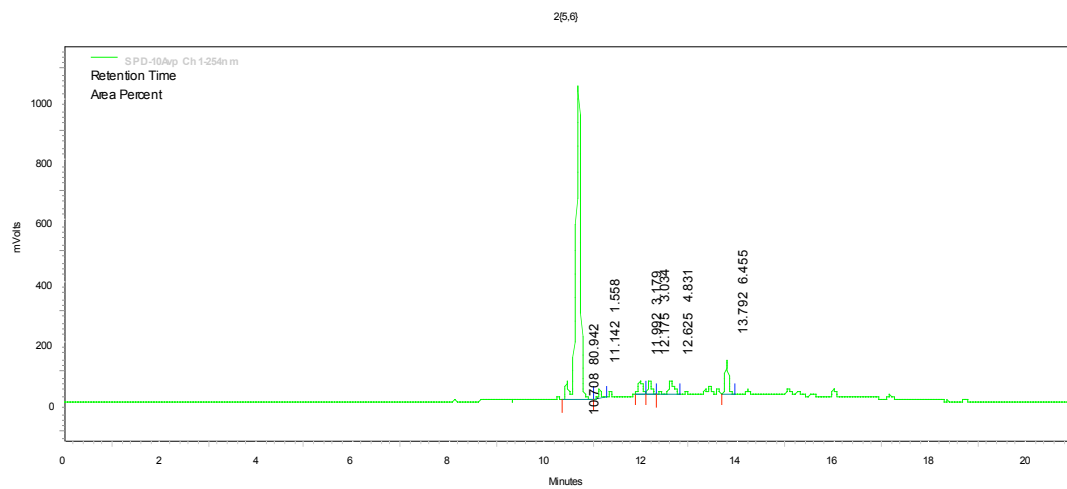

**1,4-disubstituted 1,2,3-triazole member 2{5,7}**. HPLC (CH<sub>3</sub>OH : H<sub>2</sub>O) R<sub>T</sub> 13.57 (92%), gradient elution 55% to 95% over 21 min.

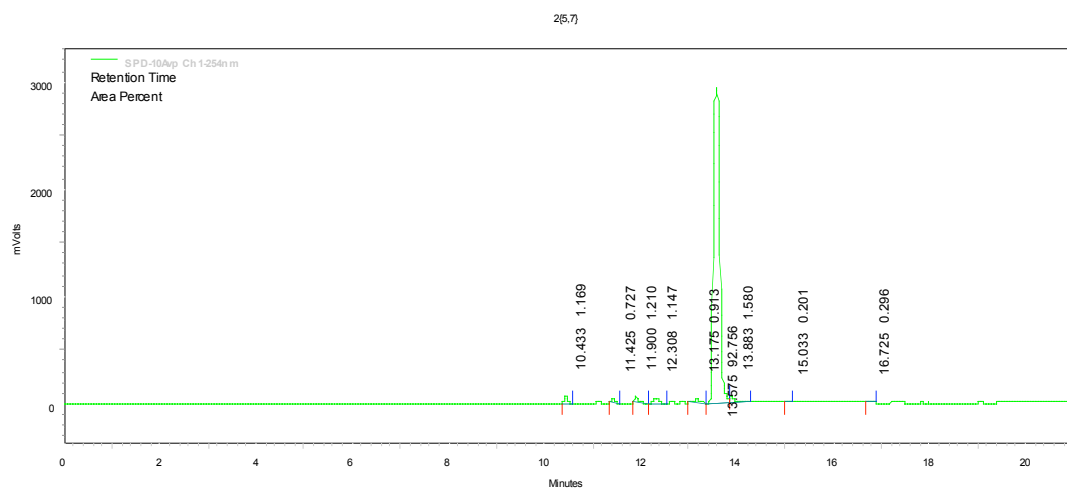

**1,4-disubstituted 1,2,3-triazole member 2{5,8}**. HPLC (CH<sub>3</sub>OH : H<sub>2</sub>O) R<sub>T</sub> 13.06 (85%).

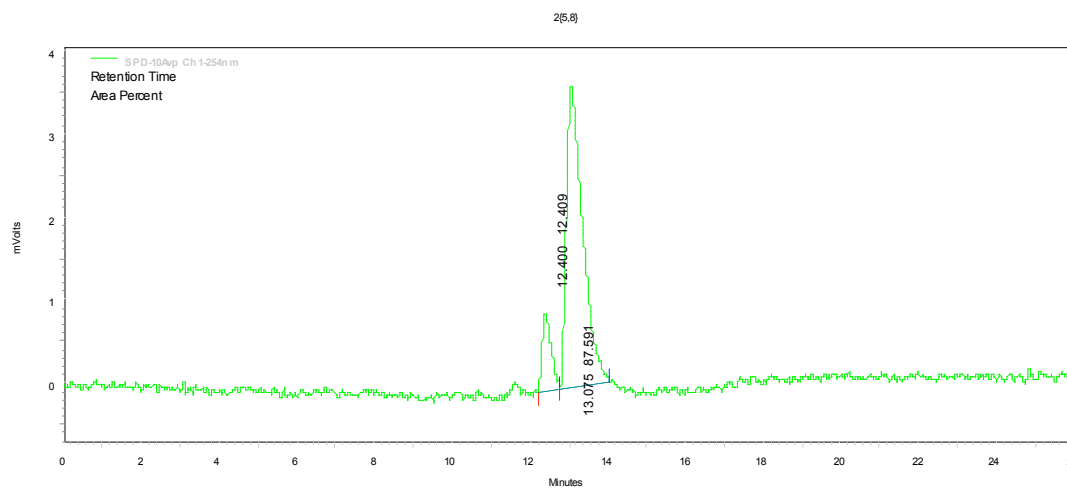

**1,4-disubstituted 1,2,3-triazole member 2{5,9}. HPLC (CH<sub>3</sub>OH : H<sub>2</sub>O) R<sub>T</sub> 10.60 (84%).**

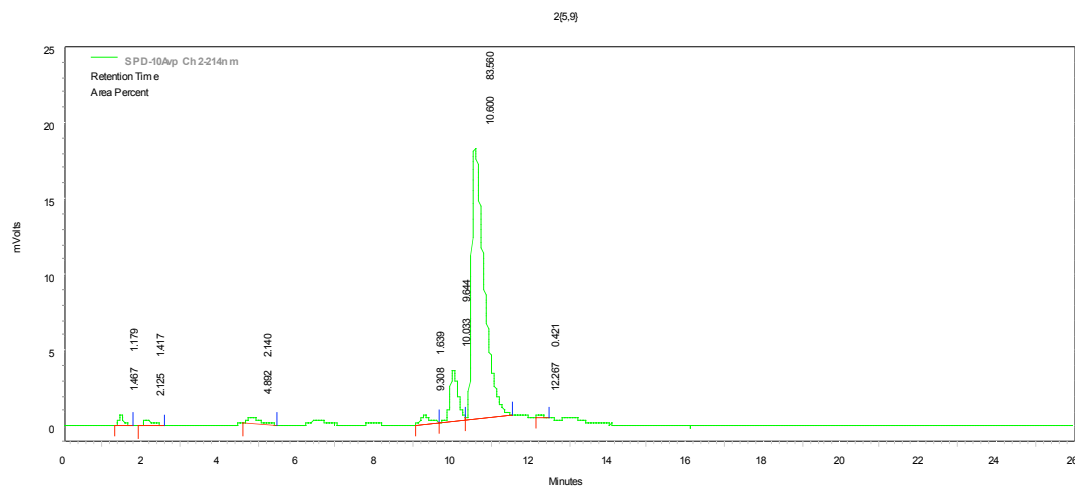

**1,4-disubstituted 1,2,3-triazole member 2{6,1}. HPLC (CH<sub>3</sub>OH : H<sub>2</sub>O) R<sub>T</sub> 17.45 (94%).**

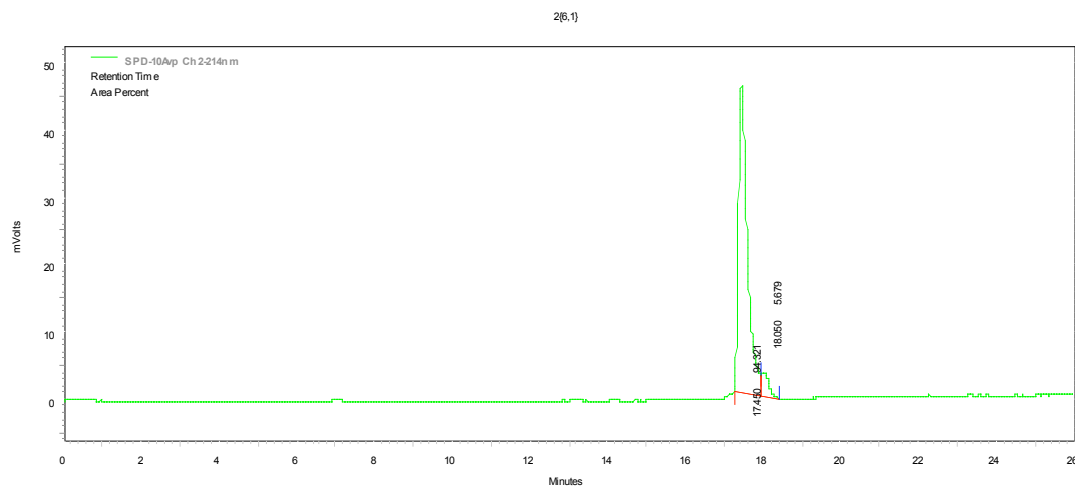



**1,4-disubstituted 1,2,3-triazole member 2{6,2}. HPLC (1% AcOH in CH<sub>3</sub>OH : H<sub>2</sub>O) R<sub>T</sub> 2.50 (84%), gradient elution 30% to 90% over 21 min.**

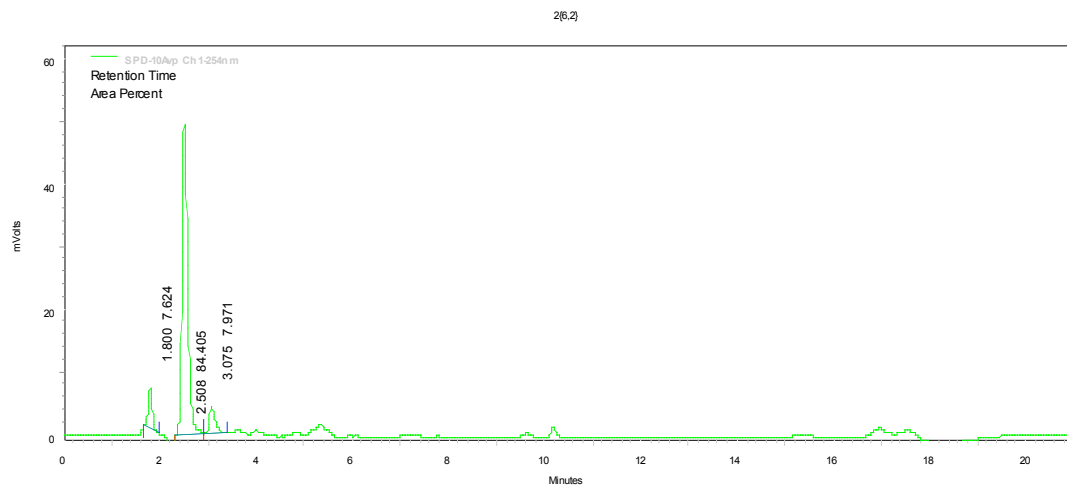

**1,4-disubstituted 1,2,3-triazole member 2{6,3}. HPLC (CH<sub>3</sub>OH : H<sub>2</sub>O) R<sub>T</sub> 15.19 (84%).**

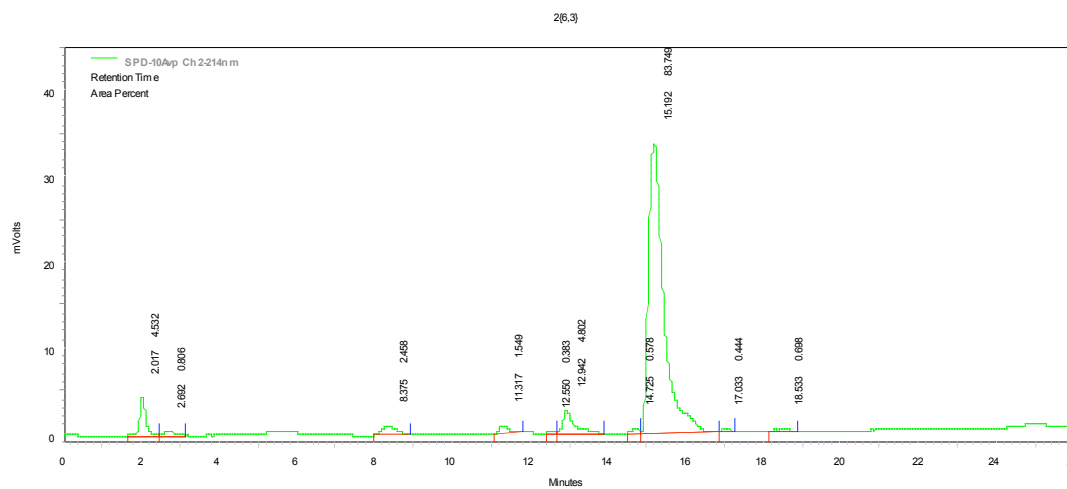

**1,4-disubstituted 1,2,3-triazole member 2{6,4}. HPLC (CH<sub>3</sub>OH : H<sub>2</sub>O) R<sub>T</sub> 9.54 (100%).**

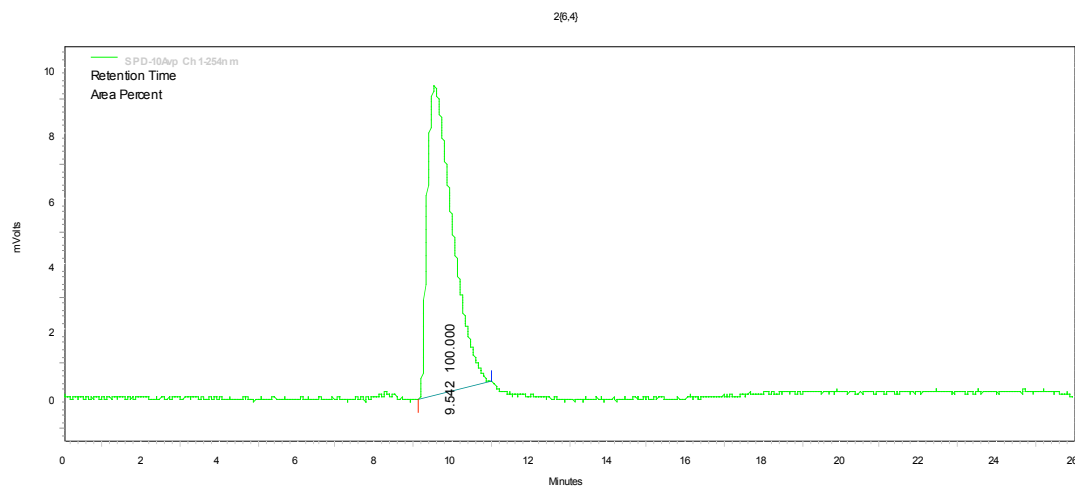

**1,4-disubstituted 1,2,3-triazole member 2{6,5}. HPLC (1% AcOH in CH<sub>3</sub>OH : H<sub>2</sub>O) R<sub>T</sub> 2.52 (89%), gradient elution 30% to 90% over 21 min.**

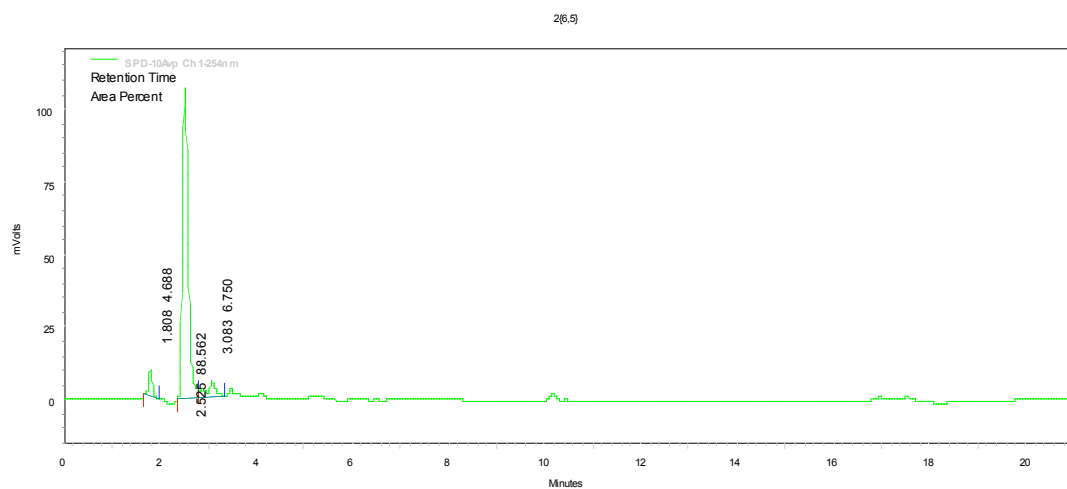

**1,4-disubstituted 1,2,3-triazole member 2{6,6}**. HPLC (CH<sub>3</sub>OH : H<sub>2</sub>O) R<sub>T</sub> 9.76 (80%), gradient elution 55% to 95% over 21 min.

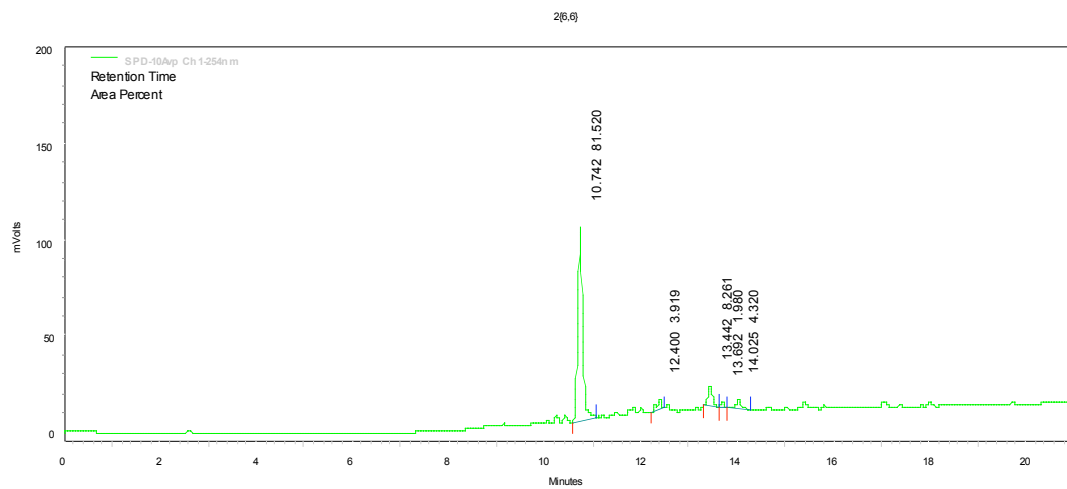

**1,4-disubstituted 1,2,3-triazole member 2{6,7}**. HPLC (1% AcOH in CH<sub>3</sub>OH : H<sub>2</sub>O) R<sub>T</sub> 3.12 (98%), gradient elution 30% to 90% over 26 min.

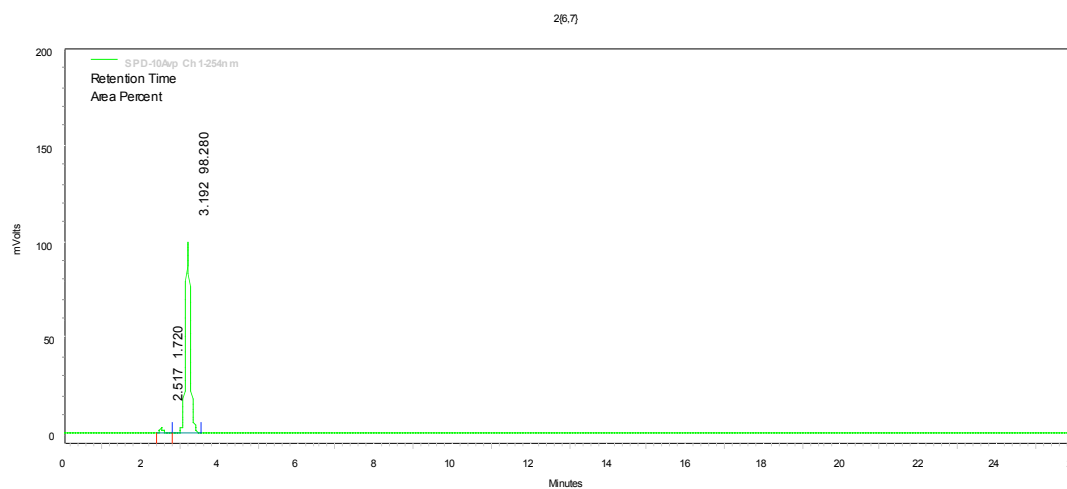

**1,4-disubstituted 1,2,3-triazole member 2{6,8}. HPLC (CH<sub>3</sub>OH : H<sub>2</sub>O) R<sub>T</sub> 17.21 (94%).**

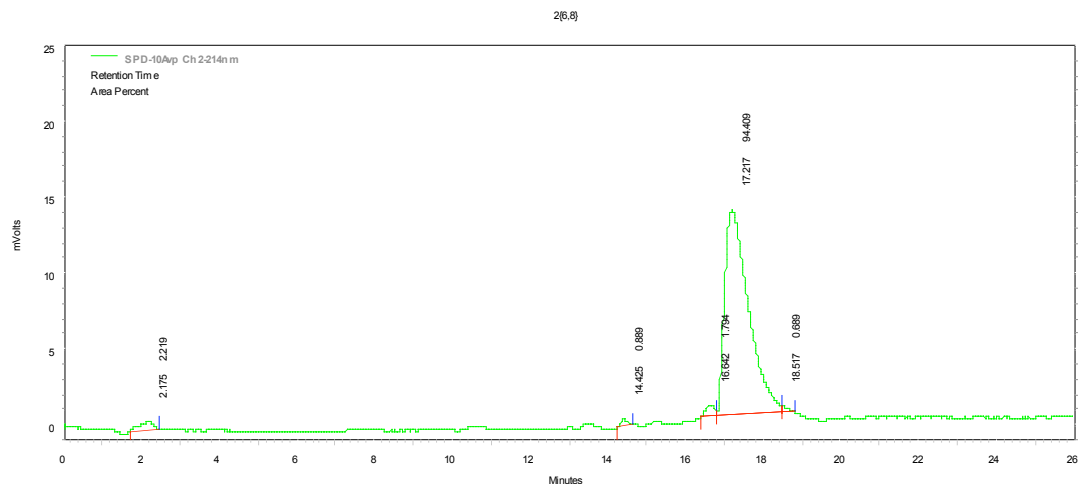

**1,4-disubstituted 1,2,3-triazole member 2{6,9}. HPLC (CH<sub>3</sub>OH : H<sub>2</sub>O) R<sub>T</sub> 15.34 (95%).**

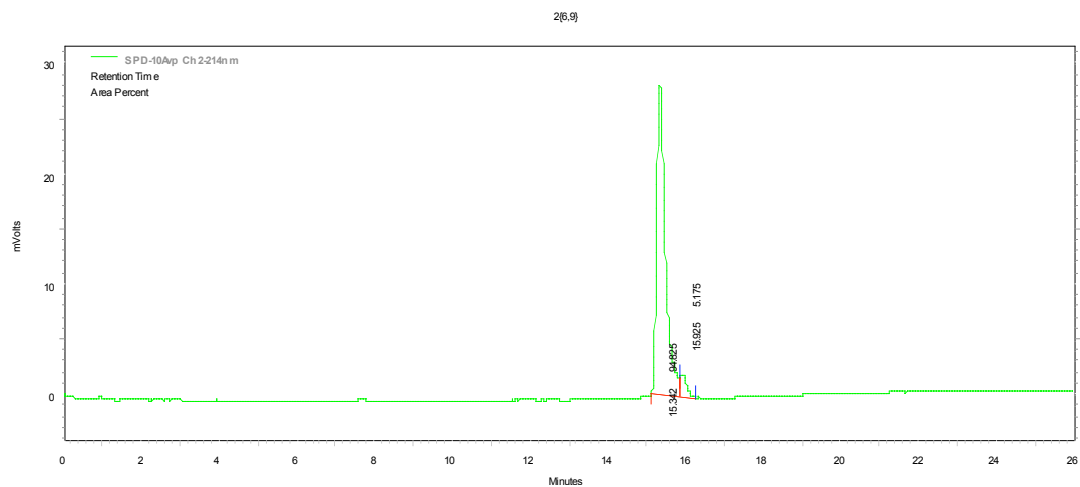

**1,4-disubstituted 1,2,3-triazole member 2{7,1}. HPLC (CH<sub>3</sub>OH : H<sub>2</sub>O) R<sub>T</sub> 15.91 (100%).**

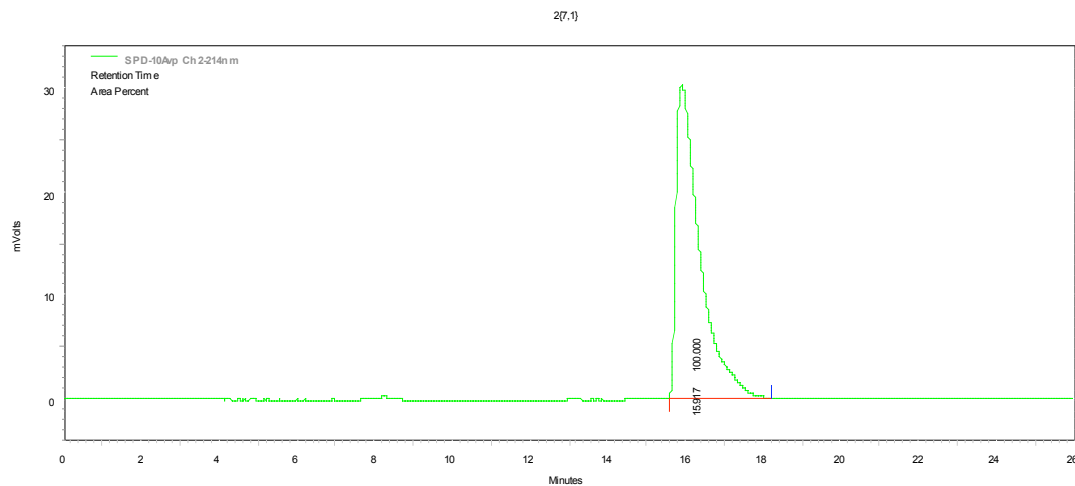

**1,4-disubstituted 1,2,3-triazole member 2{7,2}. HPLC (CH<sub>3</sub>OH : H<sub>2</sub>O) R<sub>T</sub> 15.72 (86%).**

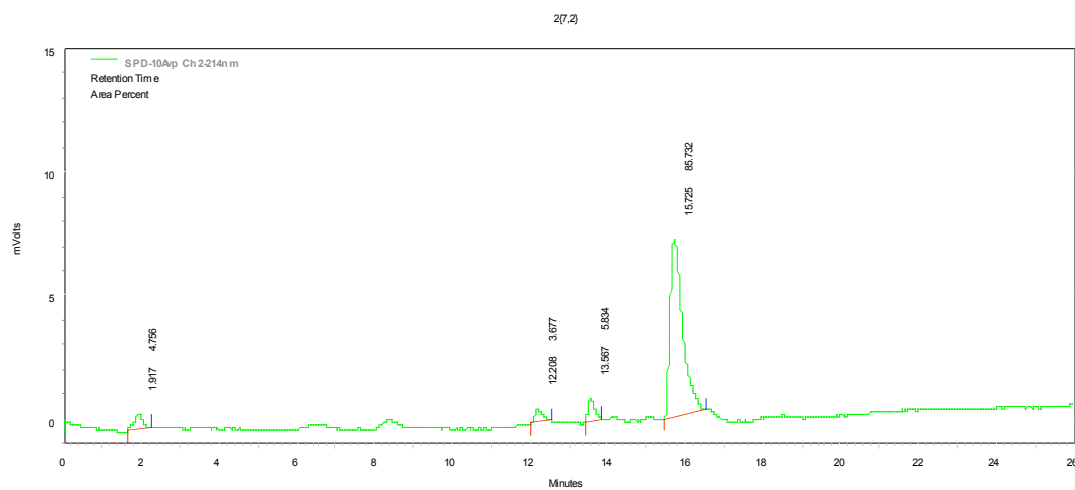

**1,4-disubstituted 1,2,3-triazole member 2{7,3}**. HPLC (1% AcOH in CH<sub>3</sub>OH : H<sub>2</sub>O) R<sub>T</sub> 13.95 (99%), gradient elution 30% to 90% over 21 min.

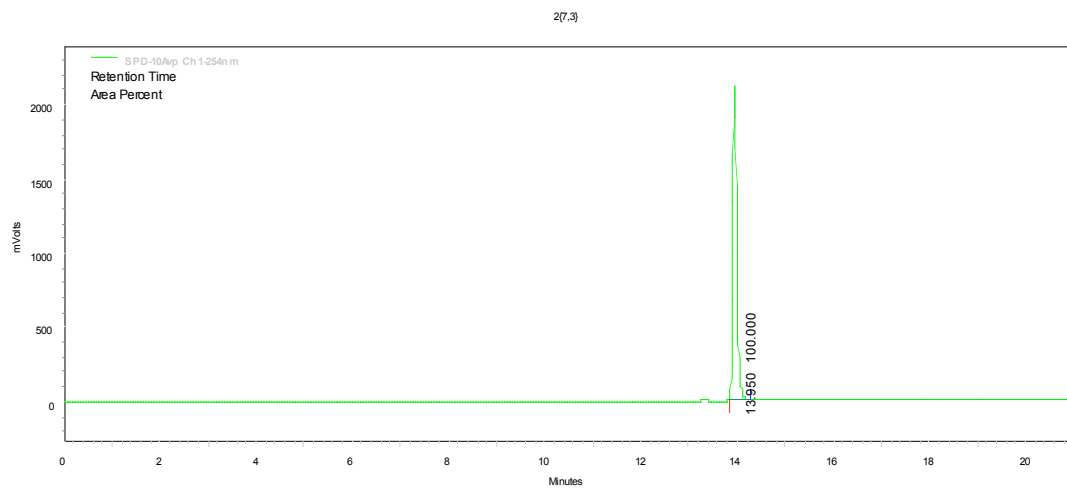

**1,4-disubstituted 1,2,3-triazole member 2{7,4}**. HPLC (1% AcOH in CH<sub>3</sub>OH : H<sub>2</sub>O) R<sub>T</sub> 9.05 (90%), gradient elution 30% to 90% over 14 min.

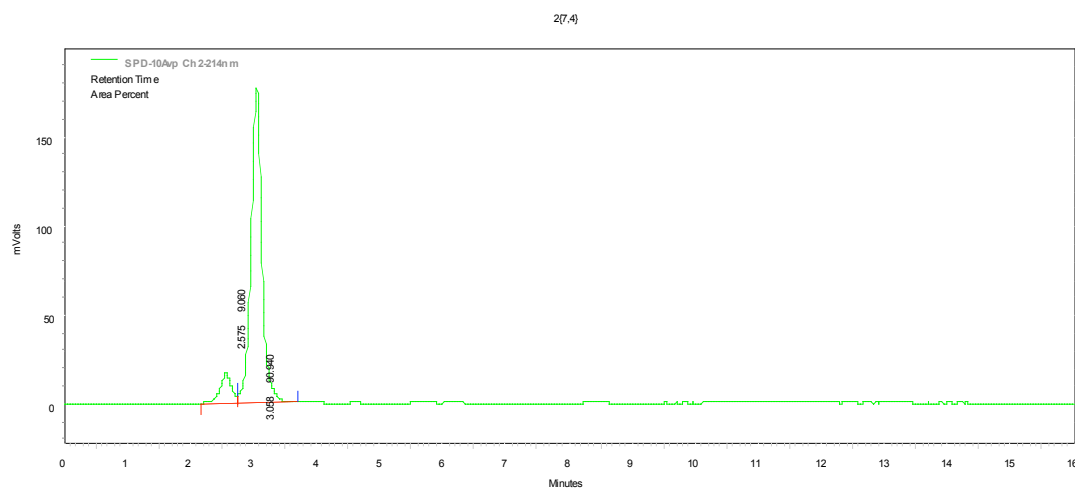

**1,4-disubstituted 1,2,3-triazole member 2{7,5}**. HPLC (1% AcOH in CH<sub>3</sub>OH : H<sub>2</sub>O) R<sub>T</sub> 2.54 (90%), gradient elution 30% to 90% over 21 min.

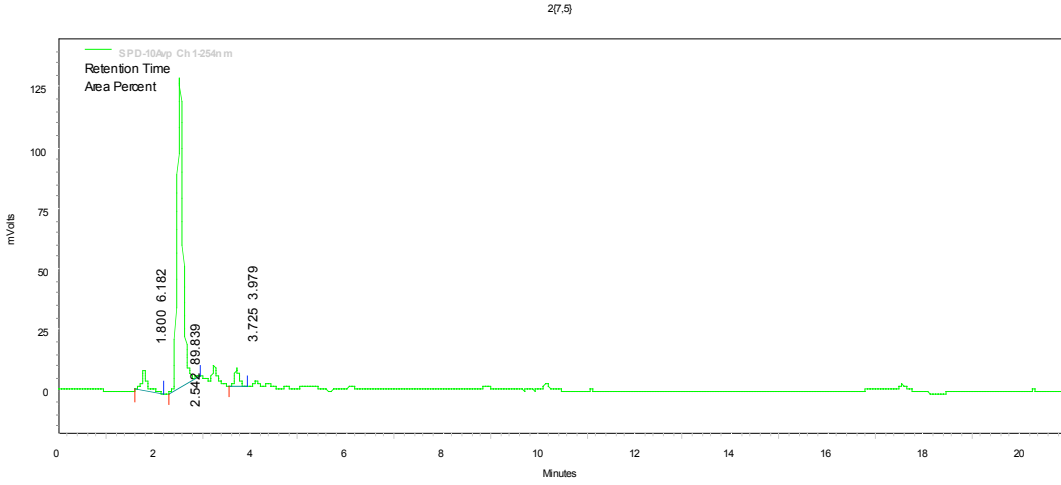

**1,4-disubstituted 1,2,3-triazole member 2{7,6}**. HPLC (CH<sub>3</sub>OH : H<sub>2</sub>O) R<sub>T</sub> 9.79 (84%), gradient elution 55% to 95% over 21 min.

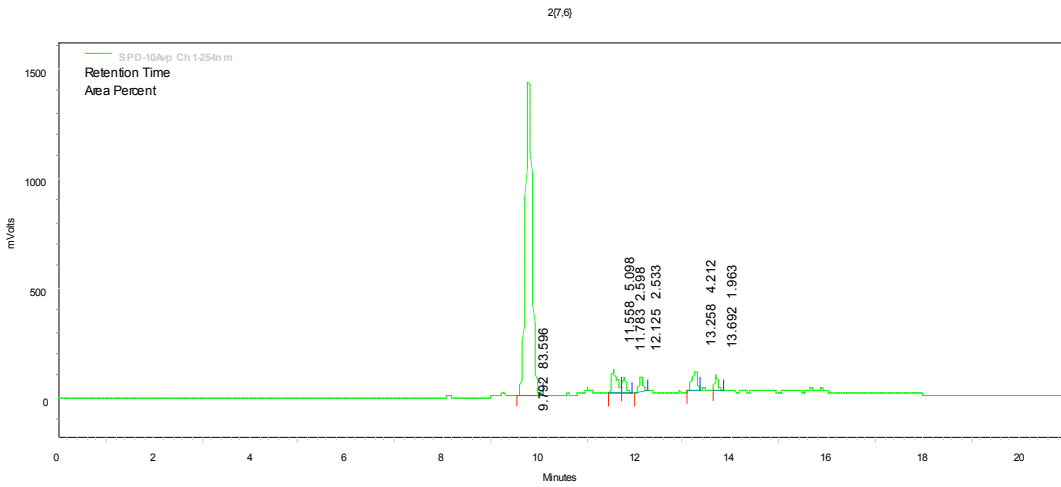

**1,4-disubstituted 1,2,3-triazole member 2{7,7}. HPLC (CH<sub>3</sub>OH : H<sub>2</sub>O) R<sub>T</sub> 14.25 (99%), gradient elution 55% to 95% over 21 min.**

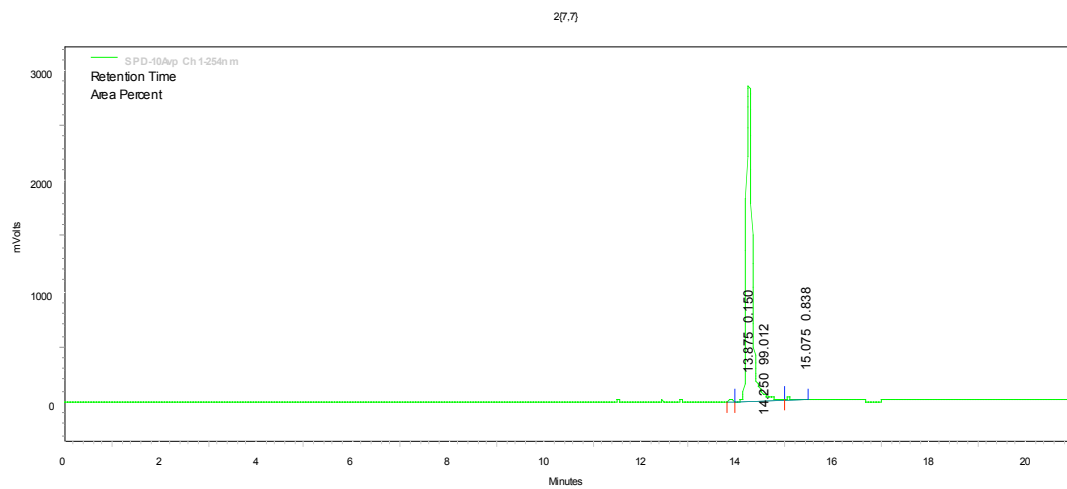

**1,4-disubstituted 1,2,3-triazole member 2{7,8}. HPLC (CH<sub>3</sub>OH : H<sub>2</sub>O) R<sub>T</sub> 16.53 (96%).**

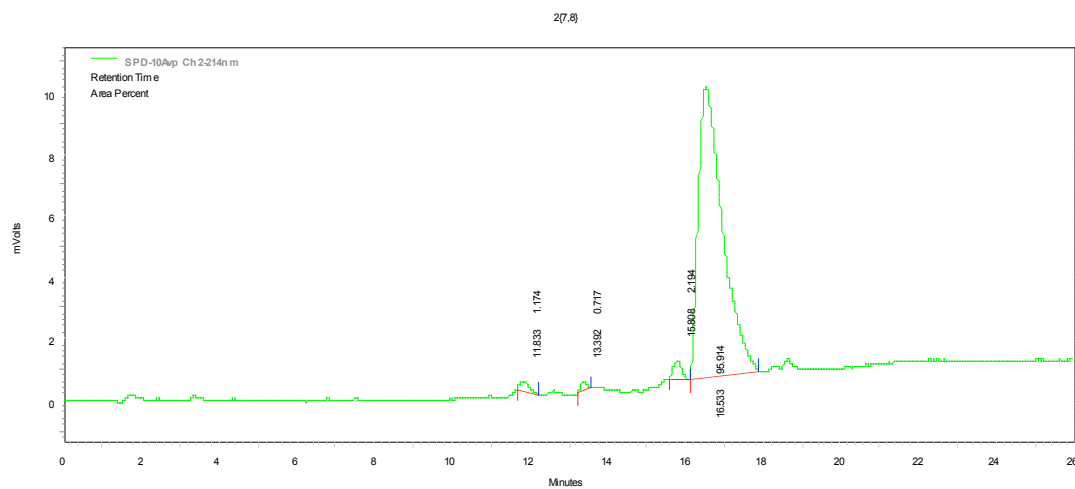



**1,4-disubstituted 1,2,3-triazole member 2{7,9}. HPLC (CH<sub>3</sub>OH : H<sub>2</sub>O) R<sub>T</sub> 14.96 (86%).**

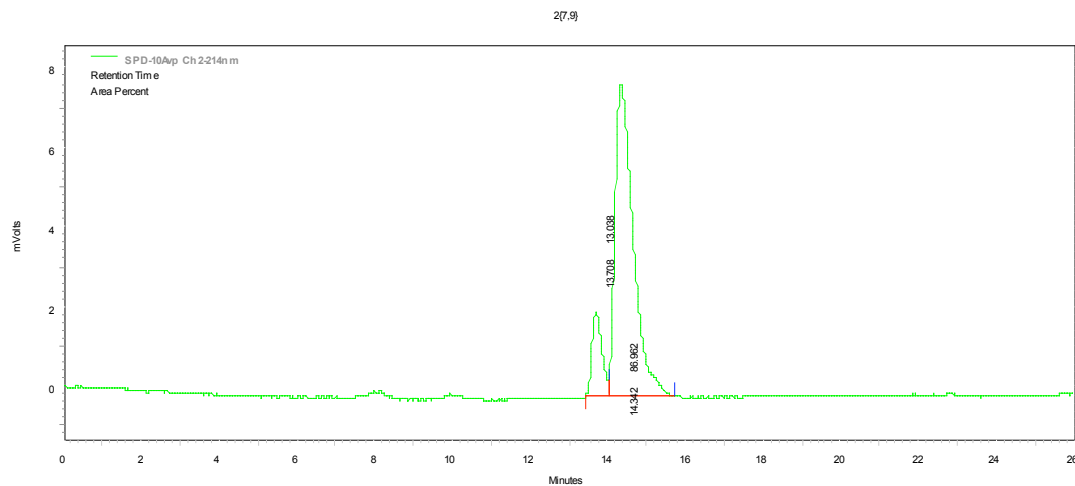

**1,4-disubstituted 1,2,3-triazole member 2{8,1}. HPLC (CH<sub>3</sub>OH : H<sub>2</sub>O) R<sub>T</sub> 17.71 (92%).**

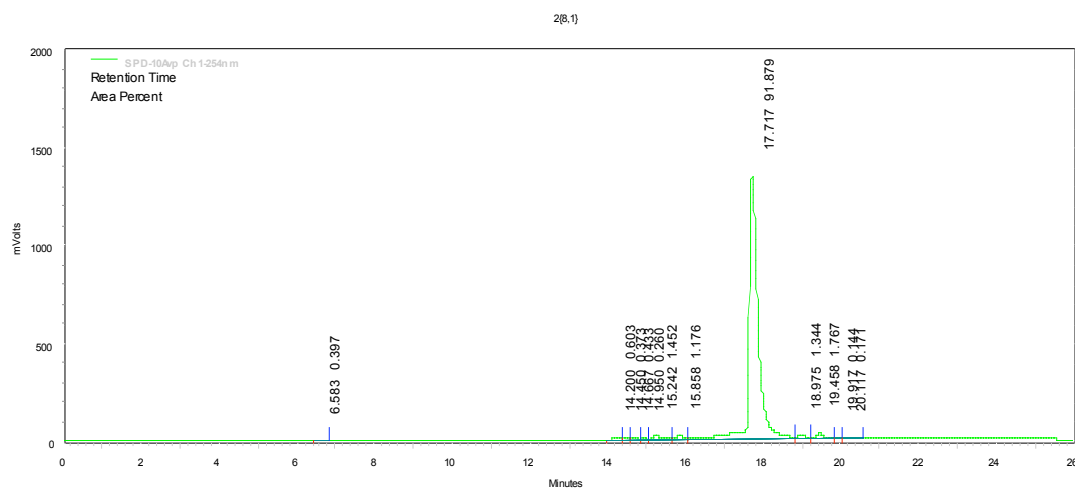

**1,4-disubstituted 1,2,3-triazole member 2{8,2}**. HPLC (1% AcOH in CH<sub>3</sub>OH : H<sub>2</sub>O) R<sub>T</sub> 4.18 (81%), gradient elution 30% to 90% over 9 min.

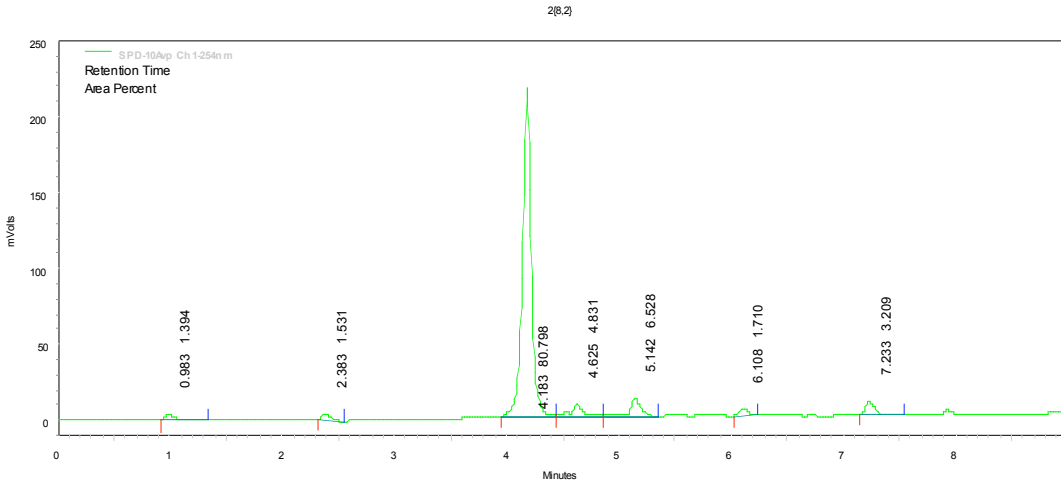

**1,4-disubstituted 1,2,3-triazole member 2{8,3}**. HPLC (CH<sub>3</sub>OH : H<sub>2</sub>O) R<sub>T</sub> 15.13 (84%).

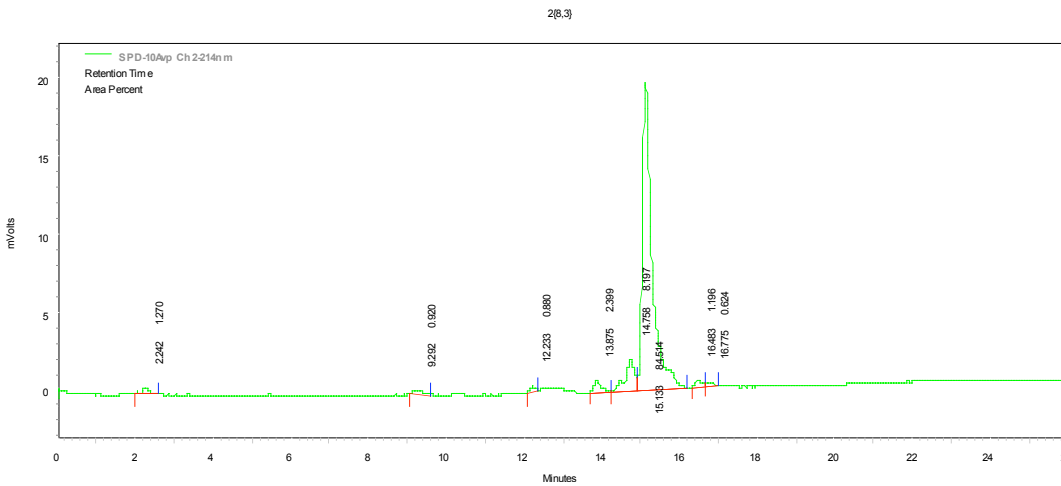

**1,4-disubstituted 1,2,3-triazole member 2{8,4}. HPLC (CH<sub>3</sub>OH : H<sub>2</sub>O) R<sub>T</sub> 13.99 (94%).**

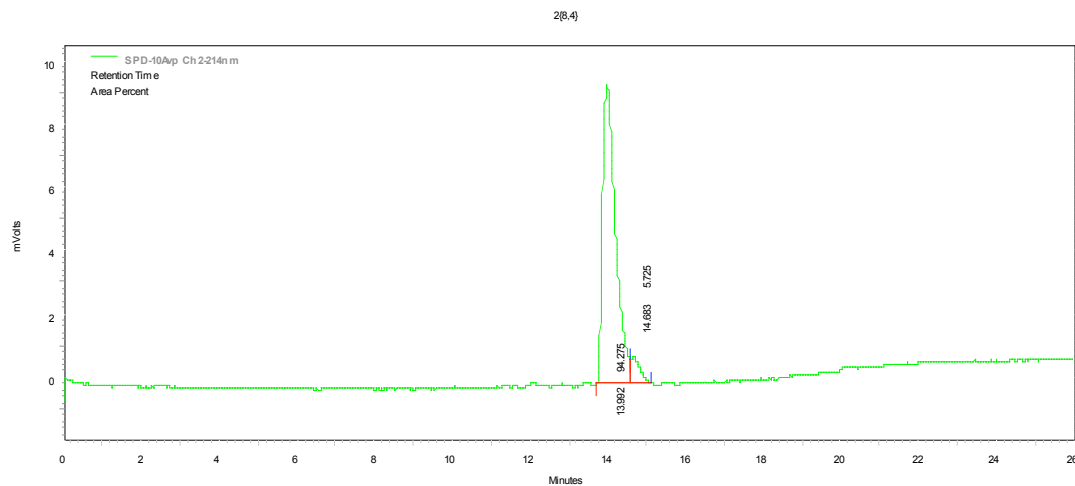

**1,4-disubstituted 1,2,3-triazole member 2{8,5}. HPLC (CH<sub>3</sub>OH : H<sub>2</sub>O) R<sub>T</sub> 15.00 (98%).**

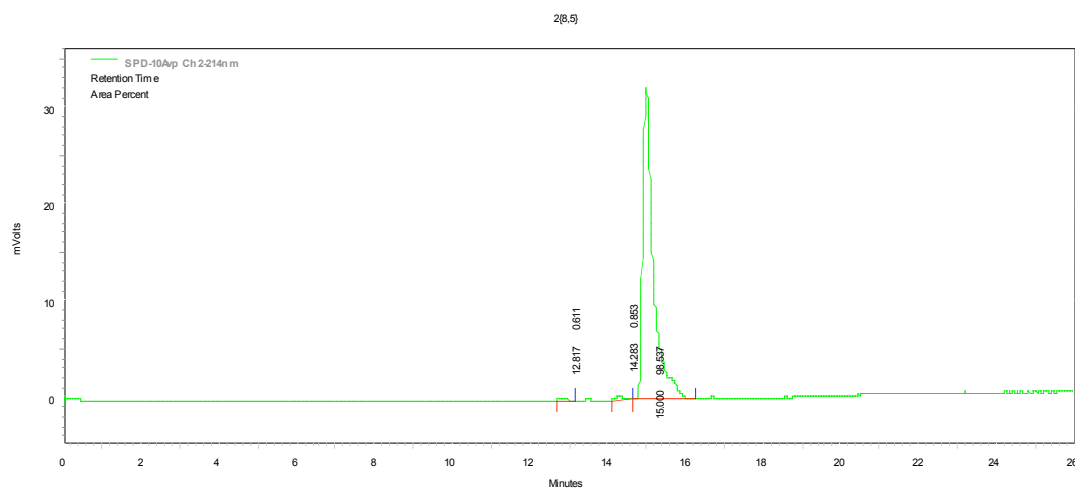

**1,4-disubstituted 1,2,3-triazole member 2{8,6}**. HPLC (CH<sub>3</sub>OH : H<sub>2</sub>O) R<sub>T</sub> 10.37 (81%), gradient elution 55% to 95% over 21 min.

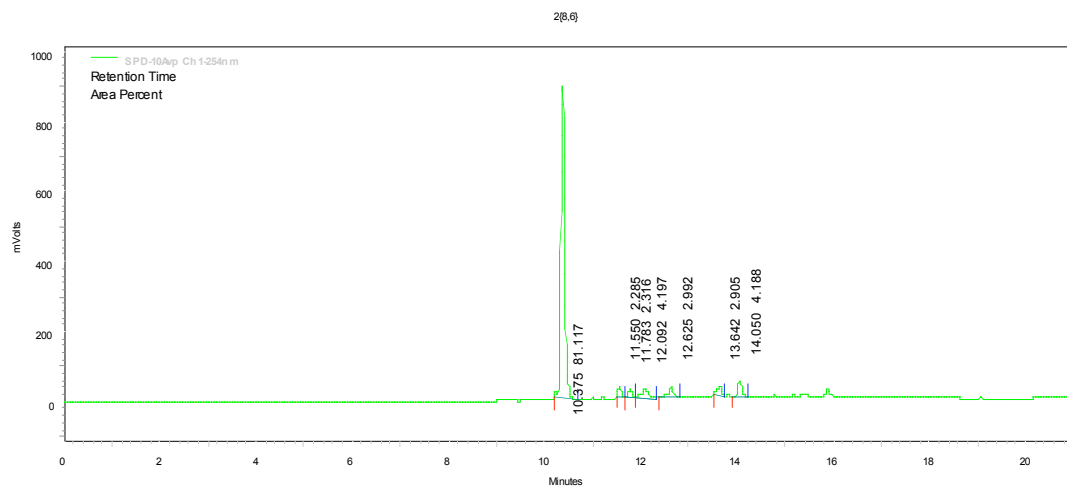

**1,4-disubstituted 1,2,3-triazole member 2{8,7}**. HPLC (CH<sub>3</sub>OH : H<sub>2</sub>O) R<sub>T</sub> 14.56 (98%), gradient elution 55% to 95% over 21 min.

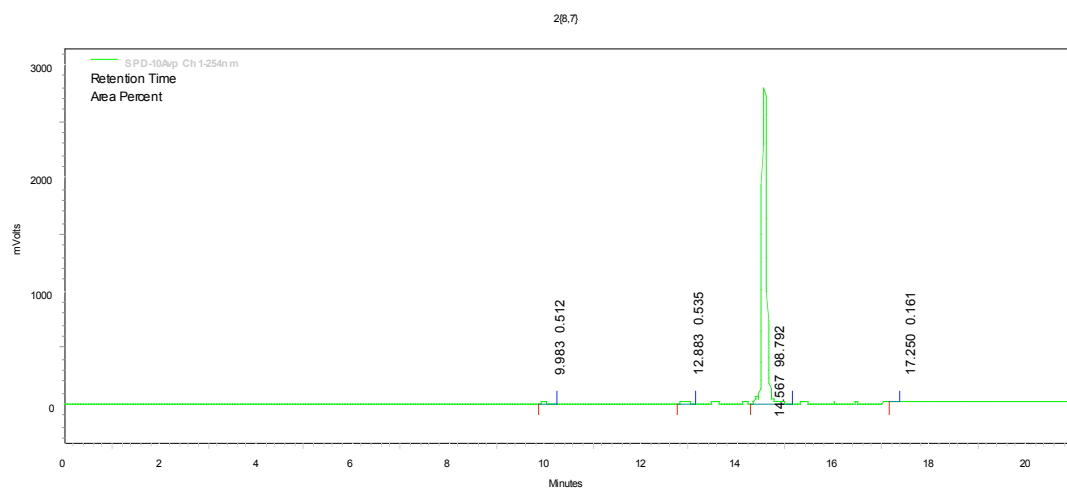

**1,4-disubstituted 1,2,3-triazole member 2{8,8}. HPLC (CH<sub>3</sub>OH : H<sub>2</sub>O) R<sub>T</sub> 19.70 (98%).**

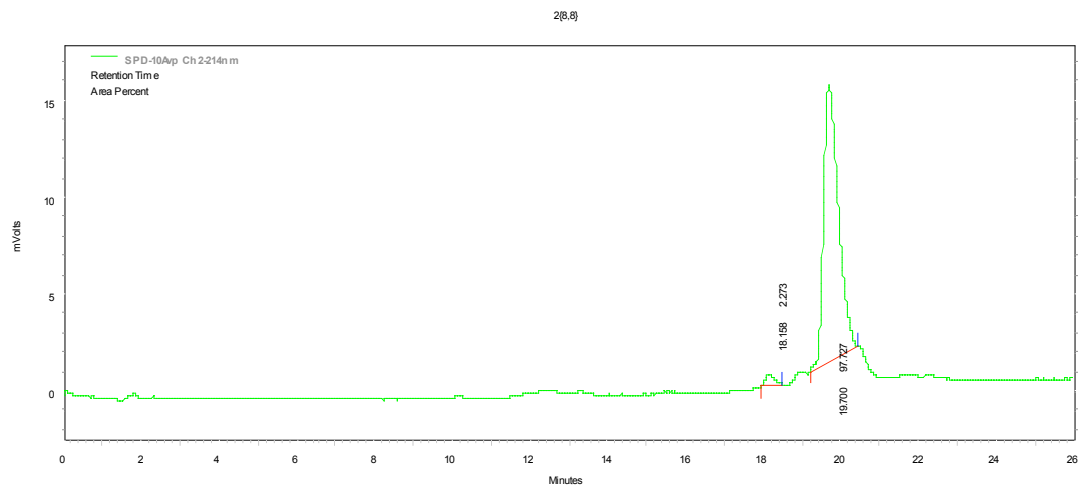

**1,4-disubstituted 1,2,3-triazole member 2{8,9}. HPLC (CH<sub>3</sub>OH : H<sub>2</sub>O) R<sub>T</sub> 18.19 (90%).**

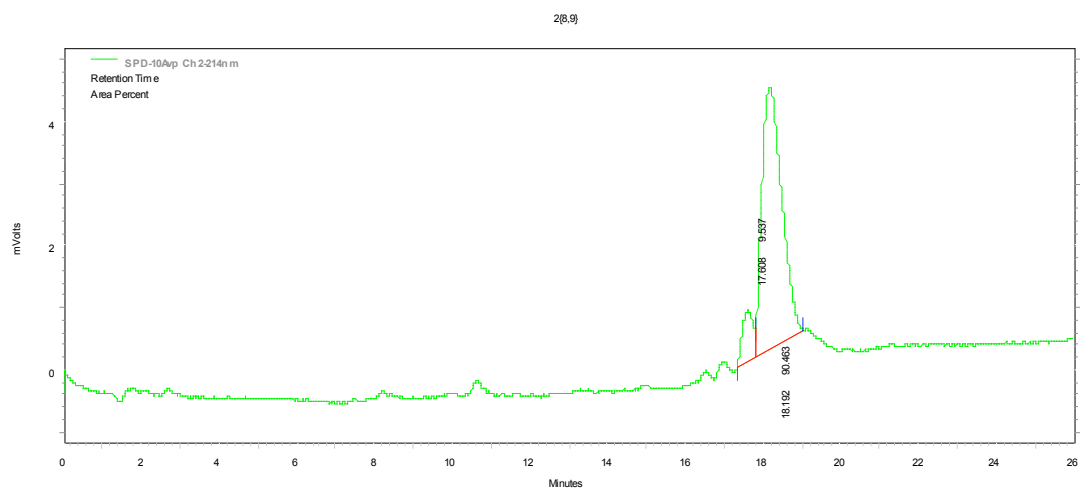

**1,4-disubstituted 1,2,3-triazole member 2{9,1}**. HPLC (1% AcOH in CH<sub>3</sub>OH : H<sub>2</sub>O) R<sub>T</sub> 2.50 (100%), gradient elution 30% to 90% over 26 min.

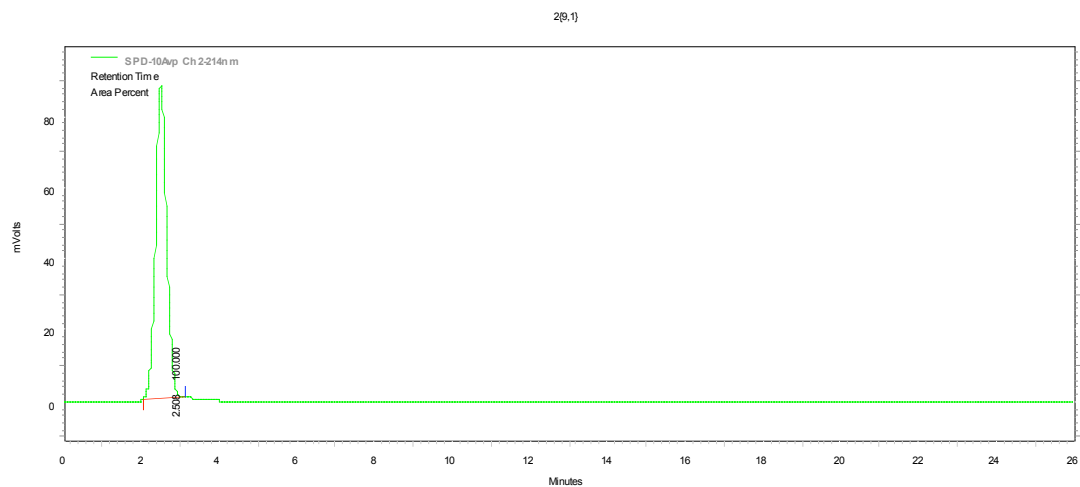

**1,4-disubstituted 1,2,3-triazole member 2{9,2}**. HPLC (1% AcOH in CH<sub>3</sub>OH : H<sub>2</sub>O) R<sub>T</sub> 2.51 (89%), gradient elution 30% to 90% over 21 min.

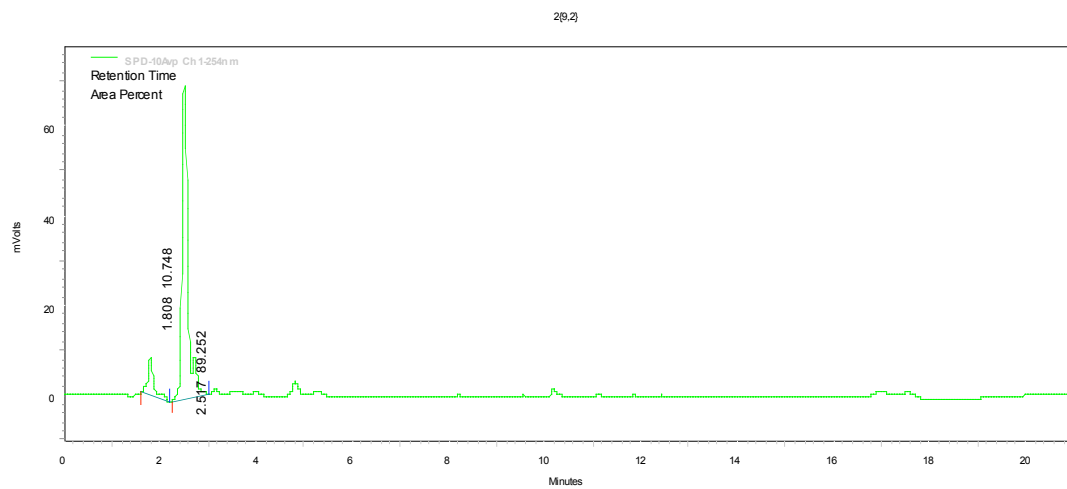

**1,4-disubstituted 1,2,3-triazole member 2{9,3}**. HPLC (1% AcOH in CH<sub>3</sub>OH : H<sub>2</sub>O) R<sub>T</sub> 2.51 (100%), gradient elution 30% to 90% over 26 min.

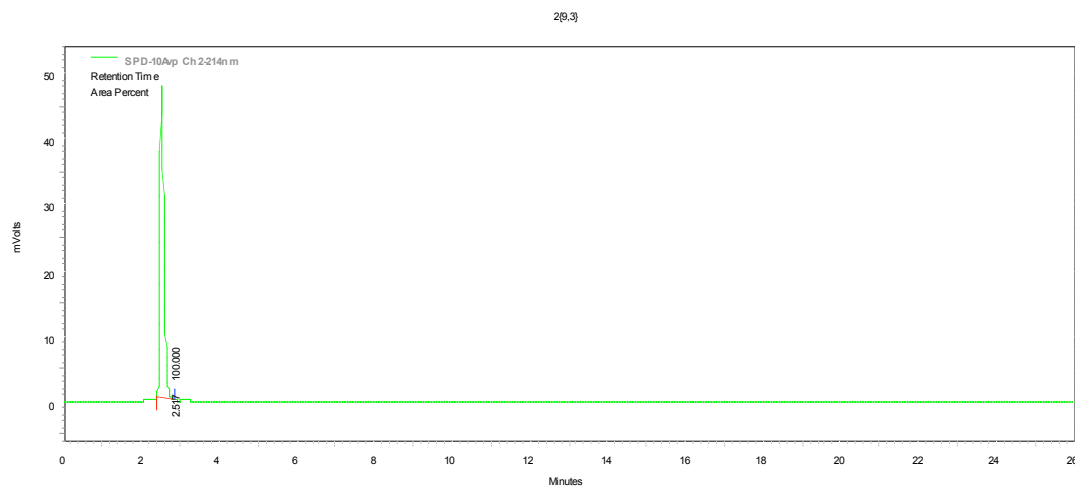

**1,4-disubstituted 1,2,3-triazole member 2{9,4}**. HPLC (CH<sub>3</sub>OH : H<sub>2</sub>O) R<sub>T</sub> 15.12 (82%).

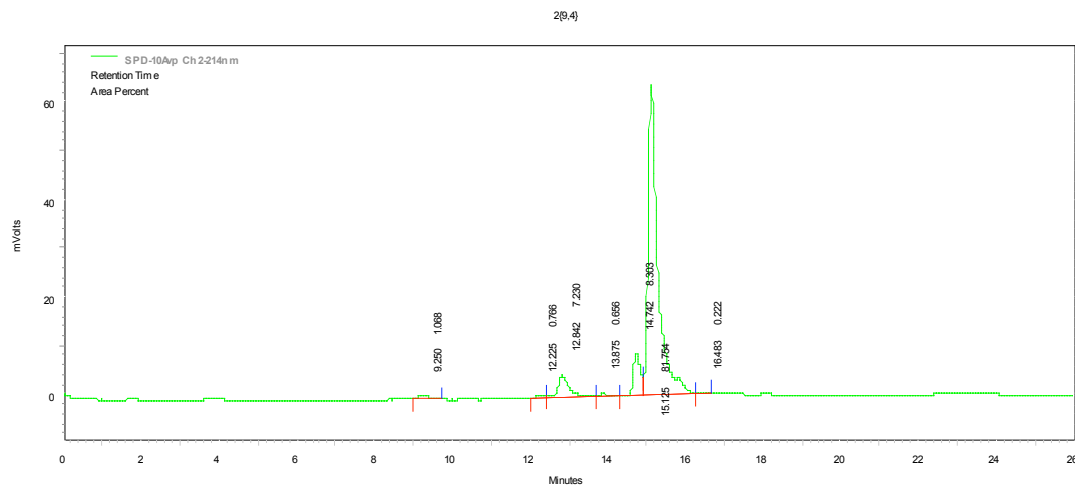

**1,4-disubstituted 1,2,3-triazole member 2{9,5}**. HPLC (1% AcOH in CH<sub>3</sub>OH : H<sub>2</sub>O) R<sub>T</sub> 2.51 (84%), gradient elution 30% to 90% over 21 min.

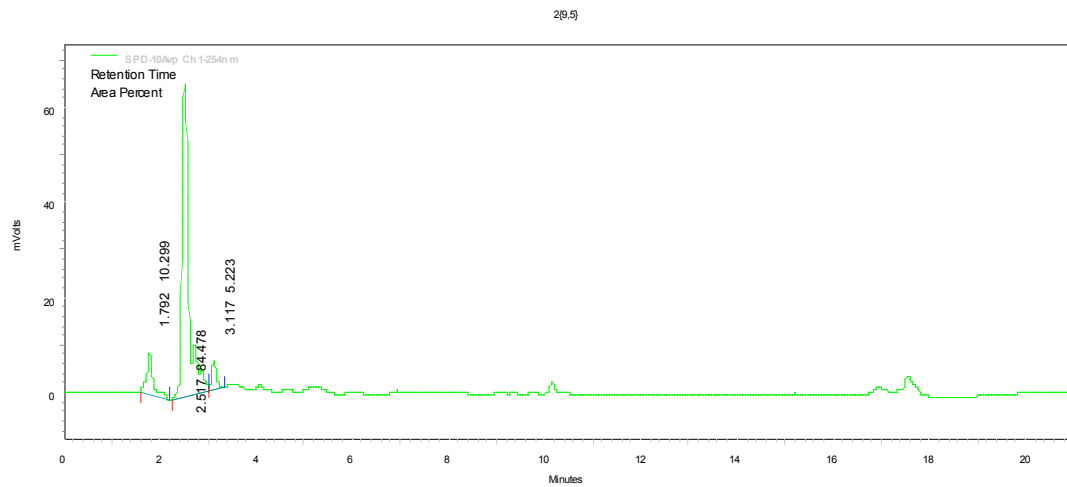

**1,4-disubstituted 1,2,3-triazole member 2{9,6}**. HPLC (CH<sub>3</sub>OH : H<sub>2</sub>O) R<sub>T</sub> 8.85 (90%), gradient elution 55% to 95% over 21 min.

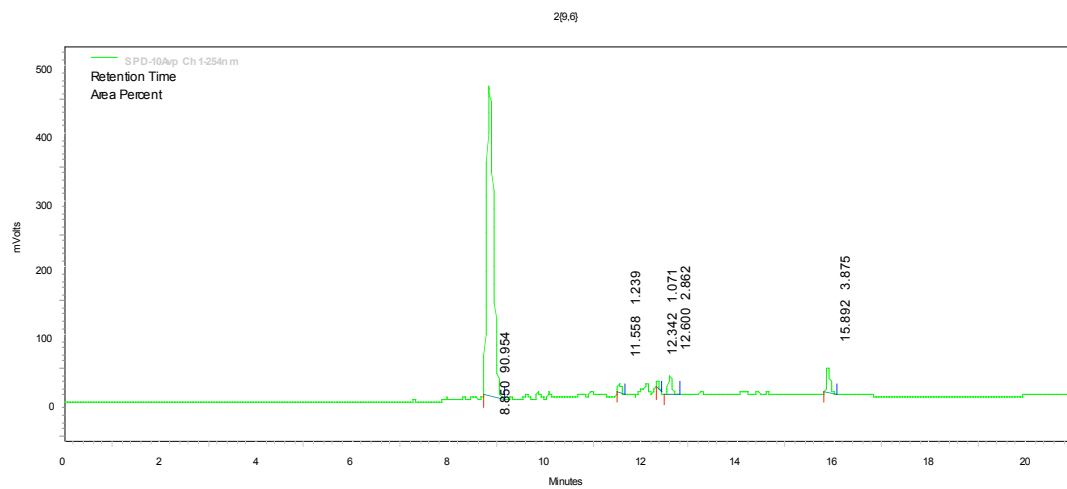



**1,4-disubstituted 1,2,3-triazole member 2{9,7}**. HPLC (CH<sub>3</sub>OH : H<sub>2</sub>O) R<sub>T</sub> 12.84 (98%), gradient elution 55% to 95% over 21 min.

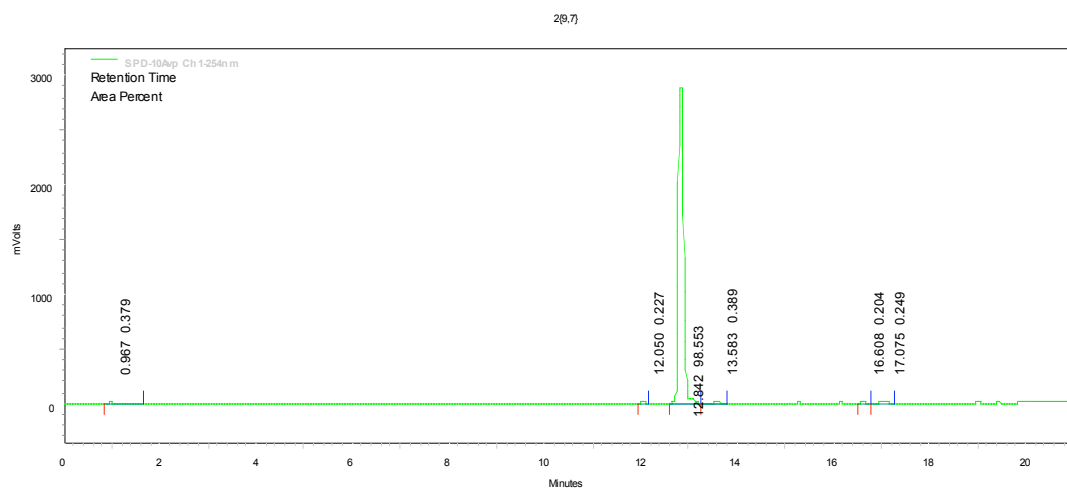

**1,4-disubstituted 1,2,3-triazole member 2{9,8}**. HPLC (CH<sub>3</sub>OH : H<sub>2</sub>O) R<sub>T</sub> 18.94 (81%).

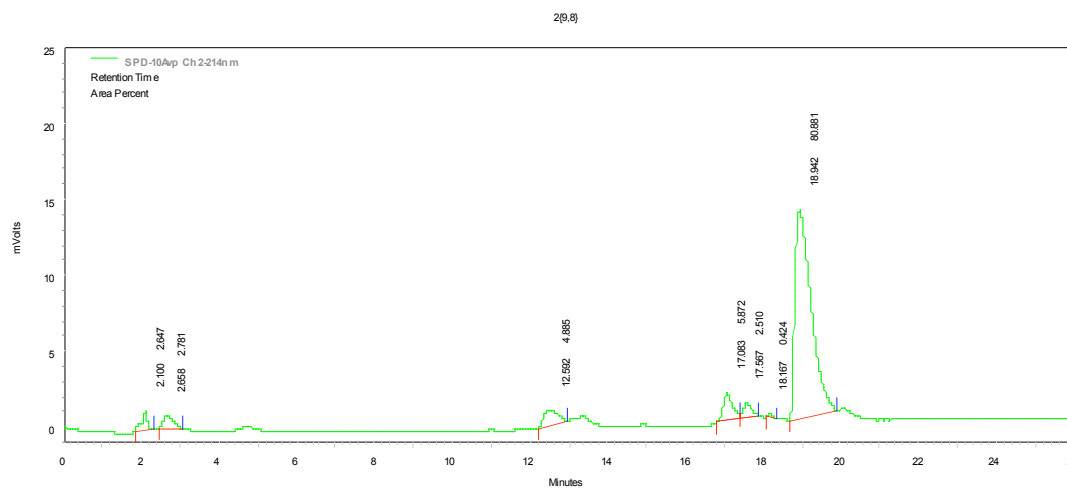

**1,4-disubstituted 1,2,3-triazole member 2{9,9}**. HPLC (CH<sub>3</sub>OH : H<sub>2</sub>O) R<sub>T</sub> 14.20 (100%), gradient elution 55% to 95% over 21 min.

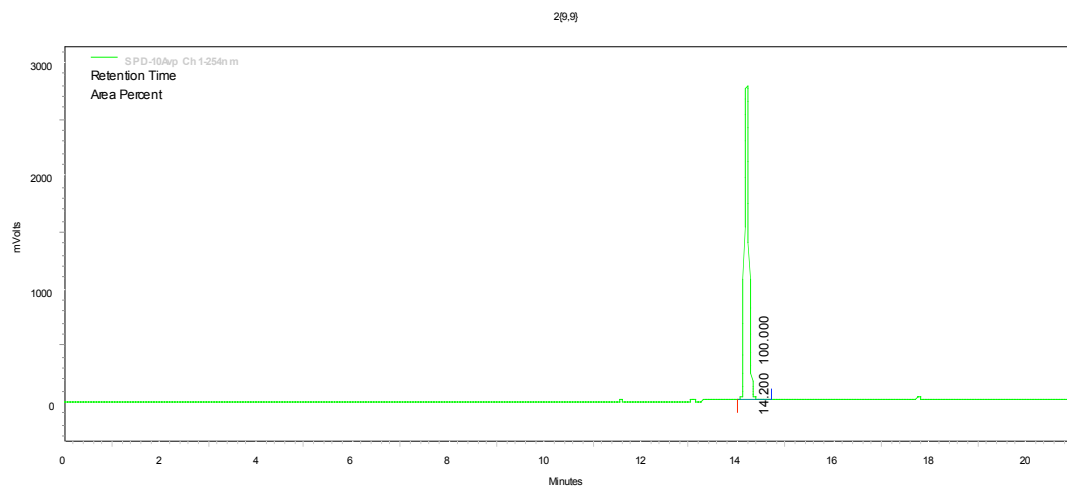

**1,4-disubstituted 1,2,3-triazole member 2{10,1}**. HPLC (1% AcOH in CH<sub>3</sub>OH : H<sub>2</sub>O) R<sub>T</sub> 2.54 (83%), gradient elution 30% to 90% over 21 min.

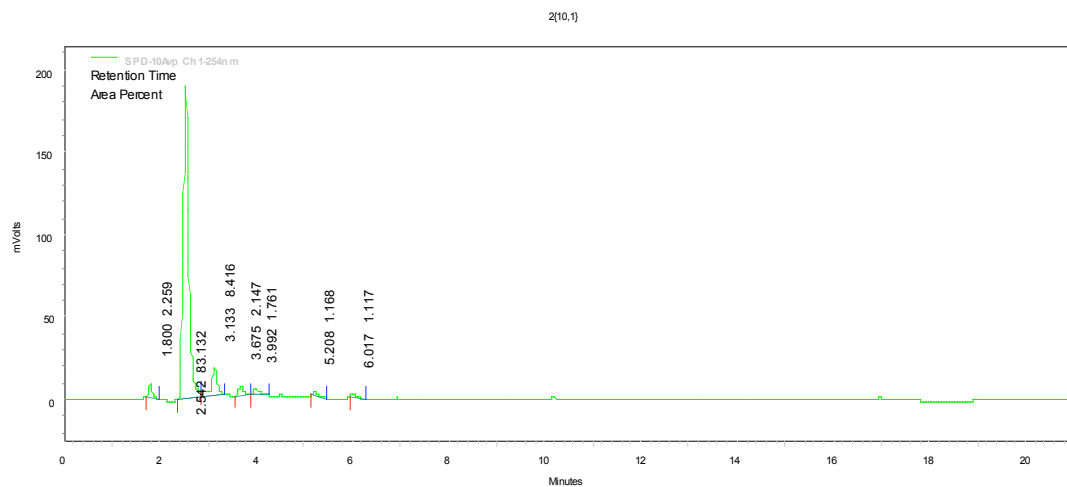

**1,4-disubstituted 1,2,3-triazole member 2{10,2}**. HPLC (1% AcOH in CH<sub>3</sub>OH : H<sub>2</sub>O) R<sub>T</sub> 2.65 (100%), gradient elution 30% to 90% over 21 min.

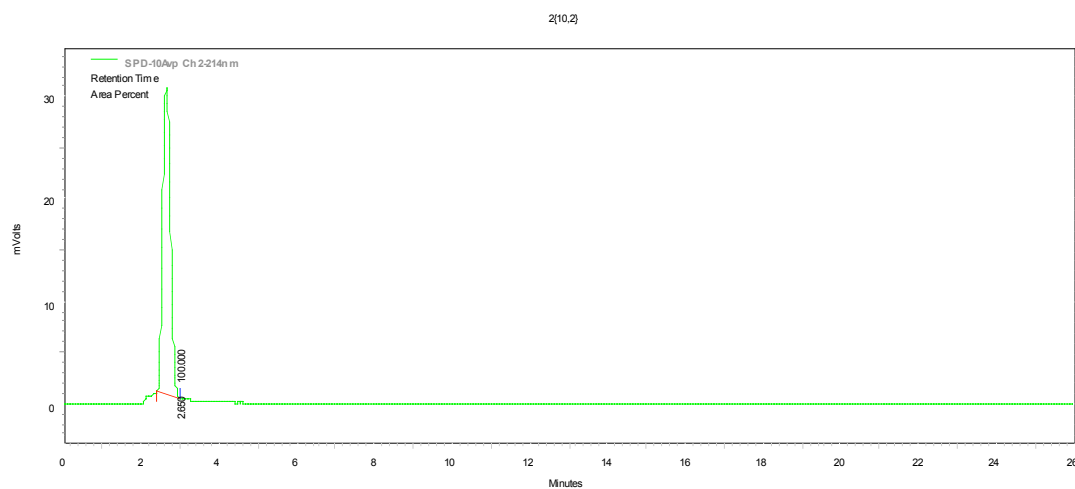

**1,4-disubstituted 1,2,3-triazole member 2{10,3}**. HPLC (CH<sub>3</sub>OH : H<sub>2</sub>O) R<sub>T</sub> 14.43 (84%), gradient elution 55% to 95% over 21 min.

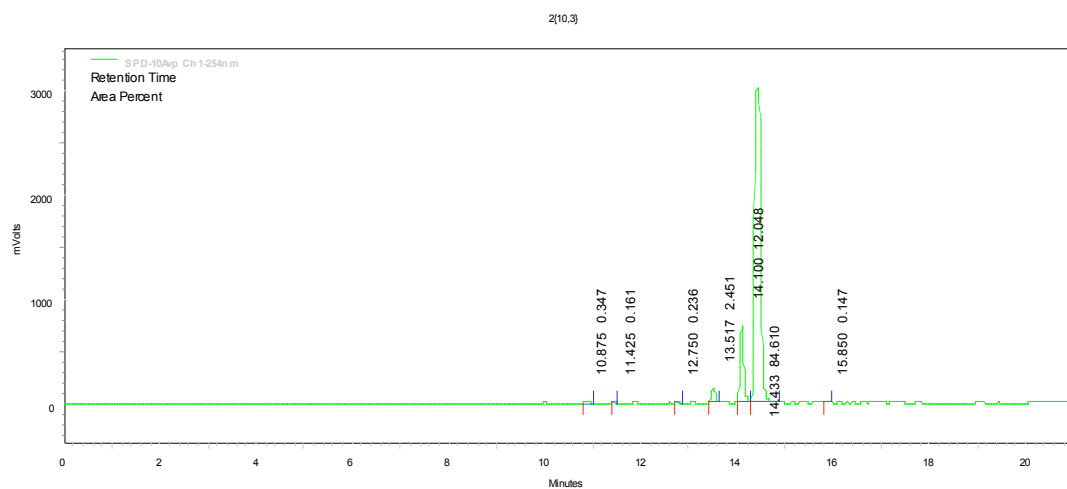

**1,4-disubstituted 1,2,3-triazole member 2{10,4}**. HPLC (CH<sub>3</sub>OH : H<sub>2</sub>O) R<sub>T</sub> 10.11 (84%), gradient elution 55% to 95% over 21 min.

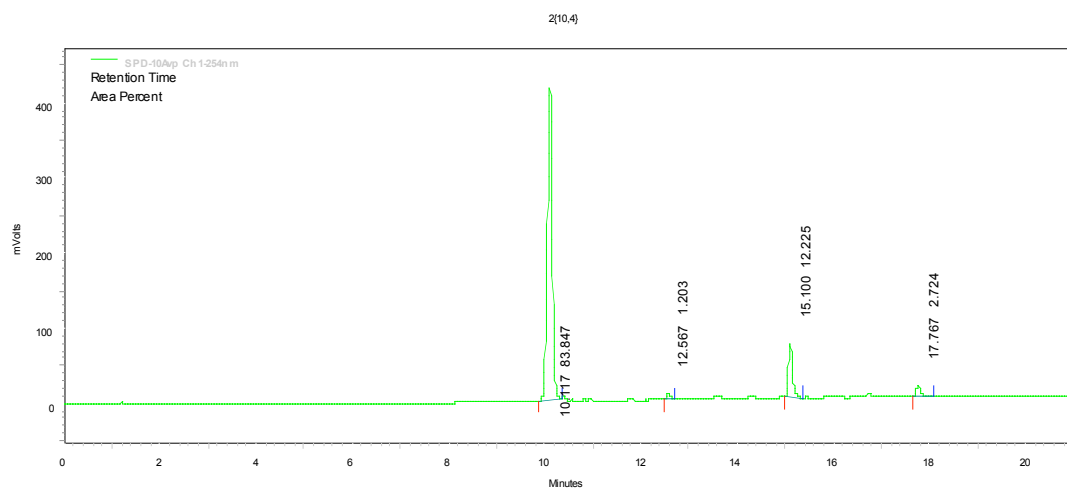

**1,4-disubstituted 1,2,3-triazole member 2{10,5}**. HPLC (1% AcOH in CH<sub>3</sub>OH : H<sub>2</sub>O) R<sub>T</sub> 2.52 (100%), gradient elution 30% to 90% over 26 min.

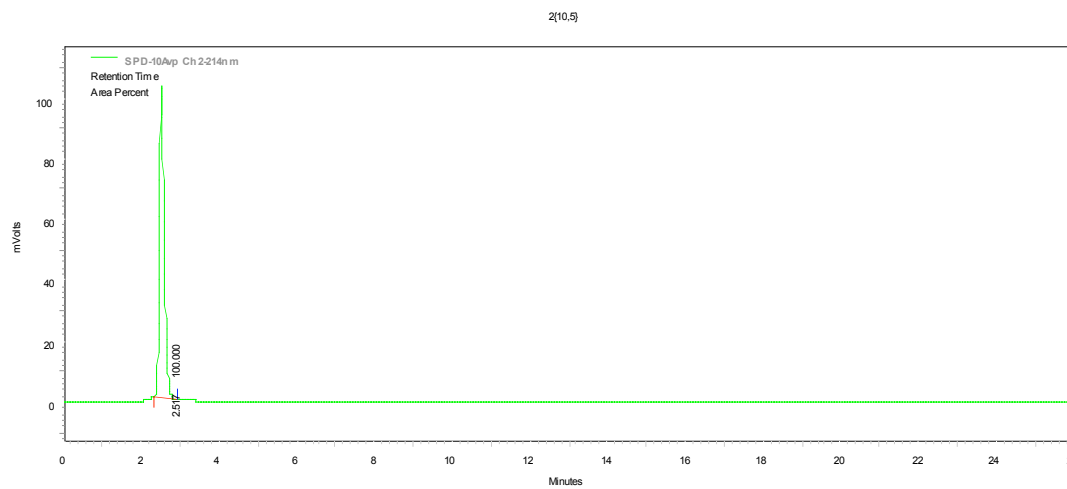

**1,4-disubstituted 1,2,3-triazole member 2{10,6}**. HPLC (CH<sub>3</sub>OH : H<sub>2</sub>O) R<sub>T</sub> 11.85 (82%), gradient elution 55% to 95% over 21 min.

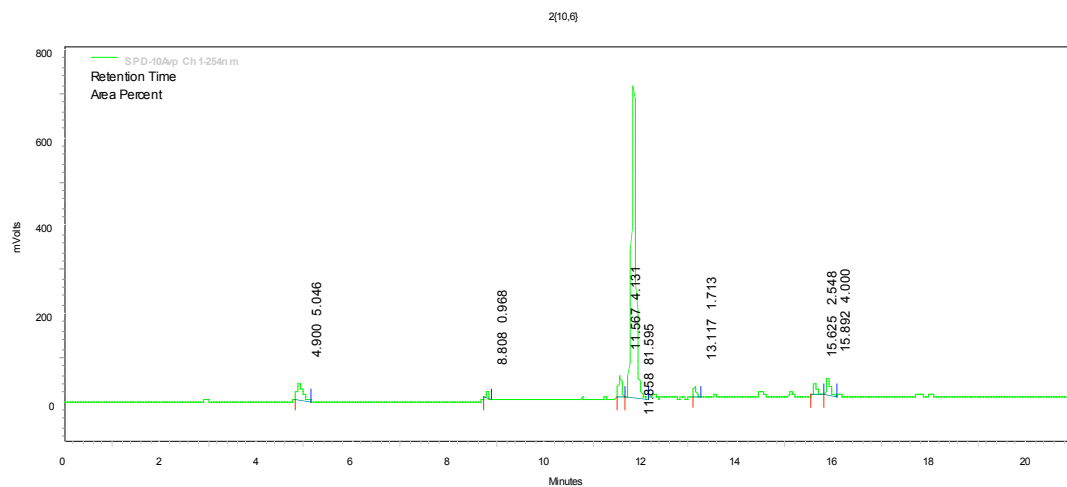

**1,4-disubstituted 1,2,3-triazole member 2{10,7}**. HPLC (CH<sub>3</sub>OH : H<sub>2</sub>O) R<sub>T</sub> 16.73 (94%), gradient elution 55% to 95% over 21 min.

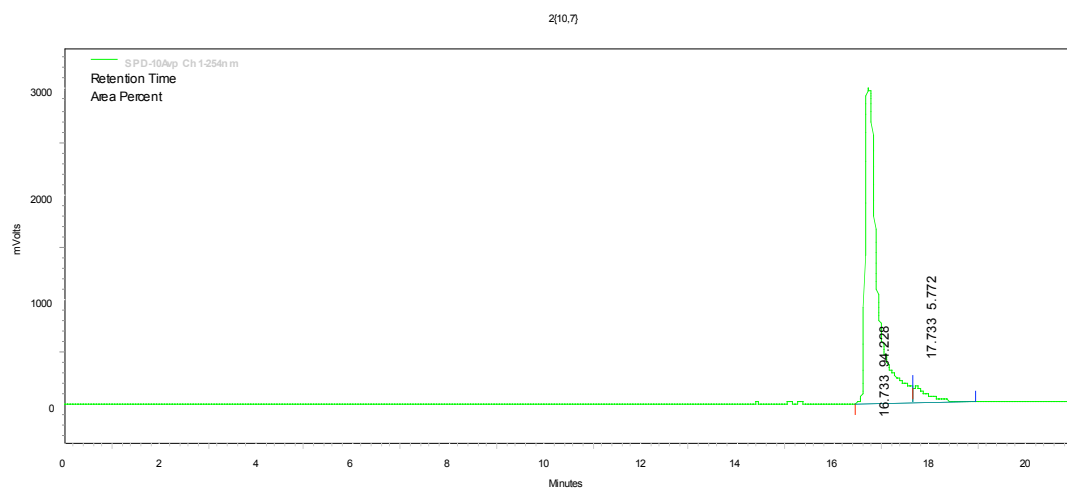

**1,4-disubstituted 1,2,3-triazole member 2{10,8}. HPLC (CH<sub>3</sub>OH : H<sub>2</sub>O) R<sub>T</sub> 14.47 (82%).**

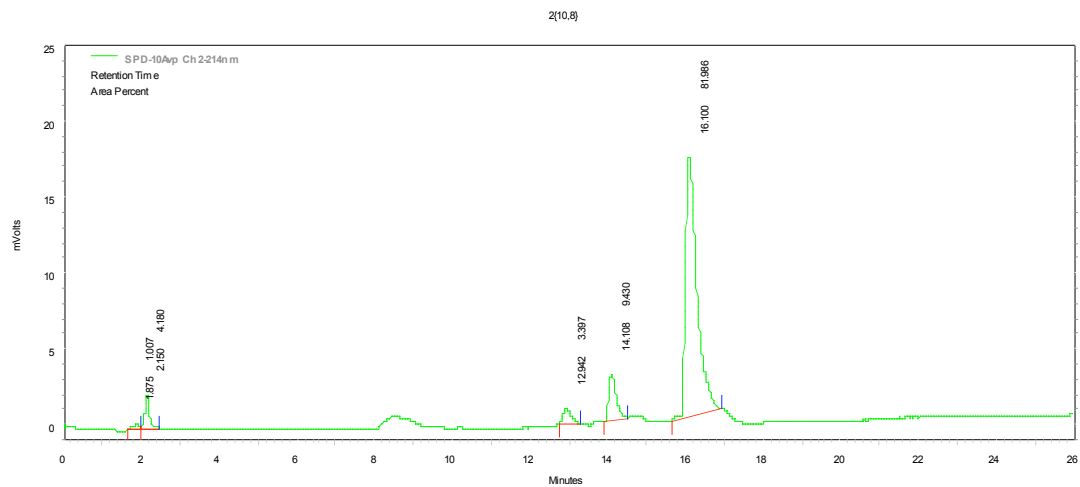

**1,4-disubstituted 1,2,3-triazole member 2{10,9}. HPLC (1% AcOH in CH<sub>3</sub>OH : H<sub>2</sub>O) R<sub>T</sub> 3.40 (100%), gradient elution 30% to 90% over 20 min.**

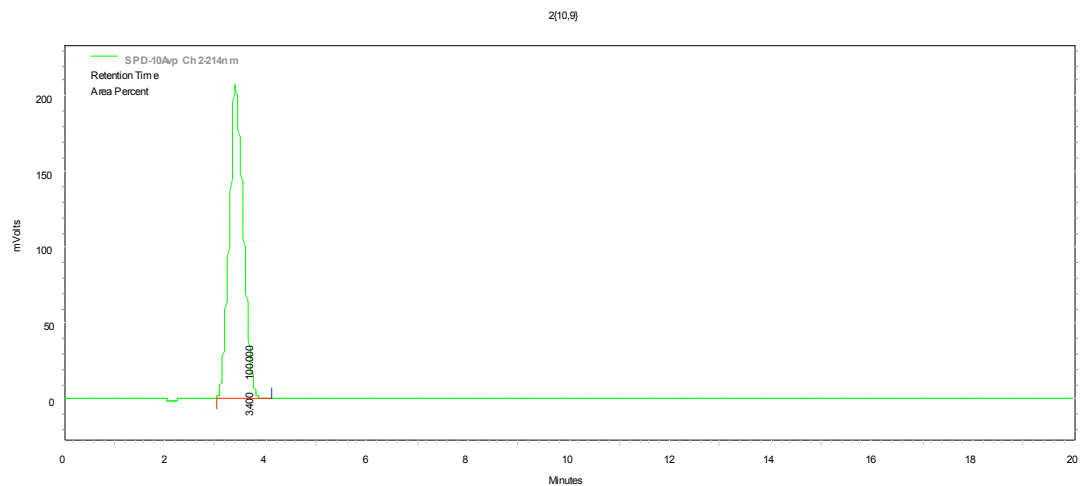

**1,4-disubstituted 1,2,3-triazole member 2{11,1}. HPLC (CH<sub>3</sub>OH : H<sub>2</sub>O) R<sub>T</sub> 16.80 (86%).**

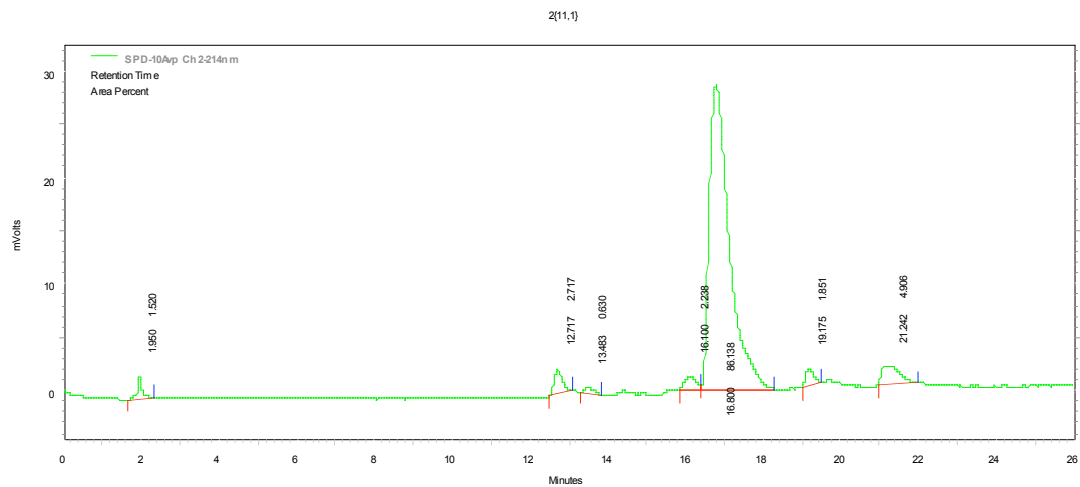

**1,4-disubstituted 1,2,3-triazole member 2{11,2}. HPLC (CH<sub>3</sub>OH : H<sub>2</sub>O) R<sub>T</sub> 14.34 (96%).**

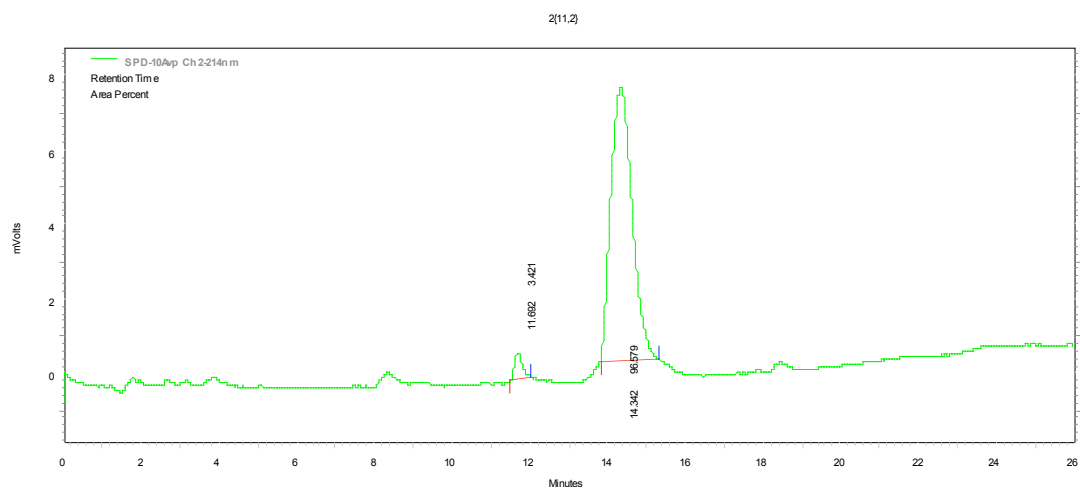

**1,4-disubstituted 1,2,3-triazole member 2{11,3}. HPLC (CH<sub>3</sub>OH : H<sub>2</sub>O) R<sub>T</sub> 14.66 (86%).**

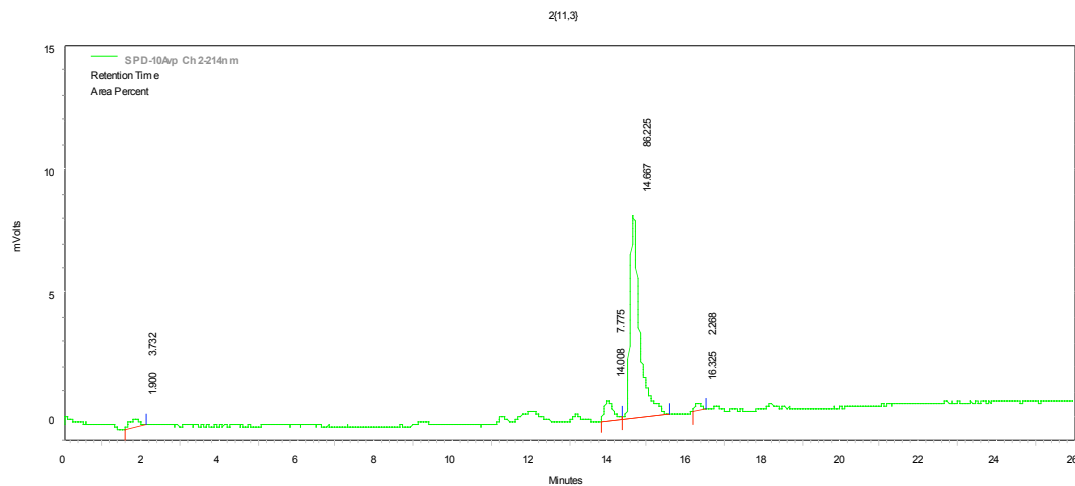

**1,4-disubstituted 1,2,3-triazole member 2{11,4}. HPLC (CH<sub>3</sub>OH : H<sub>2</sub>O) R<sub>T</sub> 16.15 (86%).**

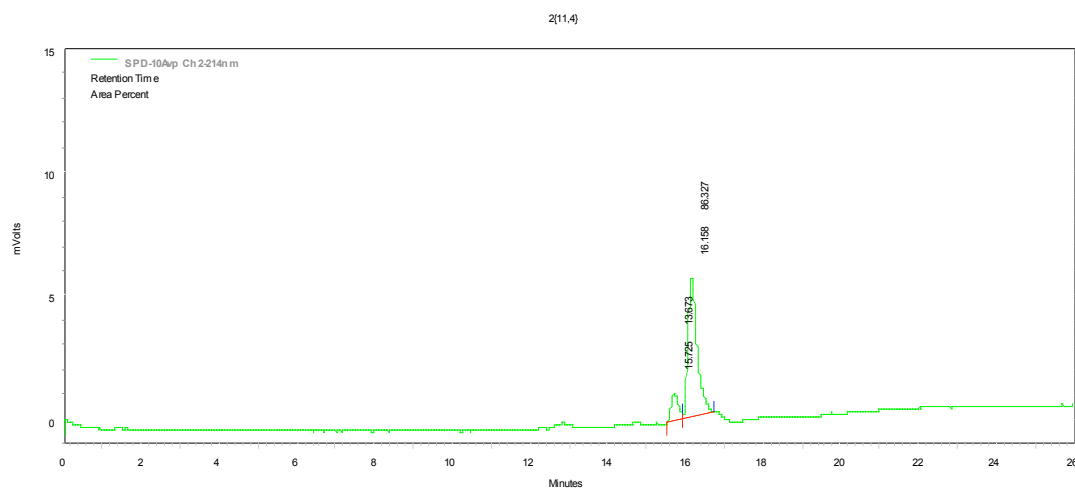



**1,4-disubstituted 1,2,3-triazole member 2{11,5}. HPLC (CH<sub>3</sub>OH : H<sub>2</sub>O) R<sub>T</sub> 16.67 (98%).**

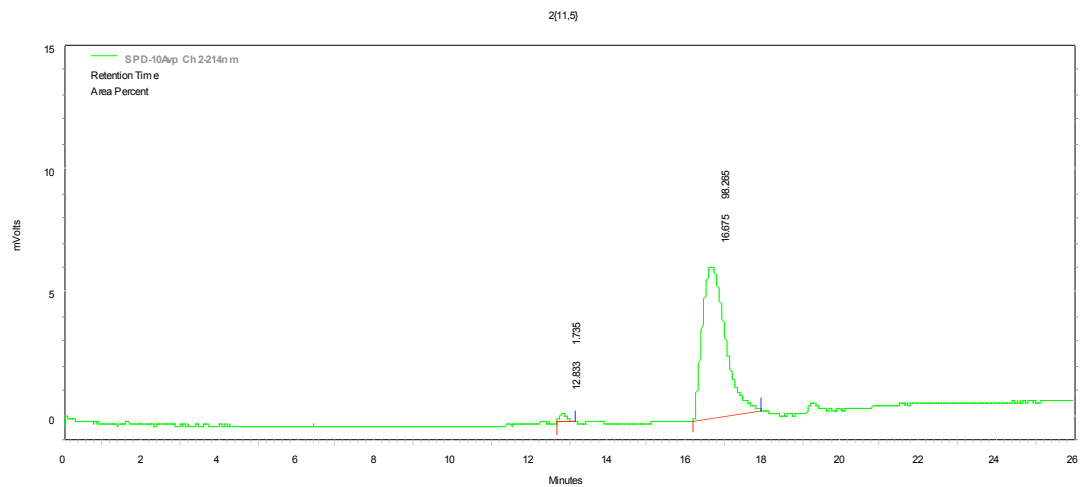

**1,4-disubstituted 1,2,3-triazole member 2{11,6}. HPLC (CH<sub>3</sub>OH : H<sub>2</sub>O) R<sub>T</sub> 15.32 (81%).**

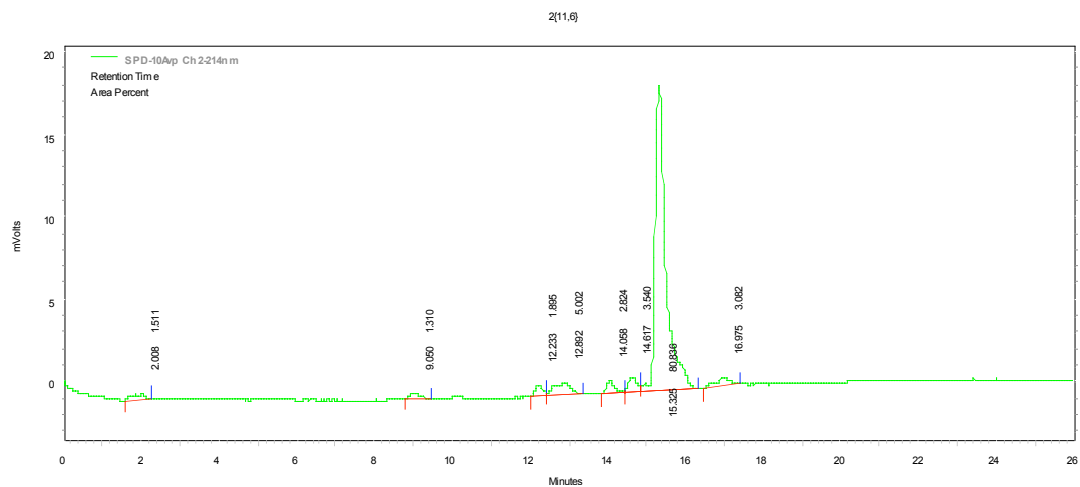

**1,4-disubstituted 1,2,3-triazole member 2{11,7}. HPLC (CH<sub>3</sub>OH : H<sub>2</sub>O) R<sub>T</sub> 19.41 (100%).**

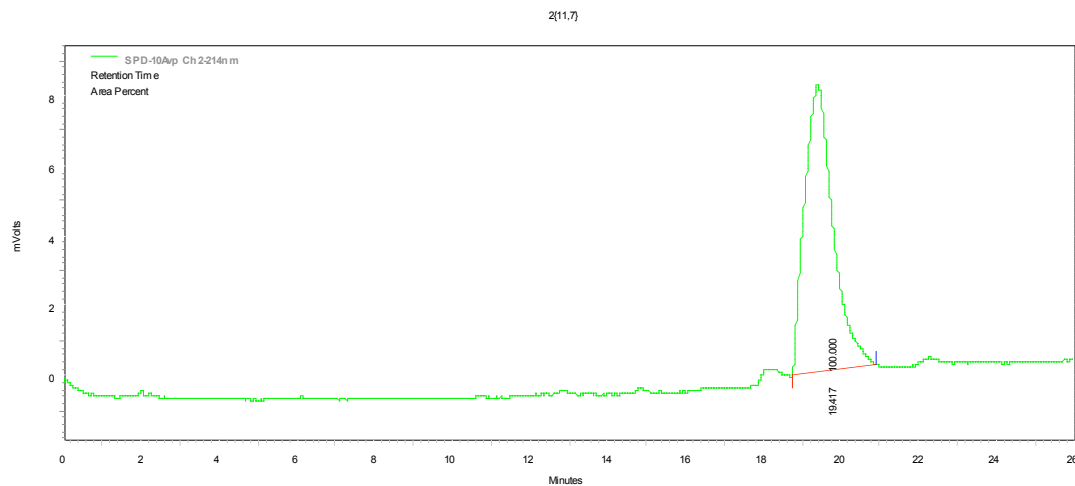

**1,4-disubstituted 1,2,3-triazole member 2{11,8}. HPLC (CH<sub>3</sub>OH : H<sub>2</sub>O) R<sub>T</sub> 19.88 (95%).**

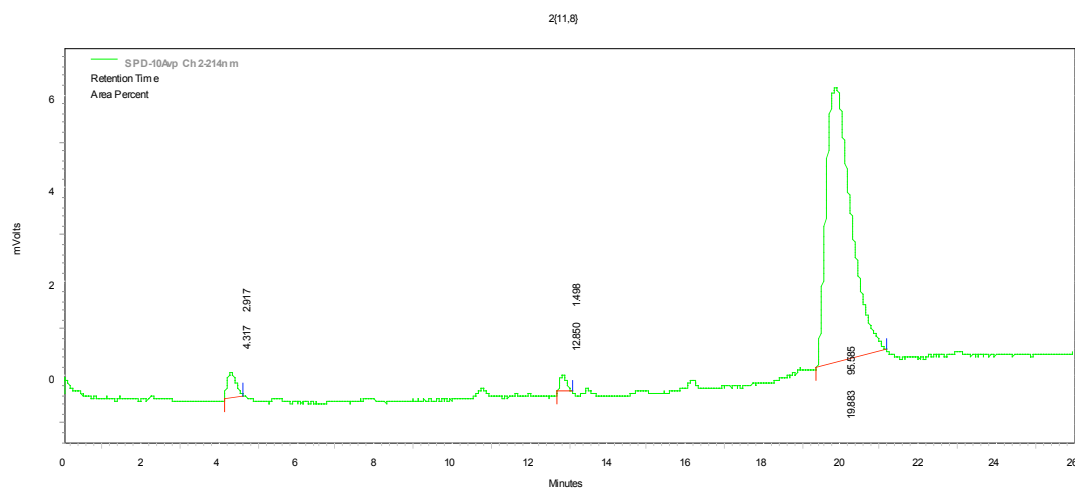

**1,4-disubstituted 1,2,3-triazole member 2{11,9}. HPLC (CH<sub>3</sub>OH : H<sub>2</sub>O) R<sub>T</sub> 17.04 (95%).**

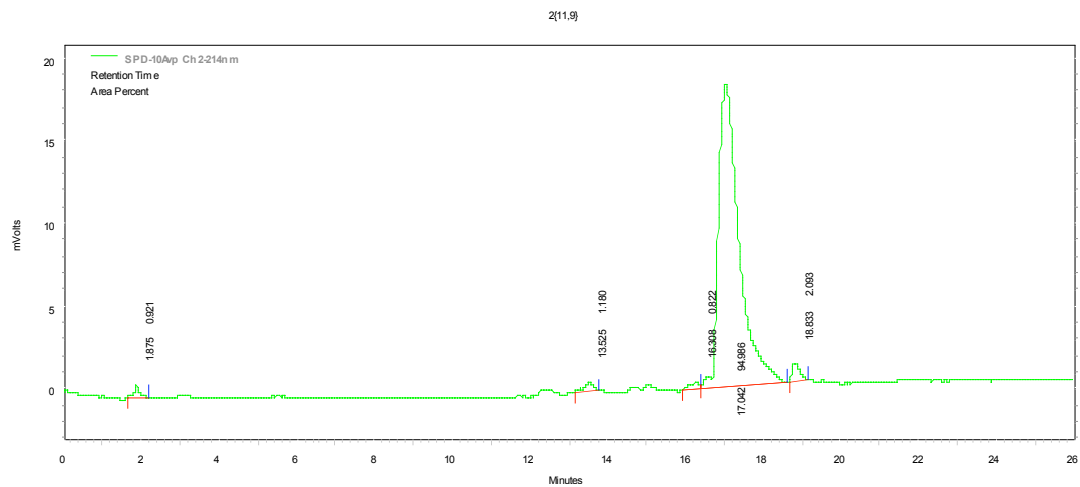

**1,4-disubstituted 1,2,3-triazole member 2{12,1}. HPLC (CH<sub>3</sub>OH : H<sub>2</sub>O) R<sub>T</sub> 20.38 (81%),  
gradient elution 55% to 95% over 35 min.**

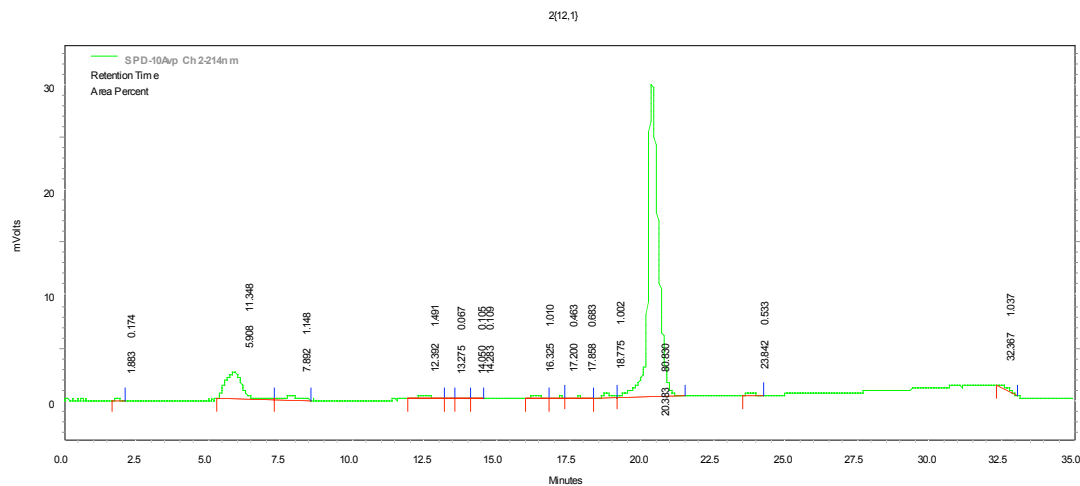

**1,4-disubstituted 1,2,3-triazole member 2{12,2}**. HPLC (CH<sub>3</sub>OH : H<sub>2</sub>O) R<sub>T</sub> 20.29 (97%), gradient elution 55% to 95% over 35 min.

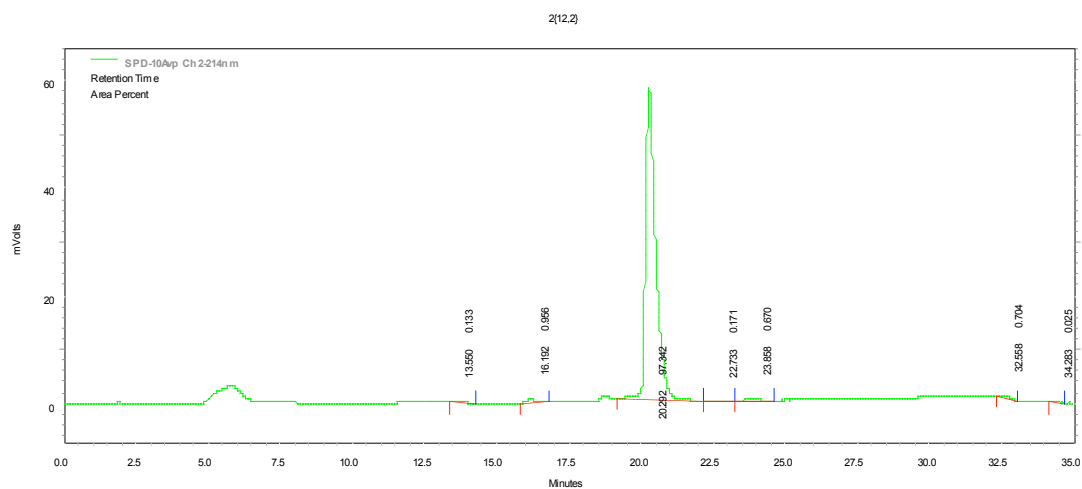

**1,4-disubstituted 1,2,3-triazole member 2{12,3}**. HPLC (1% AcOH in CH<sub>3</sub>OH : H<sub>2</sub>O) R<sub>T</sub> 2.90 (93%), gradient elution 30% to 90% over 13 min.

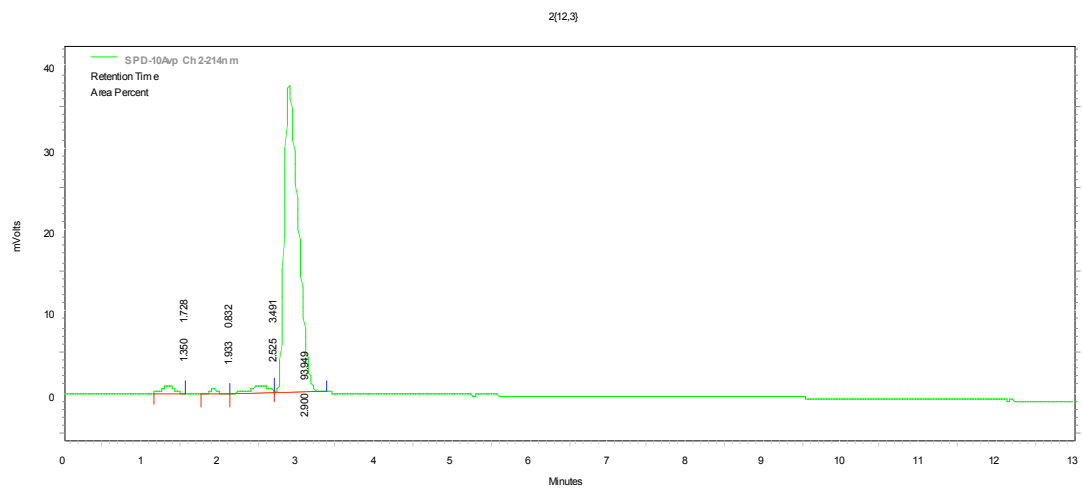

**1,4-disubstituted 1,2,3-triazole member 2{12,4}**. HPLC (CH<sub>3</sub>OH : H<sub>2</sub>O) R<sub>T</sub> 12.17 (81%), gradient elution 55% to 95% over 21 min.

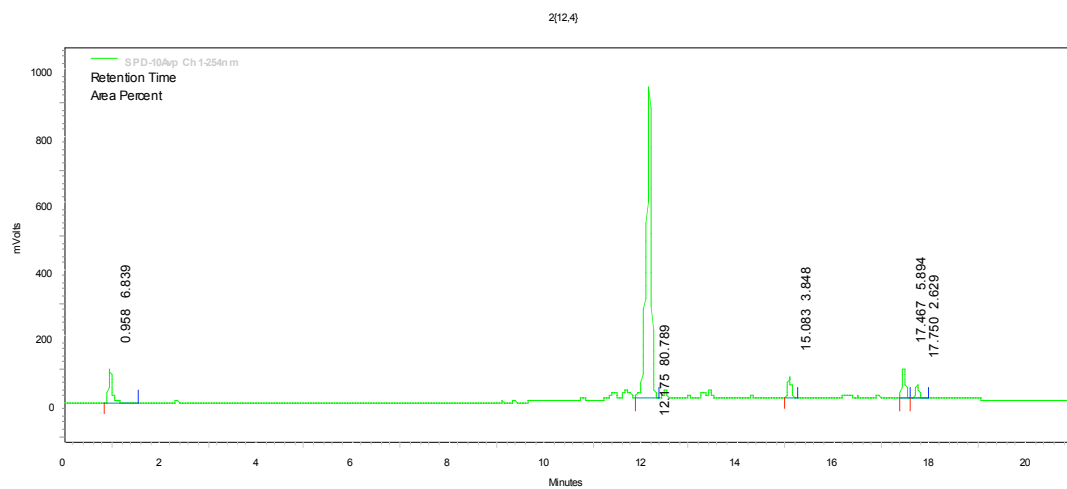

**1,4-disubstituted 1,2,3-triazole member 2{12,5}**. HPLC (CH<sub>3</sub>OH : H<sub>2</sub>O) R<sub>T</sub> 14.48 (98%), gradient elution 55% to 95% over 21 min.

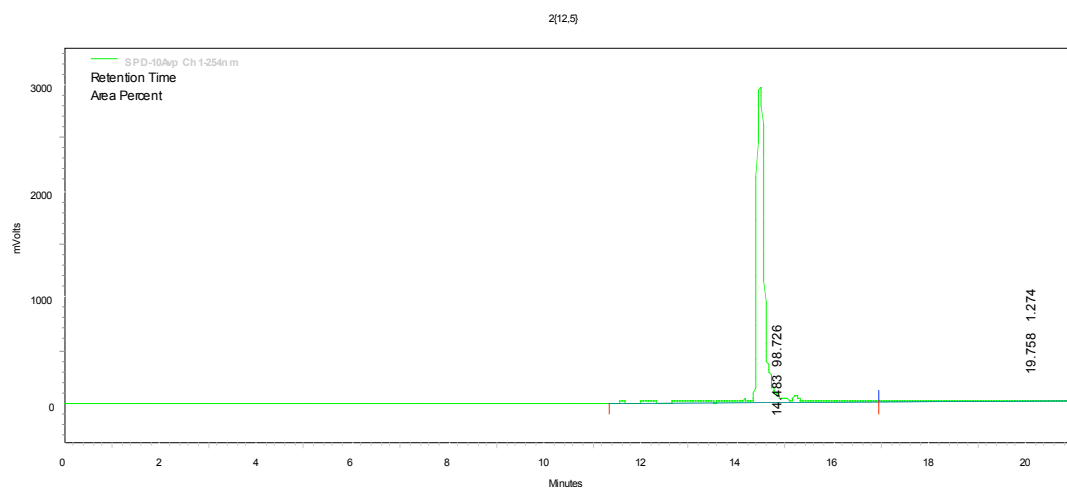

**1,4-disubstituted 1,2,3-triazole member 2{12,6}**. HPLC (CH<sub>3</sub>OH : H<sub>2</sub>O) R<sub>T</sub> 11.41 (84%), gradient elution 55% to 95% over 21 min.

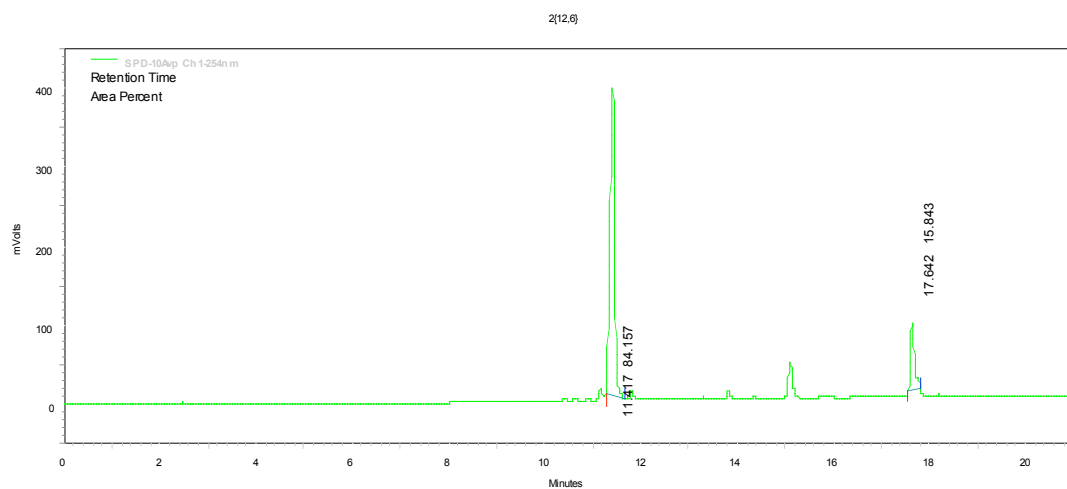

**1,4-disubstituted 1,2,3-triazole member 2{12,7}**. HPLC (CH<sub>3</sub>OH : H<sub>2</sub>O) R<sub>T</sub> 15.25 (96%), gradient elution 55% to 95% over 21 min.

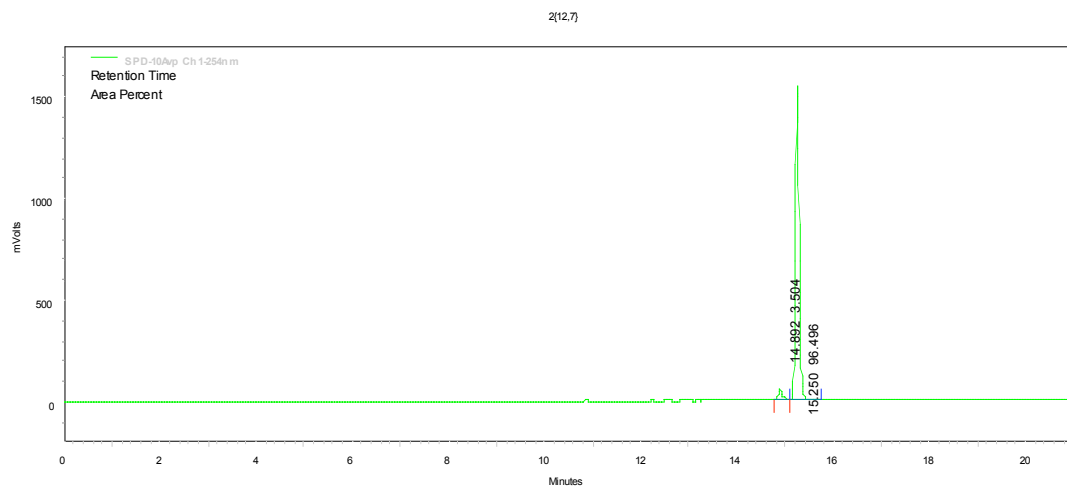

**1,4-disubstituted 1,2,3-triazole member 2{12,8}**. HPLC (CH<sub>3</sub>OH : H<sub>2</sub>O) R<sub>T</sub> 13.92 (84%), gradient elution 55% to 95% over 21 min.

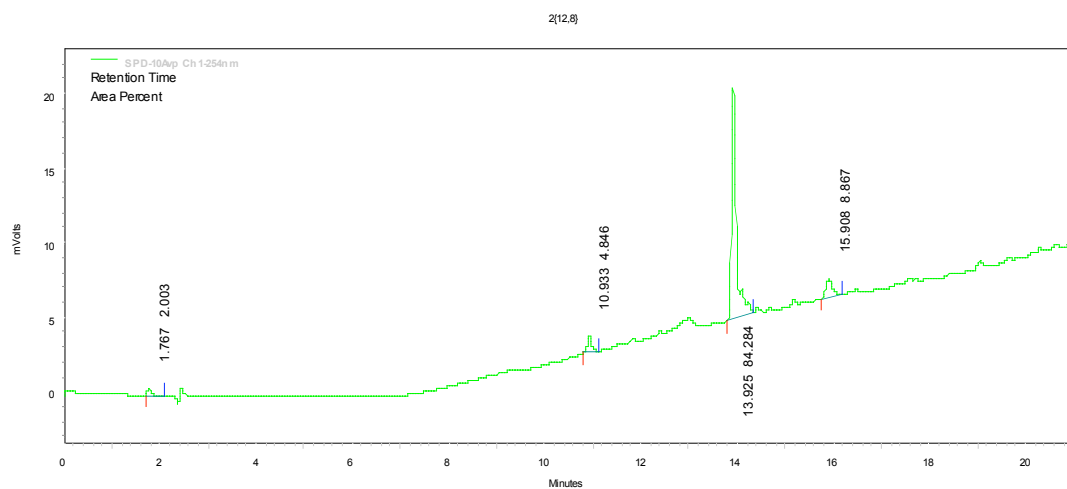

**1,4-disubstituted 1,2,3-triazole member 2{12,9}**. HPLC (CH<sub>3</sub>OH : H<sub>2</sub>O) R<sub>T</sub> 10.99 (82%), gradient elution 55% to 95% over 21 min.

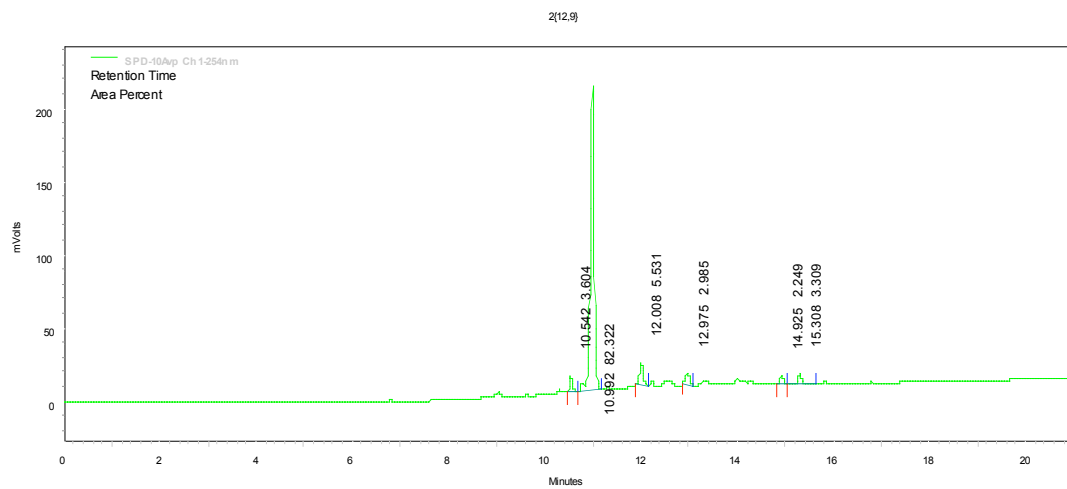

**Table 2.** Mass of molecular ion peak (MW+H) of the 1,4-disubstituted 1,2,3-triazole library members

| Compd  | MW     | MW+H   | Compd  | MW     | MW+H   | Compd  | MW     | MW+H   | Compd   | MW     | MW+H   |
|--------|--------|--------|--------|--------|--------|--------|--------|--------|---------|--------|--------|
| 2{1,1} | 410.59 | 411.35 | 2{4,1} | 417.55 | 418.35 | 2{7,1} | 310.48 | 311.25 | 2{10,1} | 412.57 | 413.30 |
| 2{1,2} | 430.58 | 431.25 | 2{4,2} | 437.53 | 438.95 | 2{7,2} | 330.47 | 331.20 | 2{10,2} | 432.56 | 432.95 |
| 2{1,3} | 416.56 | 416.70 | 2{4,3} | 432.51 | 423.90 | 2{7,3} | 316.44 | 316.85 | 2{10,3} | 418.53 | 419.25 |
| 2{1,4} | 368.47 | 369.30 | 2{4,4} | 375.42 | 376.25 | 2{7,4} | 268.36 | 269.20 | 2{10,4} | 370.45 | 371.25 |
| 2{1,5} | 442.59 | 443.40 | 2{4,5} | 449.55 | 450.35 | 2{7,5} | 342.48 | 342.90 | 2{10,5} | 444.25 | 445.30 |
| 2{1,6} | 443.58 | 444.30 | 2{4,6} | 450.53 | 451.25 | 2{7,6} | 343.47 | 344.90 | 2{10,6} | 445.56 | 445.95 |
| 2{1,7} | 438.56 | 439.35 | 2{4,7} | 445.51 | 446.25 | 2{7,7} | 338.45 | 339.30 | 2{10,7} | 440.54 | 441.75 |
| 2{1,8} | 408.58 | 409.35 | 2{4,8} | 415.53 | 416.95 | 2{7,8} | 308.26 | 309.25 | 2{10,8} | 410.55 | 411.35 |
| 2{1,9} | 382.54 | 383.30 | 2{4,9} | 389.49 | 390.30 | 2{7,9} | 282.42 | 282.95 | 2{10,9} | 384.47 | 385.30 |
| 2{2,1} | 388.50 | 389.95 | 2{5,1} | 383.53 | 384.30 | 2{8,1} | 374.52 | 375.25 | 2{11,1} | 426.59 | 430.00 |
| 2{2,2} | 408.49 | 409.35 | 2{5,2} | 403.52 | 403.75 | 2{8,2} | 394.51 | 395.80 | 2{11,2} | 445.58 | 445.95 |
| 2{2,3} | 394.47 | 395.80 | 2{5,3} | 389.49 | 391.20 | 2{8,3} | 380.48 | 381.25 | 2{11,3} | 432.56 | 423.90 |
| 2{2,4} | 346.38 | 347.20 | 2{5,4} | 341.41 | 342.20 | 2{8,4} | 332.40 | 333.20 | 2{11,4} | 384.47 | 384.30 |
| 2{2,5} | 420.50 | 422.35 | 2{5,5} | 415.53 | 415.95 | 2{8,5} | 406.52 | 406.95 | 2{11,5} | 458.60 | 459.00 |
| 2{2,6} | 421.49 | 422.95 | 2{5,6} | 416.52 | 417.25 | 2{8,6} | 407.51 | 407.90 | 2{11,6} | 459.58 | 459.80 |
| 2{2,7} | 416.47 | 417.25 | 2{5,7} | 411.50 | 413.05 | 2{8,7} | 402.49 | 403.25 | 2{11,7} | 451.56 | 452.32 |
| 2{2,8} | 384.54 | 385.25 | 2{5,8} | 381.51 | 382.35 | 2{8,8} | 372.50 | 373.25 | 2{11,8} | 424.58 | 423.40 |
| 2{2,9} | 360.45 | 361.20 | 2{5,9} | 355.48 | 356.30 | 2{8,9} | 346.47 | 346.20 | 2{11,9} | 398.54 | 401.15 |
| 2{3,1} | 394.55 | 395.80 | 2{6,1} | 330.47 | 330.90 | 2{9,1} | 308.46 | 308.95 | 2{12,1} | 442.59 | 444.30 |
| 2{3,2} | 414.54 | 415.00 | 2{6,2} | 350.46 | 350.90 | 2{9,2} | 328.45 | 329.25 | 2{12,2} | 462.58 | 463.00 |
| 2{3,3} | 400.51 | 402.90 | 2{6,3} | 336.43 | 336.95 | 2{9,3} | 314.43 | 314.95 | 2{12,3} | 448.56 | 449.00 |
| 2{3,4} | 351.43 | 352.85 | 2{6,4} | 288.34 | 289.25 | 2{9,4} | 266.34 | 267.20 | 2{12,4} | 400.47 | 402.25 |
| 2{3,5} | 426.55 | 428.15 | 2{6,5} | 362.47 | 362.85 | 2{9,5} | 340.46 | 340.90 | 2{12,5} | 474.59 | 475.85 |
| 2{3,6} | 427.54 | 429.15 | 2{6,6} | 363.46 | 364.20 | 2{9,6} | 341.45 | 342.90 | 2{12,6} | 475.58 | 475.85 |
| 2{3,7} | 422.52 | 423.30 | 2{6,7} | 358.43 | 358.85 | 2{9,7} | 336.43 | 337.90 | 2{12,7} | 470.56 | 470.80 |
| 2{3,8} | 392.54 | 393.35 | 2{6,8} | 328.45 | 328.90 | 2{9,8} | 306.24 | 307.90 | 2{12,8} | 440.28 | 441.90 |
| 2{3,9} | 366.50 | 367.30 | 2{6,9} | 302.41 | 302.90 | 2{9,9} | 280.41 | 281.25 | 2{12,9} | 414.54 | 415.00 |
